# Supplementary material for: Differential Expression of Urinary Exosomal Small RNAs in Idiopathic Membranous Nephropathy
Source: Biomed Res Int. 2020 Dec 29;2020:3170927. doi: 10.1155/2020/3170927 (PMC7785370; doi:10.1155/2020/3170927)
Supplement: Supplementary Materials — Supplementary file 1 is the raw data used to support the findings of this study. [file 3170927.f1.txt]

Index	miR_name	miR_seq	up/down	fold_change(MN(mean)/CON(mean))	log2(fold_change)	pvalue(t_test)	CON(mean)	MN(mean)	CON/CON_1(norm)	CON/CON_2(norm)	CON/CON_3(norm)	CON/CON_4(norm)	CON/CON_5(norm)	MN/MN_1(norm)	MN/MN_2(norm)	MN/MN_3(norm)	MN/MN_4(norm)	MN/MN_5(norm)	MN/MN_6(norm)	CON/CON_1(raw)	CON/CON_2(raw)	CON/CON_3(raw)	CON/CON_4(raw)	CON/CON_5(raw)	MN/MN_1(raw)	MN/MN_2(raw)	MN/MN_3(raw)	MN/MN_4(raw)	MN/MN_5(raw)	MN/MN_6(raw)	Expression level
1	hsa-miR-1180-3p	TTTCCGGCTCGCGTGGGTGTGT	up	6.153813344	2.621480685	1.18864E-05	28.98749166	178.383613	18.31289337	30.77960898	48.50408264	47.34087331	0	219.1350773	167.0430249	183.5732765	165.2992211	208.1738318	127.0772462	5	12	23	7	0	179	435	784	455	1401	513	middle
2	hsa-miR-151b_R+2	TCGAGGAGCTCACAGTCTAG	up	4.685502157	2.228203674	1.33394E-05	22.41093525	105.0064855	16.48160403	30.77960898	41.12302658	23.67043665	0	100.3859013	119.2341591	121.991935	98.63459015	86.33047558	103.4618515	4.5	12	19.5	3.5	0	82	310.5	521	271.5	581	417.6666667	middle
3	hsa-miR-191-5p_R-1	CAACGGAATCCCAAAAGCAGCT	up	2.36467266	1.241640486	1.49216E-05	1837.991215	4346.247575	1750.712606	1715.9632	2193.228084	1724.560385	1805.491799	3522.076075	4855.383923	4567.556001	4700.673893	4504.786623	3927.008935	478	669	1040	255	399	2877	12644	19507	12939	30317	15853	high
4	hsa-miR-151a-3p	CTAGACTGAAGCTCCTTGAGG	up	3.296520727	1.720944152	2.28431E-05	375.690848	1238.472667	329.6320806	479.6489066	567.2868795	108.2077104	393.678663	1449.474478	1198.101696	952.7546711	1238.10933	1248.300044	1344.095785	90	187	269	16	87	1184	3120	4069	3408	8401	5426	high
5	hsa-miR-450a-2-3p_L-1	TTGGGGACATTTTGCATTCAT	up	inf	inf	4.66441E-05	0	15.64308566	0	0	0	0	0	13.4664014	13.82425034	18.73196699	15.98497962	19.46521911	12.38569651	0	0	0	0	0	11	36	80	44	131	50	middle
6	hsa-miR-10b-3p	ACAGATTCGATTCTAGGGGAAT	up	2.278200111	1.187894475	7.04857E-05	105.1358075	239.5204084	128.1902536	94.90379434	128.6412626	74.39280091	99.55092628	286.4670843	276.4850067	220.1006121	222.6998297	185.885413	245.4845048	35	37	61	11	22	234	720	940	613	1251	991	middle
7	hsa-miR-152-3p	TCAGTGCATGACAGAACTTGG	up	3.948929124	1.981461474	9.2504E-05	237.9770457	939.7544867	157.4908829	520.6883852	269.9357642	87.91876471	153.8514315	709.4345101	1113.428162	1115.37156	987.0724914	829.1291803	884.0910167	43	203	128	13	34	579.5	2899.5	4763.5	2717	5580	3569	high
8	hsa-miR-24-3p_R-2	TGGCTCAGTTCAGCAGGAAC	up	3.211760849	1.683364473	0.000104854	444.8212663	1428.659528	423.0278368	555.3154453	413.339139	361.8195317	470.6043788	1565.775217	1527.771666	1782.463734	1276.255305	1053.053495	1366.637753	115.5	216.5	196	53.5	104	1279	3978.5	7612.5	3513	7087	5517	high
9	hsa-miR-192-5p	CTGACCTATGAATTGACAGCC	up	16.00828109	4.0007465	0.000124817	510.966098	8179.688923	512.7610143	351.4005358	902.5977117	426.0678598	362.0033683	7219.827477	10063.67024	9501.204882	5027.094443	8774.207544	8492.128953	140	137	428	63	80	5897.5	26207	40577.5	13837.5	59050	34282	high
10	hsa-miR-423-5p	TGAGGGGCAGAGAGCGAGACTTT	up	3.590857431	1.844328374	0.00022117	1007.527057	3617.886018	454.1597555	589.9425054	797.1540538	1399.937254	1796.441715	3967.69154	3180.729598	2865.288501	3288.546262	5193.944534	3211.115677	124	230	378	207	397	3241	8283	12237	9052	34955	12963	high
11	hsa-miR-664a-5p_R-2	ACTGGCTAGGGAAAATGATTGG	up	inf	inf	0.000222406	0	60.17754585	0	0	0	0	0	78.34997178	76.03337684	53.15195634	45.04857892	66.12230918	42.35908206	0	0	0	0	0	64	198	227	124	445	171	middle
12	hsa-miR-151b_R+3	TCGAGGAGCTCACAGTCTAGT	up	3.288938771	1.71762215	0.000298643	1066.449536	3507.487225	748.9973387	1477.421231	1561.620574	612.049862	932.1586734	3207.45197	4005.000524	4002.553047	4291.78538	1985.749528	3552.382901	204.5	576	740.5	90.5	206	2620	10429.5	17094	11813.5	13364	14340.66667	high
13	hsa-miR-28-3p	CACTAGATTGTGAGCTCCTGGA	up	6.455401294	2.690506782	0.000367726	74.10482202	478.376364	142.8405683	71.81908761	94.89929211	33.8149095	27.15025262	356.2475279	610.1870495	527.77317	297.1753029	447.7000395	631.175094	39	28	45	5	6	291	1589	2254	818	3013	2548	middle
14	hsa-miR-501-3p	AATGCACCCGGGCAAGGATTCT	up	4.565748478	2.190851385	0.000424637	58.92513104	269.0373274	73.25157346	38.47451122	160.27436	0	22.62521052	247.2920984	303.7495004	224.4714044	271.9868502	236.3562992	330.3678115	20	15	76	0	5	202	791	958.6666667	748.6666667	1590.666667	1333.666667	middle
15	hsa-let-7i-5p	TGAGGTAGTAGTTTGTGCTGTT	up	2.715859899	1.441409058	0.000506117	1681.166847	4565.813624	1245.276749	1962.200072	1798.868804	919.7655385	2479.723073	4791.590462	4108.682402	4518.150438	6542.216204	3404.927449	4029.314788	340	765	853	136	548	3914	10699.5	19296	18008	22915	16266	high
16	hsa-miR-100-5p	AACCCGTAGATCCGAACTTGTG	up	1.940167481	0.956181196	0.000518216	1141.755138	2215.196191	939.4514297	993.9248732	889.9444727	1663.693548	1221.761368	2314.384713	2433.452066	2491.35161	1685.870407	2510.121728	1855.996622	256.5	387.5	422	246	270	1890.5	6337	10640	4640.5	16893	7492.5	high
18	hsa-miR-135a-5p	TATGGCTTTTTATTCCTATGTGA	up	3.466307446	1.793399621	0.000961498	15.38188264	53.31833434	12.81902536	16.6722882	15.81654869	20.2889457	11.31260526	48.96873236	64.89717519	76.80106466	39.78080155	45.98843751	43.47379474	3.5	6.5	7.5	3	2.5	40	169	328	109.5	309.5	175.5	middle
20	hsa-miR-27b-5p	AGAGCTTAGCTGATTGGTGAAC	up	26.39499967	4.722192743	0.00118532	3.077960898	81.24277689	0	15.38980449	0	0	0	48.96873236	134.4024338	74.92786797	55.58413367	93.31418015	80.25931337	0	6	0	0	0	40	350	320	153	628	324	middle
21	hsa-miR-455-3p_R+1	GCAGTCCATGGGCATATACACT	up	11.12730341	3.476032108	0.001313513	13.41221977	149.2418389	21.97547204	28.21464156	16.87098526	0	0	166.49369	142.0825729	228.0616981	102.4491876	76.5235713	179.8403133	6	11	8	0	0	136	370	974	282	515	726	middle
22	hsa-miR-345-5p_R+1	GCTGACTCCTAGTCCAGGGCTCT	up	3.08338927	1.624517038	0.001315979	35.97083222	110.9120781	21.97547204	64.12418537	48.50408264	0	45.25042104	148.1304154	91.00964804	106.0697631	73.02229326	105.7956947	141.4446541	6	25	23	0	10	121	237	453	201	712	571	middle
23	hsa-miR-197-3p	TTCACCACCTTCTCCACCCAGC	down	0.094767004	-3.399471362	0.001324581	83.39044794	7.902662909	91.56446683	69.2541202	50.61295579	101.4447285	104.0759684	9.793746472	4.992090399	5.151290923	17.07486459	0	10.40398507	25	27	24	15	23	8	13	22	47	0	42	middle
24	hsa-miR-514a-5p_R-3	TACTCTGGAGAGTGACAATC	up	inf	inf	0.001351563	0	14.47168802	0	0	0	0	0	15.91483802	8.64015646	22.01006121	7.447547322	17.45926141	15.35826367	0	0	0	0	0	13	22.5	94	20.5	117.5	62	middle
25	hsa-miR-1301-3p_R-2	TTGCAGCTGCCTGGGAGTGACT	up	25.37868384	4.665545347	0.001465878	2.108873158	53.52042515	0	0	10.54436579	0	0	37.95076758	69.12125168	65.09358529	17.43815958	66.12230918	65.39647756	0	0	5	0	0	31	180	278	48	445	264	middle
26	hsa-miR-106b-3p	CCGCACTGTGGGTACTTGCTGC	up	7.523884393	2.911477681	0.001644976	27.51260927	207.0016915	0	61.55921795	12.65323895	0	63.35058945	284.0186477	107.5219471	180.5293319	167.115696	321.9933573	180.831169	0	24	6	0	14	232	280	771	460	2167	730	middle
27	hsa-miR-99b-5p	CACCCGTAGAACCGACCTTGCG	up	2.214348799	1.14688249	0.00205401	2005.613283	4441.127363	2058.369214	2403.374468	1659.683175	2069.472462	1837.167094	3126.653561	4724.437552	3990.143119	5680.480484	5633.769332	3491.280132	562	937	787	306	406	2554	12303	17041	15636	37915	14094	high
28	hsa-miR-505-3p_L-1R+2	GTCAACACTTGCTGGTTTCCTCT	up	6.67322929	2.738385075	0.002226098	10.25522029	68.43543638	51.27610143	0	0	0	0	84.47106332	54.14498048	92.02078784	58.8537886	38.6332593	82.48873874	14	0	0	0	0	69	141	393	162	260	333	middle
29	hsa-miR-574-3p	CACGCTCATGCACACACCCACA	up	4.193482765	2.068148927	0.002234797	54.15945456	227.1167392	18.31289337	87.2088921	29.52422421	0	135.7512631	126.0944858	258.0526729	342.7949959	269.9281786	165.6772466	200.1528556	5	34	14	0	30	103	672	1464	743	1115	808	middle
30	hsa-miR-421	ATCAACAGACATTAATTGGGCGC	up	4.497697842	2.169186743	0.002308924	10.06957147	45.28988988	0	0	23.19760474	0	27.15025262	39.17498589	58.36905697	37.69808357	57.03731364	25.70597638	53.75392284	0	0	11	0	6	32	152	161	157	173	217	middle
31	hsa-miR-132-3p	TAACAGTCTACAGCCATGGTCG	down	0.454156257	-1.138739338	0.00251622	76.47034062	34.72948367	95.2270455	61.55921795	67.48394106	81.15578281	76.92571576	36.72654927	2.304041723	38.86883151	44.68528393	60.77308866	25.01910694	26	24	32	12	17	30	6	166	123	409	101	middle
32	hsa-miR-194-5p	TGTAACAGCAACTCCATGTGGA	up	6.711102413	2.746549773	0.002640919	198.1349032	1329.703627	320.4756339	201.3499421	224.5949913	27.0519276	217.202021	875.9282001	1829.025121	1883.96758	669.189374	1080.616839	1639.494647	87.5	78.5	106.5	4	48	715.5	4763	8046	1842	7272.5	6618.5	high
33	hsa-miR-194-5p_R+1	TGTAACAGCAACTCCATGTGGAA	up	10.84358419	3.438769793	0.002966823	285.1804553	3092.378277	294.8375832	303.9486386	521.9461066	74.39280091	230.7771473	1601.889657	4290.509694	4550.463081	1630.104626	2776.616923	3704.685682	80.5	118.5	247.5	11	51	1308.5	11173	19434	4487	18686.5	14955.5	high
34	hsa-miR-92b-3p	TATTGCACTCGTCCCGGCCTCC	down	0.390092892	-1.358110384	0.003164369	169.3144965	66.04838161	201.441827	135.943273	111.7702774	216.4154208	181.0016841	66.10778869	58.75306393	43.55182325	132.9659668	47.10285845	47.80878852	55	53	53	32	40	54	153	186	366	317	193	middle
35	hsa-miR-30a-3p	CTTTCAGTCGGATGTTTGCAGC	up	3.194584522	1.675628311	0.003375678	2172.080997	6938.896334	1432.068261	4142.422375	2792.148061	493.6976788	2000.06861	6609.55465	7747.340292	7892.480142	10533.01168	3409.830901	5441.160333	391	1615	1324	73	442	5399	20175	33707	28993	22948	21965.5	high
36	hsa-miR-342-5p	AGGGGTGCTATCTGTGATTGA	up	inf	inf	0.00393103	0	15.38687056	0	0	0	0	0	6.121091545	13.44024338	29.03454884	14.89509464	13.96740913	14.86283581	0	0	0	0	0	5	35	124	41	94	60	middle
37	hsa-miR-514a-3p	ATTGACACTTCTGTGAGTAGA	up	17.46928454	4.126748618	0.003977787	9.698306393	169.422474	0	21.80222303	6.326619474	0	20.36268947	170.166345	127.1063017	126.0895528	69.02604835	250.6704171	273.4761789	0	8.5	3	0	4.5	139	331	538.5	190	1687	1104	middle
38	hsa-miR-148b-3p	TCAGTGCATCACAGAACTTTGT	up	2.3562035	1.236464147	0.004255465	321.8846151	758.4256567	217.9234311	564.2928312	345.8551979	155.5485837	325.8030315	529.4744187	614.2191225	897.1441441	585.268231	820.8824653	1103.565559	59.5	220	164	23	72	432.5	1599.5	3831.5	1611	5524.5	4455	high
39	hsa-miR-199a-3p_R-1	ACAGTAGTCTGCACATTGGTT	up	5.716476643	2.515126214	0.004657544	61.93606751	354.0560832	39.06750585	44.45943519	59.75140615	74.39280091	92.00918944	177.9197276	387.4630163	553.4515747	180.315414	370.3839911	454.8027758	10.66666667	17.33333333	28.33333333	11	20.33333333	145.3333333	1009	2363.666667	496.3333333	2492.666667	1836	middle
40	hsa-miR-1271-5p	CTTGGCACCTAGCAAGCACTCA	up	11.82402088	3.563648818	0.004673753	2.564967415	30.32822828	0	12.82483707	0	0	0	46.52029574	51.07292485	24.58570668	21.79769948	25.11161854	12.88112437	0	5	0	0	0	38	133	105	60	169	52	middle
41	hsa-miR-25-3p	CATTGCACTTGTCTCGGTCTGA	up	2.28485351	1.192101672	0.004782622	307.9135637	703.5373868	263.7056645	477.0839391	362.7261832	169.0745475	266.9774841	456.6334293	988.8179059	876.6560552	547.4855519	548.2951031	803.3362755	72	186	172	25	59	373	2575	3744	1507	3690	3243	high
42	hsa-miR-331-5p_R-2	CTAGGTATGGTCCCAGGGAT	up	inf	inf	0.004983137	0	17.16836624	0	0	0	0	0	30.60545773	14.20825729	4.44884216	20.70781451	19.91098748	13.1288383	0	0	0	0	0	25	37	19	57	134	53	middle
43	hsa-miR-509-3p_R+1	TGATTGGTACGTCTGTGGGTAGA	up	inf	inf	0.005032787	0	21.41694245	0	0	0	0	0	35.91040373	18.5603361	14.82947387	4.843933218	28.43011646	25.92739136	0	0	0	0	0	29.33333333	48.33333333	63.33333333	13.33333333	191.3333333	104.6666667	middle
44	hsa-miR-98-5p	TGAGGTAGTAAGTTGTATTGTT	up	3.828703105	1.936855792	0.005340877	126.1015847	482.805529	95.2270455	197.5024909	274.5752852	40.57789141	22.62521052	328.0905068	698.9694572	641.0313254	579.3828522	182.6164449	466.7425872	26	77	130.2	6	5	268	1820.2	2737.7	1594.8	1229	1884.2	middle
45	hsa-miR-99a-5p_R-1	AACCCGTAGATCCGATCTTGT	up	1.82807674	0.870326634	0.00562359	4925.062466	9003.392135	4085.60651	5421.058631	5088.71093	4930.213806	5099.722451	9392.814976	7334.916824	11446.16843	7113.134283	11820.73722	6912.581078	1115.5	2113.5	2413	729	1127	7672.5	19101	48884	19579.5	79553	27905.5	high
46	hsa-miR-532-3p	CCTCCCACACCCAAGGCTTGCA	up	inf	inf	0.0056409	0	18.12761754	0	0	0	0	0	20.81171125	33.02459802	18.73196699	18.16474957	3.417557553	14.61512188	0	0	0	0	0	17	86	80	50	23	59	middle
47	hsa-miR-423-3p	AGCTCGGTCTGAGGCCCCTCAGT	up	1.719994489	0.782403943	0.005775521	702.0603449	1207.539924	750.828628	654.0666908	482.9319532	554.5645159	1067.909936	1257.272203	864.3996529	1234.202475	1106.959839	1577.277106	1205.12827	205	255	229	82	236	1027	2251	5271	3047	10615	4865	high
48	hsa-let-7d-5p	AGAGGTAGTAGGTTGCATAGTT	up	3.39240098	1.762306706	0.005995887	973.2316407	3301.591971	597.0003237	1336.348023	1543.695152	331.3861131	1057.728592	1917.737981	4743.445896	4419.573462	4191.334315	1713.087871	2824.372303	163	521	732	49	233.75	1566.5	12352.5	18875	11537	11529	11401.75	high
49	hsa-miR-125a-3p_R-1	ACAGGTGAGGTTCTTGGGAGC	up	16.65041694	4.057486399	0.00605622	2.53064779	42.13634083	0	0	12.65323895	0	0	30.60545773	68.35323777	39.33713068	48.68152884	6.38934673	59.45134324	0	0	6	0	0	25	178	168	134	43	240	middle
50	hsa-miR-146a-5p	TGAGAACTGAATTCCATGGGTT	up	11.0926054	3.471526357	0.006184104	50.01882652	554.8391052	25.63805071	102.5986966	33.74197053	33.8149095	54.30050524	334.8237075	615.7551504	489.4897124	282.6435033	1053.053495	553.269063	7	40	16	5	12	273.5	1603.5	2090.5	778	7087	2233.5	high
51	hsa-miR-24-1-5p_L+2R-2	GGTGCCTACTGAGCTGATATCA	up	6.739733622	2.752691572	0.00626812	3.590954381	24.20207597	0	17.9547719	0	0	0	22.03592956	24.96045199	21.07346287	30.88007426	39.82197497	6.440562184	0	7	0	0	0	18	65	90	85	268	26	middle
52	hsa-miR-877-5p_R+4	GTAGAGGAGATGGCGCAGGGGACA	up	inf	inf	0.006374188	0	19.04581878	0	0	0	0	0	22.03592956	15.7442851	16.6246207	11.62543972	38.33608038	9.908557206	0	0	0	0	0	18	41	71	32	258	40	middle
53	hsa-miR-9-5p	TCTTTGGTTATCTAGCTGTATGA	down	0.301343436	-1.730519456	0.006540948	921.1282032	277.5759375	843.6139544	802.8348008	572.9105413	1431.497836	954.7838839	534.1672555	185.0913517	137.3677579	106.2032358	591.7327549	110.8932694	230.3333333	313	271.6666667	211.6666667	211	436.3333333	482	586.6666667	292.3333333	3982.333333	447.6666667	high
54	hsa-miR-532-5p	CATGCCTTGAGTGTAGGACCGT	up	2.24763407	1.168407174	0.006645016	431.4571474	969.7577841	399.2210754	661.761593	719.1257469	182.6005113	194.5768105	888.7824923	976.1456765	852.0703485	960.1886621	1054.3908	1086.968725	109	258	341	27	43	726	2542	3639	2643	7096	4388	high
55	hsa-let-7e-5p	TGAGGTAGGAGGTTGTATAGTT	up	3.252529059	1.701561946	0.006751268	849.3525301	2762.543785	515.5079483	984.4344938	1626.468423	324.6231312	795.7286539	1844.835781	3612.69902	3025.684871	4446.100983	1715.519785	1930.422272	140.75	383.8	771.25	48	175.85	1506.95	9407.9	12922.01667	12238.26667	11545.36667	7792.95	high
56	hsa-miR-455-5p	TATGTGCCTTTGGACTACATCG	up	7.689194772	2.942832524	0.006809243	12.40604748	95.39251546	18.31289337	20.51973932	23.19760474	0	0	99.16168303	67.96923082	100.450173	26.52053437	108.3217155	169.9317561	5	8	11	0	0	81	177	429	73	729	686	middle
57	hsa-miR-140-3p_L-1R+2	ACCACAGGGTAGAACCACGGAC	up	1.762887931	0.817940764	0.006933922	647.4283036	1141.343543	501.7732782	823.3545401	626.3353279	466.6457512	819.0326208	1161.783175	809.4866585	832.8700824	1464.805405	1446.815561	1132.300375	137	321	297	69	181	949	2108	3557	4032	9737	4571	high
58	hsa-miR-330-3p	GCAAAGCACACGGCCTGCAGAGA	up	5.318842207	2.411112237	0.007253882	9.313361521	49.53630035	0	12.82483707	33.74197053	0	0	28.15702111	24.57644504	48.234815	42.14221899	77.56369751	76.54360442	0	5	16	0	0	23	64	206	116	522	309	middle
59	hsa-miR-26b-3p_R+2	CCTGTTCTCCATTACTTGGCTCT	up	inf	inf	0.007352762	0	7.98016618	0	0	0	0	0	6.121091545	14.9762712	5.151290923	11.62543972	2.823199718	7.183703974	0	0	0	0	0	5	39	22	32	19	29	middle
61	hsa-miR-107_R-2	AGCAGCATTGTACAGGGCTAT	up	2.538575228	1.344019013	0.008026289	109.1632165	277.1190371	79.35587125	102.5986966	128.6412626	22.543273	212.6769789	199.1395116	359.942518	340.5315499	203.8084901	175.3355614	383.9565917	21.66666667	40	61	3.333333333	47	162.6666667	937.3333333	1454.333333	561	1180	1550	middle
62	hsa-miR-221-3p	AGCTACATTGTCTGCTGGGTTTC	up	1.635043505	0.709329023	0.008208445	1040.32547	1700.977403	996.2213991	1118.325793	1313.827977	777.7429186	995.5092628	1365.003415	1427.737854	1488.723077	1503.314674	2134.190397	2286.895003	272	436	623	115	220	1115	3718	6358	4138	14363	9232	high
63	hsa-miR-146b-5p_R+1	TGAGAACTGAATTCCATAGGCTGT	up	2.925856468	1.548858998	0.00832547	114.1666413	334.035206	109.8773602	146.2031426	147.6211211	81.15578281	85.97579997	175.6753273	447.1760977	441.9573462	254.6697889	466.1251324	218.6075434	30	57	70	12	19	143.5	1164.5	1887.5	701	3137	882.5	middle
64	hsa-let-7b-5p	TGAGGTAGTAGGTTGTGTGGTT	up	3.288530111	1.71744288	0.008425481	5254.260119	17278.79261	4252.25384	6595.386212	7916.709835	2515.829267	4991.12144	9060.031632	26182.17012	24401.07973	17268.25863	9105.363918	17655.85166	1161	2571.333333	3754	372	1103	7400.666667	68181.5	104211.5	47532.33333	61278.66667	71275.16667	high
65	hsa-miR-501-5p	AATCCTTTGTCCCTGGGTGAGA	up	inf	inf	0.008492088	0	7.323138941	0	0	0	0	0	9.793746472	7.296132121	12.87822731	6.539309844	0	7.431417904	0	0	0	0	0	8	19	55	18	0	30	middle
66	hsa-miR-424-3p	CAAAACGTGAGGCGCTGCTAT	up	6.826085634	2.771058513	0.00852246	39.34158395	268.549021	18.31289337	64.12418537	46.39520948	0	67.87563155	290.1397392	313.3496743	275.3599148	482.8190435	77.71228697	171.9134675	5	25	22	0	15	237	816	1176	1329	523	694	middle
67	hsa-miR-425-5p	AATGACACGATCACTCCCGTTGA	up	6.149407659	2.62044745	0.008769681	8.804247577	54.14090749	0	0	16.87098526	0	27.15025262	8.569528163	42.24076491	82.65480435	45.04857892	67.31102485	79.02074372	0	0	8	0	6	7	110	353	124	453	319	middle
68	hsa-miR-103a-3p	AGCAGCATTGTACAGGGCTATGA	up	2.100572016	1.070782248	0.008791305	873.1107783	1834.032068	603.1046215	1270.941354	1025.966791	779.9972459	685.5438787	849.8115428	2178.023441	2244.987219	1351.27572	2112.273452	2267.821031	164.6666667	495.5	486.5	115.3333333	151.5	694.1666667	5671.833333	9587.833333	3719.5	14215.5	9155	high
69	hsa-miR-2355-3p_L-1R+1	TTGTCCTTGCTGTTTGGAGATA	up	inf	inf	0.008997092	0	5.454079196	0	0	0	0	0	7.345309854	5.760104306	3.980542986	9.445669775	0	6.192848254	0	0	0	0	0	6	15	17	26	0	25	low
71	hsa-miR-22-3p	AAGCTGCCAGTTGAAGAACTGT	up	3.265978453	1.707515273	0.01112537	1500.065351	4899.181114	1172.025175	1933.985431	1845.264013	1467.567073	1081.485063	2908.742702	4492.497352	6393.220334	2629.529147	8315.066116	4656.031031	320	754	875	217	239	2376	11699	27304	7238	55960	18796	high
72	hsa-miR-671-3p	TCCGGTTCTCAGGGCTCCACC	up	inf	inf	0.011268671	0	9.180593211	0	0	0	0	0	6.121091545	18.04832683	2.809795049	4.722834887	10.25267266	13.1288383	0	0	0	0	0	5	47	12	13	69	53	middle
73	hsa-miR-193a-5p	TGGGTCTTTGCGGGCGAGATGA	up	9.433354808	3.237770931	0.011622766	31.57049749	297.8157042	0	33.34457639	61.15732158	0	63.35058945	258.3100632	138.6265103	394.7762043	68.29945837	431.9495568	494.9324324	0	13	29	0	14	211	361	1686	188	2907	1998	middle
74	hsa-miR-1307-3p_R+1	ACTCGGCGTGGCGTCGGTCGTGG	up	6.914936525	2.789716008	0.011803247	50.65798916	350.2967795	62.26383745	30.77960898	33.74197053	54.10385521	72.40067366	324.4178519	251.9085617	266.69638	149.6775364	697.6275092	411.452838	17	12	16	8	16	265	656	1139	412	4695	1661	middle
75	hsa-miR-185-5p	TGGAGAGAAAGGCAGTTCCTGA	up	2.930260946	1.551029146	0.011816406	267.2481172	783.1067208	307.6566086	256.4967415	297.3511153	108.2077104	366.5284104	433.3732814	583.6905697	780.6547244	664.8298341	1407.736533	828.3553824	84	100	141	16	81	354	1520	3334	1830	9474	3344	high
76	hsa-miR-30c-2-3p	CTGGGAGAAGGCTGTTTACTCT	up	2.893682903	1.532906836	0.01269402	186.5719495	539.8800603	58.60125877	351.4005358	240.41154	101.4447285	181.0016841	684.3380347	511.8812694	442.5427202	934.7580127	361.8153323	303.9449923	16	137	114	15	40	559	1333	1890	2573	2435	1227	high
77	hsa-miR-125b-2-3p_L-2R+2	ACAAGTCAGGCTCTTGGGACCT	up	3.017002666	1.593115971	0.013787454	43.46774654	131.1423072	0	120.5534685	37.95971685	0	58.82554735	177.5116548	80.25745334	174.4414426	135.1457368	101.3380109	118.1595447	0	47	18	0	13	145	209	745	372	682	477	middle
78	hsa-miR-30c-1-3p_R+1	CTGGGAGAGGGTTGTTTACTCCT	up	inf	inf	0.013794188	0	20.2251802	0	0	0	0	0	12.24218309	6.912125168	15.92217194	15.98497962	44.27965873	26.00996267	0	0	0	0	0	10	18	68	44	298	105	middle
79	hsa-miR-615-3p_R-1	TCCGAGCCTGGGTCTCCCTCT	up	21.54418786	4.42922681	0.014620751	2.564967415	55.26013983	0	12.82483707	0	0	0	40.3992042	82.17748811	31.37604471	111.5315623	51.70913167	14.36740795	0	5	0	0	0	33	214	134	307	348	58	middle
80	hsa-miR-125b-5p	TCCCTGAGACCCTAACTTGTGA	down	0.574318048	-0.800078196	0.015041165	2723.352683	1564.070597	2439.277396	2584.20467	1920.12901	3777.125392	2896.026946	1252.37533	1378.776967	2340.67635	1367.2607	1557.068939	1488.265292	666	1007.5	910.5	558.5	640	1023	3590.5	9996.5	3763.5	10479	6008	high
81	hsa-miR-513a-5p_R+4	TTCACAGGGAGGTGTCATTTAT	up	inf	inf	0.015183231	0	2.470912022	0	0	0	0	0	4.896873236	3.264059107	1.404897524	2.906359931	0	2.353282336	0	0	0	0	0	4	8.5	6	8	0	9.5	low
82	hsa-miR-503-5p_R-2_1ss21CA	TAGCAGCGGGAACAGTTCTGA	up	8.999922482	3.169912575	0.015245677	8.90002636	80.09954733	0	12.82483707	0	0	31.67529473	73.45309854	96.76975235	91.78663826	158.3966162	12.630104	47.56107459	0	5	0	0	7	60	252	392	436	85	192	middle
83	hsa-miR-30b-3p_R-2	CTGGGAGGTGGATGTTTACT	up	6.374634	2.672342512	0.01553435	2.53064779	16.13195344	0	0	12.65323895	0	0	12.24218309	25.7284659	11.70747937	19.61792953	2.228841883	25.26682088	0	0	6	0	0	10	67	50	54	15	102	middle
84	hsa-miR-22-5p_R-1	AGTTCTTCAGTGGCAAGCTTT	up	4.219974418	2.077234253	0.015643249	16.43837106	69.36950534	0	58.99425054	23.19760474	0	0	36.72654927	59.52107783	90.38174073	26.88382936	96.43455878	106.269276	0	23	11	0	0	30	155	386	74	649	429	middle
85	hsa-miR-23a-3p_R+1	ATCACATTGCCAGGGATTTCCA	up	1.743943861	0.802353599	0.015669826	354.2733718	617.8328718	305.8253192	403.9823678	325.8209029	507.2236426	228.5146262	344.617454	629.3873972	819.4064811	738.0337749	469.6912794	705.860844	83.5	157.5	154.5	75	50.5	281.5	1639	3499.5	2031.5	3161	2849.5	high
86	hsa-miR-410-3p	AATATAACACAGATGGCCTGT	down	0.154103286	-2.698030474	0.01580587	27.42719099	4.226620244	18.31289337	20.51973932	14.76211211	47.34087331	36.20033683	0	0	0	0	23.62572395	1.733997511	5	8	7	7	8	0	0	0	0	159	7	middle
87	hsa-miR-324-5p_R+1	CGCATCCCCTAGGGCATTGGTGT	up	5.958077676	2.574846932	0.016154615	2.108873158	12.56483008	0	0	10.54436579	0	0	13.4664014	1.920034769	20.3710141	13.07861969	7.726651859	18.82625869	0	0	5	0	0	11	5	87	36	52	76	middle
88	hsa-miR-126-5p	CATTATTACTTTTGGTACGCG	up	9.696395619	3.277448563	0.016342703	27.19624293	263.7055308	21.97547204	0	18.97985842	0	95.02588418	123.6460492	453.1282054	177.9536864	449.7591993	67.60820377	310.1378405	6	0	9	0	21	101	1180	760	1238	455	1252	middle
89	hsa-miR-23b-3p_R+1	ATCACATTGCCAGGGATTACCACT	up	3.673143375	1.87701521	0.016375566	540.4532339	1985.162216	287.5124258	834.8968935	629.4986377	595.1424073	355.2158051	1943.446566	2163.879184	2354.491176	3580.090492	606.0964026	1262.969473	78.5	325.5	298.5	88	78.5	1587.5	5635	10055.5	9854.5	4079	5098.5	high
90	hsa-miR-1269a	CTGGACTGAGCCGTGCTACTGG	up	inf	inf	0.017135239	0	10.01728262	0	0	0	0	0	13.4664014	8.448152983	13.81482566	2.179769948	2.377431341	19.81711441	0	0	0	0	0	11	22	59	6	16	80	middle
91	hsa-miR-361-3p_R-1	TCCCCCAGGTGTGATTCTGATT	up	2.558283473	1.355176132	0.018271702	62.06752412	158.7863211	25.63805071	82.07895727	75.91943369	0	126.7011789	105.2827746	95.23372453	147.2800905	168.568876	267.163847	169.1886143	7	32	36	0	28	86	248	629	464	1798	683	middle
92	hsa-miR-145-3p	GGATTCCTGGAAATACTGTTCT	up	inf	inf	0.018553775	0	9.120687852	0	0	0	0	0	0	2.688048676	13.34652648	10.89884974	10.69844104	17.09226118	0	0	0	0	0	0	7	57	30	72	69	middle
93	hsa-miR-181a-2-3p	ACCACTGACCGTTGACTGTACC	up	3.839650605	1.940975037	0.019854295	7.660582619	29.41396069	0	25.64967415	12.65323895	0	0	11.01796478	37.24867451	22.01006121	47.95493886	38.93043821	19.32168655	0	10	6	0	0	9	97	94	132	262	78	middle
94	hsa-miR-4286_R+1	ACCCCACTCCTGGTACCA	up	inf	inf	0.020010568	0	3.382277157	0	0	0	0	0	0	3.840069538	7.024487622	3.632949913	1.33730513	4.458850743	0	0	0	0	0	0	10	30	10	9	18	low
96	hsa-miR-139-5p	TCTACAGTGCACGTGTCTCCAGT	down	0.348685667	-1.520001033	0.020958005	158.4001872	55.23187493	146.5031469	120.5534685	80.13718001	250.2303303	194.5768105	9.793746472	99.07379407	66.26433323	35.23961416	50.66900546	70.35075616	40	47	38	37	43	8	258	283	97	341	284	middle
97	hsa-miR-497-5p	CAGCAGCACACTGTGGTTTGT	up	inf	inf	0.022349869	0	24.62624999	0	0	0	0	0	20.81171125	8.064146029	51.04461005	12.35202971	11.14420941	44.3407935	0	0	0	0	0	17	21	218	34	75	179	middle
99	hsa-miR-126-3p	TCGTACCGTGAGTAATAATGCG	up	11.59203852	3.535062389	0.023593963	241.5678002	2800.263245	234.4050351	92.33882693	97.00816527	277.2822579	506.8047156	536.2076194	4416.463975	4467.574127	2233.537607	554.6844498	4593.111693	64	36	46	41	112	438	11501	19080	6148	3733	18542	high
100	hsa-miR-204-5p	TTCCCTTTGTCATCCTATGCCT	up	2.156980549	1.109013167	0.024053916	683.6220161	1474.559392	747.1660493	766.925257	754.9765906	710.1130996	438.9290841	931.6301332	2428.459976	1439.785813	803.9718158	1923.193366	1320.315248	204	299	358	105	97	761	6324	6149	2213	12943	5330	high
101	hsa-miR-340-3p_R+1	TCCGTCTCAGTTACTTTATAGCC	up	inf	inf	0.025006506	0	11.01285276	0	0	0	0	0	12.24218309	13.05623643	17.56121905	21.43440449	1.783073506	0	0	0	0	0	0	10	34	75	59	12	0	middle
102	hsa-miR-3928-3p	GGAGGAACCTTGGAGCTTCGGC	up	inf	inf	0.025264039	0	10.05676911	0	0	0	0	0	8.569528163	16.12829206	2.107346287	0	19.16804019	14.36740795	0	0	0	0	0	7	42	9	0	129	58	middle
103	hsa-miR-378d	ACTGGACTTGGAGTCAGAAA	up	inf	inf	0.025383476	0	38.38153203	0	0	0	0	0	86.51142717	23.04041723	22.01006121	3.632949913	58.92810288	36.1662338	0	0	0	0	0	70.66666667	60	94	10	396.5833333	146	middle
104	hsa-miR-3615_R+2	TCTCTCGGCTCCTCGCGGCTCGC	up	inf	inf	0.026289063	0	16.12383751	0	0	0	0	0	33.05389434	6.912125168	11.94162896	16.34827461	0	28.48710197	0	0	0	0	0	27	18	51	45	0	115	middle
105	hsa-miR-135a-2-3p_L-1R+1	TGTAGGGATGGAAGCCATGAAA	up	8.843695207	3.144649304	0.026725227	4.217746316	37.30046288	0	0	21.08873158	0	0	17.13905633	56.06501525	72.3522225	11.62543972	53.49220518	13.1288383	0	0	10	0	0	14	146	309	32	360	53	middle
106	hsa-miR-196b-5p	TAGGTAGTTTCCTGTTGTTGGG	up	2.596051486	1.376318996	0.026998122	66.18385659	171.8166992	21.97547204	135.943273	139.1856284	33.8149095	0	172.6147816	164.7389832	280.1599813	188.1868055	83.50727587	141.692368	6	53	66	5	0	141	429	1196.5	518	562	572	middle
107	hsa-miR-508-5p	TACTCCAGAGGGCGTCACTCATG	up	inf	inf	0.028090274	0	9.645633067	0	0	0	0	0	19.58749294	16.89630597	8.195235559	2.543064939	0	10.651699	0	0	0	0	0	16	44	35	7	0	43	middle
108	hsa-miR-148a-3p	TCAGTGCACTACAGAACTTTGT	up	1.905627118	0.930265849	0.028778684	1882.529457	3587.399184	1474.187916	3506.310456	2028.735978	453.1197874	1950.293147	3388.636279	3490.239203	5528.505908	3349.216525	2455.366513	3312.430674	402.5	1367	962	67	431	2768	9089	23611	9219	16524.5	13372	high
109	hsa-miR-31-5p_R+2	AGGCAAGATGCTGGCATAGCTGA	up	2.726009629	1.446790658	0.029084107	79.97703936	218.0181794	186.7915123	15.38980449	143.4033747	0	54.30050524	238.7225703	158.5948719	201.8369443	73.74888324	310.7005584	324.5052485	51	6	68	0	12	195	413	862	203	2091	1310	middle
110	hsa-miR-125a-5p_R-1	TCCCTGAGACCCTTTAACCTGTG	up	1.695924121	0.762071622	0.029260972	1655.447256	2807.512933	1794.66355	2323.860478	1140.900379	1352.59638	1665.215494	1194.83707	3477.182966	3495.85334	3279.100592	2191.694518	3206.409112	490	906	541	200	368	976	9055	14930	9026	14750	12944	high
111	hsa-miR-510-5p	TACTCAGGAGAGTGGCAATCAC	up	inf	inf	0.030373186	0	4.217957373	0	0	0	0	0	0	4.224076491	7.492786797	6.902604835	0	6.688276114	0	0	0	0	0	0	11	32	19	0	27	low
112	hsa-miR-204-3p	GCTGGGAAGGCAAAGGGACGT	up	7.283768683	2.864685106	0.030804941	150.3540453	1095.144086	139.1779896	94.90379434	276.2623837	182.6005113	58.82554735	794.5176826	858.2555417	574.1347883	277.1940784	1728.838354	2337.924073	38	37	131	27	13	649	2235	2452	763	11635	9438	high
113	hsa-miR-409-3p	GAATGTTGCTCGGTGAACCCCT	up	inf	inf	0.031629868	0	8.844505473	0	0	0	0	0	0	22.27240332	7.726936384	6.176014853	9.212546448	7.679131835	0	0	0	0	0	0	58	33	17	62	31	middle
114	hsa-miR-23b-5p	TGGGTTCCTGGCATGCTGATTT	up	inf	inf	0.031658354	0	25.57247209	0	0	0	0	0	0	47.23285531	45.89331913	27.61041934	0	32.69823878	0	0	0	0	0	0	123	196	76	0	132	middle
115	hsa-miR-589-5p_R-1	TGAGAACCACGTCTGCTCTGA	up	6.037571263	2.593968313	0.033012303	2.564967415	15.48617355	0	12.82483707	0	0	0	0	26.11247286	14.04897524	7.629194818	27.04328151	18.0831169	0	5	0	0	0	0	68	60	21	182	73	middle
116	hsa-miR-219a-2-3p	AGAATTGTGGCTGGACATCTGT	down	0.114755654	-3.123362857	0.033839294	32.00452773	3.672700514	40.28836541	35.90954381	29.52422421	0	54.30050524	6.121091545	2.688048676	2.575645461	5.44942487	0	5.201992533	11	14	14	0	12	5	7	11	15	0	21	middle
117	hsa-miR-370-3p	GCCTGCTGGGGTGGAACCTGGT	down	0.258147375	-1.953733166	0.034060427	34.96368238	9.025782833	32.96320806	23.08470673	12.65323895	60.86683711	45.25042104	7.345309854	0	0	6.539309844	31.35237581	8.917701485	9	9	6	9	10	6	0	0	18	211	36	middle
118	hsa-miR-454-3p	TAGTGCAATATTGCTTATAGGGT	up	5.686605813	2.507567802	0.036514651	2.53064779	14.39079643	0	0	12.65323895	0	0	23.26014787	23.80843113	20.13686452	13.44191468	0	5.697420393	0	0	6	0	0	19	62	86	37	0	23	middle
121	hsa-miR-28-5p_R-1	AAGGAGCTCACAGTCTATTGA	up	2.247247823	1.168159232	0.037473854	92.10495974	206.9826703	139.1779896	156.4630123	97.00816527	0	67.87563155	68.55622531	228.4841375	313.0579983	156.2168463	177.4158138	298.1650006	38	61	46	0	15	56	595	1337	430	1194	1203.666667	middle
122	hsa-miR-574-5p	TGAGTGTGTGTGTGTGAGTGTGT	up	2.226218254	1.154595038	0.03849117	45.18100213	100.5827717	21.97547204	41.03947864	29.52422421	33.8149095	99.55092628	52.64138729	155.9068232	88.04024486	66.8462784	85.73611775	154.3257785	6	16	14	5	22	43	406	376	184	577	623	middle
123	hsa-miR-185-3p_R-1	AGGGGCTGGCTTTCCTCTGGT	up	inf	inf	0.038973047	0	4.474110925	0	0	0	0	0	0	7.296132121	4.917141335	4.722834887	0	9.908557206	0	0	0	0	0	0	19	21	13	0	40	low
124	hsa-miR-363-3p	AATTGCACGGTATCCATCTGTA	up	2.003310651	1.002386156	0.039164192	414.0257322	829.4221592	732.5157346	436.0444605	569.3957527	114.9706923	217.202021	887.558274	961.5534122	1250.358797	924.5857529	314.8610633	637.6156562	200	170	270	17	48	725	2504	5340	2545	2119	2574	high
125	hsa-miR-218-5p_R+2	TTGTGCTTGATCTAACCATGTGA	up	4.285979238	2.099624861	0.039672139	4.428633632	18.9810318	0	0	22.14316816	0	0	18.97538379	24.57644504	32.31264306	7.084252331	7.65235713	23.28510943	0	0	10.5	0	0	15.5	64	138	19.5	51.5	94	middle
126	hsa-miR-99b-3p_R+1	CAAGCTCGTGTCTGTGGGTCCGT	up	1.550109194	0.632369847	0.040127363	60.9428088	94.46800823	40.28836541	76.94902244	31.63309737	74.39280091	81.45075787	101.6101196	66.433203	115.4357466	109.3517924	65.23077243	108.7464153	11	30	15	11	18	83	173	493	301	439	439	middle
127	hsa-miR-450a-5p	TTTTGCGATGTGTTCCTAATAT	up	2.924568086	1.548223576	0.041962509	140.8340122	411.8786574	29.30062939	329.5983128	228.8127377	16.90745475	99.55092628	666.5868693	326.7899177	277.7014106	743.4831998	187.817076	268.8934712	8	128.5	108.5	2.5	22	544.5	851	1186	2046.5	1264	1085.5	middle
128	hsa-miR-145-5p	GTCCAGTTTTCCCAGGAATCCCT	down	0.377564349	-1.40520555	0.042218775	59.79709414	22.5772509	29.30062939	41.03947864	56.93957527	67.62981901	104.0759684	31.82967603	21.50438941	30.90774554	8.719079792	19.46521911	23.0373955	8	16	27	10	23	26	56	132	24	131	93	middle
130	hsa-miR-181d-5p	AACATTCATTGTTGTCGGTGGGT	up	4.211764439	2.07442475	0.043828469	5.771451831	24.30799558	18.31289337	0	10.54436579	0	0	19.58749294	8.448152983	19.43441575	10.89884974	51.56054222	35.91851987	5	0	5	0	0	16	22	83	30	347	145	middle
132	hsa-miR-708-3p_R-2	CAACTAGACTGTGAGCTTCT	up	inf	inf	0.04532241	0	10.16584261	0	0	0	0	0	0	10.36818775	1.404897524	8.355784801	25.260208	15.6059776	0	0	0	0	0	0	27	6	23	170	63	middle
133	hsa-miR-29c-5p	TGACCGATTTCTCCTGGTGTTC	up	3.619376194	1.855741068	0.045542345	8.74278842	31.64344027	0	0	21.08873158	0	22.62521052	46.52029574	22.27240332	42.38107532	55.94742866	2.674610259	20.06482834	0	0	10	0	5	38	58	181	154	18	81	middle
134	hsa-miR-196a-5p	TAGGTAGTTTCATGTTGTTGGG	up	4.035328351	2.012686069	0.045562622	46.96378797	189.5143051	25.63805071	98.75124547	99.11703843	0	11.31260526	91.20426402	362.8865713	328.9801703	182.0107907	32.54109148	139.4629427	7	38.5	47	0	2.5	74.5	945	1405	501	219	563	middle
138	hsa-miR-548ba	AAAGGTAACTGTGATTTTTGCT	up	inf	inf	0.046623167	0	5.125507634	0	0	0	0	0	11.01796478	7.680139075	0	9.082374783	0	2.972567162	0	0	0	0	0	9	20	0	25	0	12	middle
139	hsa-miR-320c_R+2_1ss20TA	AAAAGCTGGGTTGAGAGGGAAA	up	2.995839953	1.582960553	0.047464631	10.46796031	31.36033372	9.94128497	9.527021826	10.84563338	4.830701358	17.19515999	50.83420788	31.13199232	15.25651812	8.885157502	58.32136259	23.73276389	2.714285714	3.714285714	5.142857143	0.714285714	3.8	41.52380952	81.07142857	65.15714286	24.45714286	392.5	95.80714286	middle
141	hsa-miR-194-3p	CCAGTGGGGCTGCTGTTATCTG	up	inf	inf	0.048813977	0	15.70317698	0	0	0	0	0	15.91483802	21.88839636	39.57128027	0	0	16.84454725	0	0	0	0	0	13	57	169	0	0	68	middle
142	hsa-miR-2110_R+1	TTGGGGAAACGGCCGCTGAGTGA	up	39.13231964	5.290288726	0.049202156	2.53064779	99.03011821	0	0	12.65323895	0	0	52.64138729	46.46484141	68.37167952	40.68903903	279.4967721	106.51699	0	0	6	0	0	43	121	292	112	1881	430	middle
143	hsa-miR-29a-3p_R-1	TAGCACCATCTGAAATCGGTT	down	0.749683425	-0.415646589	0.049486364	2215.824241	1661.166706	1952.154433	2581.639703	2371.427866	1680.601002	2493.298199	1732.881016	888.4000875	1965.334562	1684.326404	2108.707305	1587.350864	533	1006.5	1124.5	248.5	551	1415.5	2313.5	8393.5	4636.25	14191.5	6408	high
144	hsa-miR-155-5p_R-1	TTAATGCTAATCGTGATAGGGGT	up	inf	inf	0.049583422	0	24.87418308	0	0	0	0	0	64.88357038	35.32863975	29.03454884	8.355784801	0	11.64255472	0	0	0	0	0	53	92	124	23	0	47	middle
145	hsa-miR-30c-5p_R+1	TGTAAACATCCTACACTCTCAGCT	up	3.011335973	1.590403678	0.049916378	2863.765583	8623.76032	2547.323467	6679.175148	2351.393571	1274.822088	1466.113642	3377.618315	11286.34838	8562.186987	17929.39496	3940.14668	6646.866602	695.5	2604	1115	188.5	324	2759	29391	36567.16667	49352.16667	26517	26832.83333	high
146	hsa-miR-320a-3p	AAAAGCTGGGTTGAGAGGGCGA	up	2.940638965	1.556129669	0.051546031	4131.182592	12148.3165	4123.017135	4555.50427	4061.288012	1418.293919	6497.809626	5718.964979	9968.655945	8986.756496	8212.449357	27205.14496	12797.92729	1125.714286	1776.047619	1925.809524	209.7142857	1435.966667	4671.52381	25959.57143	38380.40714	22605.45714	183089.3333	51664.14048	high
147	hsa-miR-205-5p	TCCTTCATTCCACCGGAGTCTG	down	0.439300727	-1.186719207	0.051973375	341.4452009	149.9971251	395.5584967	587.377538	234.0849205	209.6524389	280.5526104	304.8303589	135.1704477	176.7829385	78.83501312	0	204.3639924	108	229	111	31	62	249	352	755	217	0	825	middle
148	hsa-miR-361-5p	TTATCAGAATCTCCAGGGGTAC	up	2.394169735	1.259525436	0.052083951	184.2676341	441.1679927	238.0676138	243.6719044	202.4518232	114.9706923	122.1761368	637.817739	312.1976534	386.5809688	842.4810849	193.4634754	274.4670346	65	95	96	17	27	521	813	1651	2319	1302	1108	high
149	hsa-miR-5585-3p_L-1R-1_1ss5AG	TGAGTAGCTGGGACTACAGG	down	0.173353282	-2.528212943	0.053681318	55.25086378	9.577918579	69.58899479	41.03947864	18.97985842	114.9706923	31.67529473	12.24218309	0	0	0	27.63763934	17.58768904	19	16	9	17	7	10	0	0	0	186	71	middle
150	hsa-miR-96-5p_R-2	TTTGGCACTAGCACATTTTTG	down	0.302592406	-1.724552314	0.054193286	3106.707038	940.0659567	2985.001619	2334.120347	1895.876969	5187.207118	3131.329136	95.4890281	51.07292485	66.26433323	310.9805126	4889.187553	227.4013879	815	910	899	767	692	78	133	283	856	32904	918	high
151	hsa-miR-509-3-5p	TACTGCAGACGTGGCAATCATG	up	inf	inf	0.055115308	0	27.36999803	0	0	0	0	0	73.45309854	26.11247286	40.74202821	5.086129879	0	18.82625869	0	0	0	0	0	60	68	174	14	0	76	middle
152	hsa-miR-542-3p	TGTGACAGATTGATAACTGAAA	up	3.201874382	1.678916708	0.055489202	42.68051751	136.6576556	0	156.4630123	56.93957527	0	0	51.41716898	170.8830944	84.05970187	114.4379223	258.6942478	140.4537984	0	61	27	0	0	42	445	359	315	1741	567	middle
153	hsa-miR-3909	TGTCCTCTAGGGCCTGCAGTCT	up	inf	inf	0.055642617	0	10.69521381	0	0	0	0	0	6.121091545	16.12829206	0	3.632949913	29.12353393	9.165415415	0	0	0	0	0	5	42	0	10	196	37	middle
154	hsa-miR-508-3p	TGATTGTAGCCTTTTGGAGTAGA	up	inf	inf	0.055776212	0	31.20749743	0	0	0	0	0	6.121091545	76.03337684	23.18080915	19.98122452	0	61.92848254	0	0	0	0	0	5	198	99	55	0	250	middle
155	hsa-miR-187-3p_R+1	TCGTGTCTTGTGTTGCAGCCGGA	up	2.700607463	1.433283957	0.056214622	20.88826012	56.41099117	62.26383745	0	42.17746316	0	0	53.8656056	76.80139075	29.97114719	79.19830811	38.93043821	59.69905717	17	0	20	0	0	44	200	128	218	262	241	middle
157	hsa-miR-433-3p	ATCATGATGGGCTCCTCGGTGT	down	0.323300191	-1.629053734	0.057717223	30.2585977	9.782610421	25.63805071	23.08470673	18.97985842	33.8149095	49.77546314	0	0	0	3.269654922	47.25144791	8.174559695	7	9	9	5	11	0	0	0	9	318	33	middle
159	hsa-miR-29b-2-5p_R+1	CTGGTTTCACATGGTGGCTTAGA	up	8.190906666	3.034023155	0.057792743	5.517389836	45.19242519	0	12.82483707	14.76211211	0	0	0	50.30491094	37.93223316	6.176014853	104.1612106	72.58018153	0	5	7	0	0	0	131	162	17	701	293	middle
160	hsa-miR-339-3p_R-2	TGAGCGCCTCGACGACAGAGC	up	2.769657186	1.469707418	0.058886916	22.27758366	61.70126968	32.96320806	23.08470673	14.76211211	40.57789141	0	67.332007	13.44024338	36.05903646	46.86505388	124.5179665	81.99331088	9	9	7	6	0	55	35	154	129	838	331	middle
161	hsa-miR-941	CACCCGGCTGTGTGCACATGTGC	up	inf	inf	0.059420578	0	19.01988647	0	0	0	0	0	6.121091545	2.688048676	10.30258185	18.52804456	55.42386815	21.05568406	0	0	0	0	0	5	7	44	51	373	85	middle
162	hsa-miR-628-3p	TCTAGTAAGAGTGGCAGTCGA	up	2.768868513	1.469296545	0.059497479	9.021004905	24.97797643	0	17.9547719	0	0	27.15025262	40.3992042	28.80052153	23.88325791	26.52053437	24.07149233	6.192848254	0	7	0	0	6	33	75	102	73	162	25	middle
163	hsa-miR-331-3p	GCCCCTGGGCCTATCCTAGAA	up	4.875453653	2.285536465	0.059603152	8.32169418	40.57203428	0	20.51973932	21.08873158	0	0	0	34.94463279	26.69305296	61.03355854	93.01700123	27.74396018	0	8	10	0	0	0	91	114	168	626	112	middle
164	hsa-miR-506-3p_L+1	GTAAGGCACCCTTCTGAGTAGA	up	inf	inf	0.06063665	0	10.80607776	0	0	0	0	0	0	0	20.3710141	7.265899827	27.04328151	10.15627114	0	0	0	0	0	0	0	87	20	182	41	middle
165	hsa-miR-450a-1-3p	ATTGGGAACATTTTGCATGTAT	up	inf	inf	0.061117186	0	13.87184971	0	0	0	0	0	0	10.36818775	10.77088102	30.88007426	0	31.2119552	0	0	0	0	0	0	27	46	85	0	126	middle
166	hsa-miR-134-5p_R-1	TGTGACTGGTTGACCAGAGGG	up	inf	inf	0.061174043	0	14.66273177	0	0	0	0	0	0	16.12829206	13.58067607	4.722834887	42.64517469	10.89941293	0	0	0	0	0	0	42	58	13	287	44	middle
174	hsa-miR-141-3p_R+1	TAACACTGTCTGGTAAAGATGGC	down	0.501344748	-0.996125085	0.064476009	370.0225543	185.5088643	443.1720195	566.8577987	417.5568853	155.5485837	266.9774841	254.6374083	124.80226	254.0523023	250.673544	0	228.8876715	121	221	198	23	59	208	325	1085	690	0	924	middle
175	hsa-mir-4430-p3_1ss15AG	ACCACTGCACTCCAGCCTGG	down	0.139098738	-2.845818768	0.066210456	62.45711748	8.687706198	58.60125877	64.12418537	0	135.259638	54.30050524	0	20.7363755	0	1.816474957	13.96740913	15.6059776	16	25	0	20	12	0	54	0	5	94	63	middle
176	hsa-miR-7977_1ss6AG	TTCCCGGCCAACGCACCA	up	4.779972476	2.257002311	0.066376185	2.564967415	12.26047365	0	12.82483707	0	0	0	0	16.89630597	22.94665956	5.086129879	7.578062401	21.05568406	0	5	0	0	0	0	44	98	14	51	85	middle
177	hsa-miR-9985_R-1_1ss16CT	TTCACAGTGGCTAAGTTA	up	inf	inf	0.066799087	0	1.84973179	0	0	0	0	0	0	4.864088081	2.263446011	0	3.145143545	0.8257131	0	0	0	0	0	0	12.66666667	9.666666667	0	21.16666667	3.333333333	low
179	hsa-let-7g-5p	TGAGGTAGTAGTTTGTACAGTT	up	1.742784469	0.801394162	0.067784094	4228.544771	7369.442155	3076.566086	6476.542722	5378.153771	2881.03029	3330.430988	2754.491195	10887.20515	10209.46836	5806.30165	5572.723829	8986.462744	840	2525	2550.25	426	736	2250	28351.58333	43602.33333	15982.33333	37504.16667	36277.58333	high
180	hsa-let-7c-5p	TGAGGTAGTAGGTTGTATGGTT	up	2.427185188	1.279284187	0.0694273	526.6893443	1278.372575	383.0446862	697.4573895	728.8617113	374.2183319	449.8646025	665.5666873	1816.973703	2642.510778	1095.98833	649.3607	799.8352519	104.5833333	271.9166667	345.6166667	55.33333333	99.41666667	543.6666667	4731.616667	11285.56667	3016.8	4370.166667	3228.866667	high
183	hsa-miR-143-3p_R+1	TGAGATGAAGCACTGTAGCTCT	up	3.055380038	1.611351838	0.072690612	515.2330805	1574.232869	395.5584967	351.4005358	227.7583011	737.1650272	864.2830418	852.0559431	953.8732731	2073.394596	448.3060193	1523.190543	3594.57684	108	137	108	109	191	696	2484	8855	1234	10251	14511	high
184	hsa-miR-1468-5p_R+1	CTCCGTTTGCCTGTTTCGCTGA	up	3.878190967	1.955383845	0.075272262	2.564967415	9.947433458	0	12.82483707	0	0	0	15.91483802	16.12829206	12.87822731	9.808964766	0	4.954278603	0	5	0	0	0	13	42	55	27	0	20	middle
185	hsa-miR-190a-3p	CTATATATCAAACATATTCCT	up	inf	inf	0.075789977	0	5.441398078	0	0	0	0	0	14.69061971	0	1.873196699	6.176014853	0	9.908557206	0	0	0	0	0	12	0	8	17	0	40	middle
186	hsa-miR-2276-3p_R+2	TCTGCAAGTGTCAGAGGCGAGGAT	up	inf	inf	0.076091842	0	5.085194696	0	0	0	0	0	0	6.528118214	3.278094223	0	15.00753534	5.697420393	0	0	0	0	0	0	17	14	0	101	23	middle
192	hsa-let-7a-5p	TGAGGTAGTAGGTTGTATAGTT	up	2.407112634	1.26730365	0.076706605	4138.695384	9962.305947	2355.038087	6963.15979	6146.908333	1559.994492	3668.376216	4726.849717	16646.49664	14985.53067	14986.42701	2025.130687	6403.400966	643	2714.716667	2914.783333	230.6666667	810.6833333	3861.116667	43349.46667	63999.81667	41251.4	13629.03333	25849.98333	high
193	hsa-mir-5684-p3_1ss6TC	TTGTTCTGTTGCCCAGGC	down	0.148014604	-2.756188563	0.076749029	138.9668935	20.56912977	267.3682431	87.2088921	100.171475	240.0858575	0	15.91483802	57.02503263	11.00503061	1.453179965	28.23199718	9.784700241	73	34	47.5	35.5	0	13	148.5	47	4	190	39.5	middle
195	hsa-miR-3605-5p_L+2R-4	GATGAGGATGGATAGCAAGGA	up	inf	inf	0.077610729	0	5.535201755	0	0	0	0	0	0	12.28822252	0	11.26214473	0	9.660843276	0	0	0	0	0	0	32	0	31	0	39	middle
196	hsa-miR-432-5p	TCTTGGAGTAGGTCATTGGGTGG	up	inf	inf	0.077773158	0	8.494362941	0	0	0	0	0	0	14.59226424	17.79536864	0	0	18.57854476	0	0	0	0	0	0	38	76	0	0	75	middle
197	hsa-mir-653-p5	TTGAAACAATCTCTACTGAAC	up	inf	inf	0.078068368	0	8.00745879	0	0	0	0	0	0	6.528118214	3.980542986	15.98497962	0	21.55111192	0	0	0	0	0	0	17	17	44	0	87	middle
199	hsa-miR-422a_1ss10AG	ACTGGACTTGGGGTCAGAAGGC	up	inf	inf	0.079539653	0	0.275071195	0	0	0	0	0	0	0	0.585373968	0	0.445768377	0.619284825	0	0	0	0	0	0	0	2.5	0	3	2.5	low
202	hsa-miR-200b-5p	CATCTTACTGGGCAGCATTGGA	up	2.008660343	1.00623363	0.081862427	78.35935799	157.3973349	40.28836541	166.722882	103.3347847	0	81.45075787	148.1304154	214.6598872	185.6806228	203.4451951	22.28841883	170.17947	11	65	49	0	18	121	559	793	560	150	687	middle
203	hsa-miR-5699-5p	TGCCCCAACAAGGAAGGACAAG	up	inf	inf	0.082450346	0	5.407385283	0	0	0	0	0	12.24218309	8.064146029	0	0	0	12.13798258	0	0	0	0	0	10	21	0	0	0	49	middle
205	hsa-mir-3929-p3	CCCAGCACTTTGGGAGGC	down	0.184051725	-2.441816822	0.084536579	515.8302549	94.93944833	662.9267399	261.6266763	398.5770269	1156.469905	99.55092628	121.1976126	134.4024338	14.98557359	6.902604835	209.6597264	82.48873874	181	102	189	171	22	99	350	64	19	1411	333	high
206	hsa-miR-92b-5p_L-1R+1	GGGACGGGACGCGGTGCAGTGT	up	inf	inf	0.084983602	0	3.734784838	0	0	0	0	0	9.793746472	0	1.170747937	3.269654922	0	8.174559695	0	0	0	0	0	8	0	5	9	0	33	low
207	hsa-miR-4647_R-1	GAAGATGGTGCTGTGCTGAGGA	up	inf	inf	0.085674682	0	1.917338343	0	0	0	0	0	0	4.992090399	3.043944636	0	0	3.467995022	0	0	0	0	0	0	13	13	0	0	14	low
208	hsa-miR-454-5p	ACCCTATCAATATTGTCTCTGC	up	inf	inf	0.086334482	0	1.441836096	0	0	0	0	0	0	0	3.746393398	2.179769948	0	2.724853232	0	0	0	0	0	0	0	16	6	0	11	low
209	hsa-miR-30d-3p_L-1R+1	TTTCAGTCAGATGTTTGCTGCT	up	2.721625833	1.44446874	0.086601454	11.97798726	32.59959955	0	28.21464156	0	0	31.67529473	40.3992042	2.880052153	21.07346287	55.94742866	28.97494447	46.32250494	0	11	0	0	7	33	7.5	90	154	195	187	middle
210	hsa-miR-148b-5p_L+1	GAAGTTCTGTTATACACTCAGGC	up	inf	inf	0.087158653	0	7.096795773	0	0	0	0	0	9.793746472	0	14.98557359	17.80145458	0	0	0	0	0	0	0	8	0	64	49	0	0	middle
212	hsa-miR-10527-5p	AAAGCAAATGTTGGGTGAACGGC	up	inf	inf	0.088840888	0	5.4959416	0	0	0	0	0	0	3.840069538	5.619590097	6.176014853	0	17.33997511	0	0	0	0	0	0	10	24	17	0	70	middle
216	hsa-miR-17-3p_L-1R+1	CTGCAGTGAAGGCACTTGTAGC	up	inf	inf	0.09090132	0	2.358400566	0	0	0	0	0	0	4.608083445	6.32203886	0	0	3.220281092	0	0	0	0	0	0	12	27	0	0	13	low
217	hsa-miR-874-3p_R+1	CTGCCCTGGCCCGAGGGACCGAC	up	2.168225986	1.116515131	0.091748821	61.37193544	133.0682252	73.25157346	51.29934829	134.9678821	47.34087331	0	274.2249012	77.95341161	63.2203886	144.5914065	115.3054201	123.1138233	20	20	64	7	0	224	203	270	398	776	497	middle
218	hsa-miR-378g_R+2	ACTGGGCTTGGAGTCAGAAGGC	up	inf	inf	0.092795622	0	3.014644571	0	0	0	0	0	3.672654927	0	7.726936384	0	0	6.688276114	0	0	0	0	0	3	0	33	0	0	27	low
219	hsa-miR-33a-5p_R-1	GTGCATTGTAGTTGCATTGC	up	inf	inf	0.093298354	0	2.061756895	0	0	0	0	0	0	0	2.809795049	0	3.86332593	5.697420393	0	0	0	0	0	0	0	12	0	26	23	low
220	hsa-miR-153-3p	TTGCATAGTCACAAAAGTGATC	up	inf	inf	0.093482416	0	2.069022344	0	0	0	0	0	5.508982391	4.800086922	1.287822731	0	0.817242024	0	0	0	0	0	0	4.5	12.5	5.5	0	5.5	0	low
223	hsa-miR-3065-3p_R-1	TCAGCACCAGGATATTGTTGGA	up	3.797717107	1.925132443	0.097714713	3.662578673	13.90943768	18.31289337	0	0	0	0	15.91483802	24.57644504	20.60516369	2.543064939	0	19.81711441	5	0	0	0	0	13	64	88	7	0	80	middle
224	hsa-miR-513c-5p	TTCTCAAGGAGGTGTCGTTTAT	up	inf	inf	0.098349488	0	13.55142463	0	0	0	0	0	0	0	3.746393398	18.16474957	16.79060885	42.60679599	0	0	0	0	0	0	0	16	50	113	172	middle
225	hsa-miR-27b-3p	TTCACAGTGGCTAAGTTCTGC	up	2.240164886	1.163604925	0.098626466	5869.706745	13149.11094	2994.158065	10517.64888	6496.383763	2620.655487	6719.687524	19317.55281	11568.27348	10690.72381	26845.13844	3139.942914	7333.034189	817.5	4100.5	3080.5	387.5	1485	15779.5	30125.16667	45657.66667	73893.5	21131.66667	29602.83333	high
226	hsa-miR-652-3p_R+1	AATGGCGCCACTAGGGTTGTGA	up	1.707450791	0.771844	0.099810765	76.62827621	130.8390108	124.5276749	110.2935988	75.91943369	0	72.40067366	224.0319506	109.0579749	115.9040458	119.5240521	135.5135865	81.00245516	34	43	36	0	16	183	284	495	329	912	327	middle
227	hsa-miR-32-3p_R-1	CAATTTAGTGTGTGTGATATT	up	inf	inf	0.101719431	0	2.507397952	0	0	0	0	0	0	0	6.556188447	2.543064939	0	5.945134324	0	0	0	0	0	0	0	28	7	0	24	low
228	hsa-miR-548ae-5p_R+1_1ss18TC	AAAAGTAATTGTGGTTTCTGC	up	4.46359565	2.158206342	0.102468462	0.905008421	4.03959165	0	0	0	0	4.525042104	6.529164315	0	4.464452133	4.368189777	8.875743674	0	0	0	0	0	1	5.333333333	0	19.06666667	12.02380952	59.73333333	0	low
229	hsa-miR-548ag_1ss4GA	AAAAGTAATTGTGGTTTCTGC	up	4.46359565	2.158206342	0.102468462	0.905008421	4.03959165	0	0	0	0	4.525042104	6.529164315	0	4.464452133	4.368189777	8.875743674	0	0	0	0	0	1	5.333333333	0	19.06666667	12.02380952	59.73333333	0	low
231	hsa-miR-379-3p_R-1	TATGTAACATGGTCCACTAAC	up	inf	inf	0.103041514	0	0.959261989	0	0	0	0	0	0	0	1.404897524	1.453179965	2.897494447	0	0	0	0	0	0	0	0	6	4	19.5	0	low
232	hsa-miR-500b-3p_L+2R+1	GTGCACCCAGGCAAGGATTCTGC	up	inf	inf	0.103534681	0	2.965459452	0	0	0	0	0	8.569528163	0	3.278094223	0	0	5.945134324	0	0	0	0	0	7	0	14	0	0	24	low
233	hsa-miR-190a-5p_R+1	TGATATGTTTGATATATTAGGTT	up	4.414059078	2.142105939	0.104151494	6.668915278	29.43698602	0	33.34457639	0	0	0	29.38123942	63.74515432	28.80039925	2.179769948	0	52.51535319	0	13	0	0	0	24	166	123	6	0	212	middle
235	hsa-miR-548ah-5p_R+2	AAAAGTGATTGCAGTGTTTGCC	up	inf	inf	0.104386938	0	2.924173797	0	0	0	0	0	8.569528163	0	3.278094223	0	0	5.697420393	0	0	0	0	0	7	0	14	0	0	23	low
238	hsa-mir-7851-p3_1ss4AG	GGAGGATTGCTTGAGCCT	down	0.129821907	-2.945394236	0.105154542	54.17314746	7.032861339	73.25157346	0	0	98.06323756	99.55092628	15.30272886	7.296132121	1.639047112	0	0	17.95925994	20	0	0	14.5	22	12.5	19	7	0	0	72.5	middle
239	hsa-miR-181a-5p	AACATTCAACGCTGTCGGTGAGT	down	0.540994379	-0.886314491	0.106300009	1988.906496	1075.987234	1741.556159	1538.980449	1483.592267	3012.908437	2167.495168	715.5556016	539.1457631	720.71243	596.1670808	3161.017853	723.324676	475.5	600	703.5	445.5	479	584.5	1404	3078	1641	21273.5	2920	high
242	hsa-miR-26a-1-3p	CCTATTCTTGGTTACTTGCACG	up	inf	inf	0.107542127	0	3.645486895	0	0	0	0	0	0	10.36818775	3.512243811	7.992489809	0	0	0	0	0	0	0	0	27	15	22	0	0	middle
243	hsa-miR-29b-1-5p_R-2	GCTGGTTTCATATGGTGGTTTA	up	inf	inf	0.108861545	0	3.252397271	0	0	0	0	0	0	0	10.06843226	3.996244905	0	5.449706463	0	0	0	0	0	0	0	43	11	0	22	middle
244	hsa-miR-222-3p_R+2	AGCTACATCTGGCTACTGGGTCT	up	1.315455452	0.395562393	0.109318456	536.4038453	705.615363	538.399065	474.5189717	672.7305374	385.4899684	610.880684	1034.464471	617.4831816	686.0582911	814.1440756	479.3495942	602.1925642	147	185	319	57	135	845	1608	2930	2241	3226	2431	high
245	hsa-miR-500a-3p_L+1R-1_1ss22TA	AATGCACCTGGGCAAGGATTCA	up	1.562912968	0.644237443	0.110502623	187.3006853	292.73467	153.8283043	296.2537364	262.5547082	33.8149095	190.0517684	288.9155209	244.9964365	172.7243456	446.5500935	295.6434933	307.5781299	42	115.5	124.5	5	42	236	638	737.6666667	1229.166667	1989.666667	1241.666667	middle
246	hsa-miR-502-3p	AATGCACCTGGGCAAGGATTCA	up	1.562912968	0.644237443	0.110502623	187.3006853	292.73467	153.8283043	296.2537364	262.5547082	33.8149095	190.0517684	288.9155209	244.9964365	172.7243456	446.5500935	295.6434933	307.5781299	42	115.5	124.5	5	42	236	638	737.6666667	1229.166667	1989.666667	1241.666667	middle
249	hsa-miR-137-3p	TTATTGCTTAAGAATACGCGTAG	up	inf	inf	0.111727851	0	1.950537915	0	0	0	0	0	6.121091545	2.304041723	3.278094223	0	0	0	0	0	0	0	0	5	6	14	0	0	0	low
251	hsa-miR-1908-5p	CGGCGGGGACGGCGATTGGTC	up	inf	inf	0.113678719	0	2.889670313	0	0	0	0	0	8.569528163	0	2.575645461	0	0	6.192848254	0	0	0	0	0	7	0	11	0	0	25	low
252	hsa-miR-142-5p_L+2R-3	CCCATAAAGTAGAAAGCACT	down	0.114759981	-3.123308456	0.114694019	334.7800283	38.41934981	325.9695019	815.6596379	21.08873158	40.57789141	470.6043788	8.569528163	6.528118214	14.51727442	32.69654922	163.0026363	5.201992533	89	318	10	6	104	7	17	62	90	1097	21	high
253	hsa-miR-320c_R-1	AAAAGCTGGGTTGAGAGGG	up	2.512006872	1.328840411	0.115476795	8.928979858	22.42965876	9.94128497	1.832119582	10.84563338	4.830701358	17.19515999	46.34540741	16.15572113	7.93934351	5.252207589	40.04485916	18.84041377	2.714285714	0.714285714	5.142857143	0.714285714	3.8	37.85714286	42.07142857	33.90714286	14.45714286	269.5	76.05714286	middle
254	hsa-miR-320e_L+1R+4_1ss17AG	AAAAGCTGGGTTGAGAGGGTGAA	up	inf	inf	0.115684082	0	3.043264833	0	0	0	0	0	0	0	0.995135746	1.574278296	9.559255185	6.130919771	0	0	0	0	0	0	0	4.25	4.333333333	64.33333333	24.75	low
257	hsa-miR-378c_R-5	ACTGGACTTGGAGTCAGAAG	up	2.600766667	1.378936971	0.117253487	39.78129282	103.4618603	14.65031469	70.5366039	7.381056053	0	106.3384894	185.6731102	58.9450674	53.15195634	6.176014853	146.1501152	170.6748979	4	27.5	3.5	0	23.5	151.6666667	153.5	227	17	983.5833333	689	middle
258	hsa-miR-124-3p_R-3	TAAGGCACGCGGTGAATGC	down	0.351758139	-1.507344288	0.118035356	4181.681139	1470.940377	3651.590937	3322.487791	2591.805111	7123.674269	4218.847588	21.21978402	4.352078809	8.429385146	406.769292	8126.506093	258.3656291	997	1295.333333	1229	1053.333333	932.3333333	17.33333333	11.33333333	36	1119.666667	54691	1043	high
259	hsa-miR-758-3p_1ss22CT	TTTGTGACCTGGTCCACTAACT	up	inf	inf	0.12190051	0	3.096104392	0	0	0	0	0	8.569528163	0	0	0	2.080252424	7.926845765	0	0	0	0	0	7	0	0	0	14	32	low
260	hsa-miR-130b-3p	CAGTGCAATGATGAAAGGGCAT	up	inf	inf	0.123587397	0	8.859633544	0	0	0	0	0	6.121091545	20.7363755	0	0	26.30033421	0	0	0	0	0	0	5	54	0	0	177	0	middle
263	hsa-mir-619-p5_1ss18AG	CACCTCAGCCTCCCAAAGTGC	down	0.135447661	-2.884192616	0.124716829	7276.010206	985.5185631	8753.563029	3783.326937	2752.079471	19335.36525	1755.716336	636.5935207	1085.203651	184.5098749	31.24336925	3216.813194	758.747768	2390	1475	1305	2859	388	520	2826	788	86	21649	3063	high
264	hsa-let-7f-5p	TGAGGTAGTAGATTGTATAGTT	up	1.92598565	0.945596954	0.124725906	3783.315429	7286.611227	2127.958209	7082.644522	5169.902547	1447.278127	3088.79374	4453.338943	10597.0303	8118.013025	13660.83624	2270.204235	4620.244625	581	2761.3	2451.5	214	682.6	3637.7	27595.93333	34670.2	37602.6	15278.36667	18651.53333	high
265	hsa-miR-203b-3p_1ss23AT	TTGAACTGTTAAGAACCACTGGT	up	inf	inf	0.12580806	0	3.637532678	0	0	0	0	0	12.24218309	0	5.619590097	0	0	3.963422882	0	0	0	0	0	10	0	24	0	0	16	middle
266	hsa-miR-129-2-3p	AAGCCCTTACCCCAAAAAGCAT	down	0.350379277	-1.513010644	0.126203871	201.8199451	70.71352647	164.8160403	179.547719	111.7702774	371.9640046	181.0016841	0	0	0	19.61792953	387.0755403	17.58768904	45	70	53	55	40	0	0	0	54	2605	71	middle
268	hsa-miR-378a-3p	ACTGGACTTGGAGTCAGAAGGC	up	1.943551634	0.958695436	0.128319191	2792.612365	5427.586324	1791.000971	1370.975083	1318.045724	1643.404602	7839.635445	8005.367559	4287.437639	4260.234668	2327.267714	6551.173033	7134.037331	489	534.5	625	243	1732.5	6539.166667	11165	18194.5	6406	44089.08333	28799.5	high
269	hsa-miR-7706_R-1	TGAAGCGCCTGTGCTCTGCCGAG	up	inf	inf	0.129601549	0	3.083856457	0	0	0	0	0	0	0	5.853739685	10.17225976	0	2.477139301	0	0	0	0	0	0	0	25	28	0	10	middle
270	hsa-miR-382-5p	GAAGTTGTTCGTGGTGGATTCG	up	4.520219003	2.176392672	0.130975035	2.53064779	11.43908223	0	0	12.65323895	0	0	0	8.832159937	8.897684321	5.086129879	32.68968094	13.1288383	0	0	6	0	0	0	23	38	14	220	53	middle
272	hsa-miR-182-5p_R-2	TTTGGCAATGGTAGAACTCACA	down	0.392811356	-1.348091458	0.133249292	6865.890185	2696.999632	6563.340982	5350.522027	4329.516594	11348.28363	6737.787692	484.7904504	282.629118	358.7171679	947.8366324	13539.76867	568.2557558	1792	2086	2053	1678	1489	396	736	1532	2609	91122	2294	high
273	hsa-mir-1285-2-p5_1ss16TG	TTGGGAGGCCGAGGCGGGT	down	0.136230287	-2.875880609	0.133972506	28.58683419	3.894392637	25.63805071	56.42928312	0	60.86683711	0	0	0	2.809795049	0	14.11599859	6.440562184	7	22	0	9	0	0	0	12	0	95	26	middle
275	hsa-miR-561-5p	ATCAAGGATCTTAAACTTTGCC	up	inf	inf	0.134745935	0	4.246223462	0	0	0	0	0	11.01796478	0	2.107346287	12.35202971	0	0	0	0	0	0	0	9	0	9	34	0	0	middle
277	hsa-miR-12136	GAAAAAGTCATGGAGGCC	down	0.083363135	-3.584446649	0.135860369	1795.079428	149.6434494	4486.658875	115.4235337	364.8350563	3307.09815	701.3815261	144.4577605	216.195915	129.7188714	29.06359931	125.2609138	253.1636366	1225	45	173	489	155	118	563	554	80	843	1022	high
279	hsa-miR-744-5p_R-1	TGCGGGGCTAGGGCTAACAGC	up	1.539326173	0.622298961	0.137364508	83.62642409	128.7283433	43.95094408	71.81908761	69.59281422	74.39280091	158.3764736	132.2155774	114.4340722	74.92786797	86.10091295	161.8139207	202.8777088	12	28	33	11	35	108	298	320	237	1089	819	middle
284	hsa-miR-1246_R+1	AATGGATTTTTGGAGCAGGG	up	8.02108205	3.00379687	0.141319044	12.55600147	100.712718	0	21.80222303	10.54436579	30.43341855	0	71.61677108	147.2666668	18.02951823	13.98685717	330.4629564	22.91353854	0	8.5	5	4.5	0	58.5	383.5	77	38.5	2224	92.5	middle
285	hsa-miR-195-5p_R+1	TAGCAGCACAGAAATATTGGCA	up	2.040313867	1.028791103	0.141837229	16.69645735	34.06601347	21.97547204	0	25.3064779	0	36.20033683	25.70858449	23.04041723	68.60582911	42.50551399	12.33292508	32.20281092	6	0	12	0	8	21	60	293	117	83	130	middle
286	hsa-miR-320d_R-1	AAAAGCTGGGTTGAGAGG	up	2.105239447	1.073984333	0.142815205	5.612866174	11.81642728	9.94128497	1.832119582	2.410140752	4.830701358	9.050084207	24.30947785	18.26775937	4.356854823	2.612263985	9.559255185	11.79295246	2.714285714	0.714285714	1.142857143	0.714285714	2	19.85714286	47.57142857	18.60714286	7.19047619	64.33333333	47.60714286	middle
288	hsa-miR-219a-5p_R+2	TGATTGTCCAAACGCAATTCTTG	up	inf	inf	0.142874627	0	2.369538209	0	0	0	0	0	8.569528163	3.07205563	2.575645461	0	0	0	0	0	0	0	0	7	8	11	0	0	0	low
289	hsa-miR-23a-5p	GGGGTTCCTGGGGATGGGATTT	down	0.077024313	-3.698542284	0.145021106	19.65261455	1.513729131	18.31289337	25.64967415	0	0	54.30050524	0	0	0	9.082374783	0	0	5	10	0	0	12	0	0	0	25	0	0	middle
293	hsa-miR-217-5p	TACTGCATCAGGAACTGATTGGA	up	inf	inf	0.147235517	0	15.0338266	0	0	0	0	0	55.08982391	14.9762712	20.13686452	0	0	0	0	0	0	0	0	45	39	86	0	0	0	middle
294	hsa-mir-4800-p5_1ss16CA	AGGAAGGAAGGAAGGAAA	up	inf	inf	0.147697583	0	1.662666614	0	0	0	0	0	6.121091545	0	1.873196699	0	0	1.981711441	0	0	0	0	0	5	0	8	0	0	8	low
295	hsa-miR-6877-5p_1ss22CT	AGGGCCGAAGGGTGGAAGCTGT	up	inf	inf	0.148584806	0	3.23083455	0	0	0	0	0	0	11.90421557	0	3.269654922	0	4.211136813	0	0	0	0	0	0	31	0	9	0	17	middle
296	hsa-miR-139-3p_R-1	TGGAGACGCGGCCCTGTTGGAG	up	inf	inf	0.148591168	0	7.112145408	0	0	0	0	0	0	6.14411126	9.131833908	0	0.891536753	26.50539053	0	0	0	0	0	0	16	39	0	6	107	middle
298	hsa-miR-548az-5p	CAAAAGTGATTGTGGTTTTTGC	up	inf	inf	0.150300019	0	5.724459939	0	0	0	0	0	6.529164315	0	6.556188447	21.26140687	0	0	0	0	0	0	0	5.333333333	0	28	58.52380952	0	0	middle
300	hsa-miR-191-3p_R-1	GCTGCGCTTGGATTTCGTCCC	up	inf	inf	0.152044998	0	6.584881187	0	0	0	0	0	0	0	6.32203886	0	24.51726071	8.669987555	0	0	0	0	0	0	0	27	0	165	35	middle
302	hsa-miR-629-5p_R+1	TGGGTTTACGTTGGGAGAACTT	down	0.199920998	-2.322498087	0.153598568	108.5495562	21.70133559	260.0430858	133.3783056	0	0	149.3263894	30.60545773	23.04041723	22.94665956	5.812719861	23.03136612	24.77139301	71	52	0	0	33	25	60	98	16	155	100	middle
304	hsa-mir-3159-p3_1ss16TC	CCTGTAATCCCAGCACTT	down	0.125428894	-2.995058364	0.156757912	886.7306882	111.2216497	1496.163388	432.1970094	75.91943369	2336.610247	92.76336312	45.29607743	162.6269449	57.01542453	23.97746943	260.2544371	118.1595447	408.5	168.5	36	345.5	20.5	37	423.5	243.5	66	1751.5	477	high
305	hsa-miR-206	TGGAATGTAAGGAAGTGTGTGG	up	3.686616282	1.882297263	0.157834359	12.42428126	45.80355759	0	0	16.87098526	0	45.25042104	135.8882323	51.84093876	39.57128027	13.44191468	24.66585017	9.413129346	0	0	8	0	10	111	135	169	37	166	38	middle
307	hsa-miR-379-5p	TGGTAGACTATGGAACGTAGG	up	inf	inf	0.158506629	0	10.48276586	0	0	0	0	0	0	0	12.17577854	6.539309844	40.71351172	3.467995022	0	0	0	0	0	0	0	52	18	274	14	middle
308	hsa-miR-29b-3p_L+1R-2	CTAGCACCATTTGAAATCAGTG	up	1.680824922	0.749169458	0.158895372	42.03167624	70.64788892	80.57673081	50.01686459	56.93957527	0	22.62521052	70.39255277	59.90508479	83.51335284	122.5212358	44.9483113	42.60679599	22	19.5	27	0	5	57.5	156	356.6666667	337.25	302.5	172	middle
313	hsa-miR-30a-5p_R+2	TGTAAACATCCTCGACTGGAAGCT	up	2.019568106	1.014046799	0.163447895	34535.64852	69747.09426	19199.23741	72275.65181	44520.42124	8528.120177	28154.81197	75692.19383	56626.43342	47269.29918	164599.8782	29796.04982	44498.71113	5242	28178	21111	1261	6222	61829	147462	201876.5	453075	200526	179637.5	high
314	hsa-miR-4326_R+3	TGTTCCTCTGTCTCCCAGACTCT	up	inf	inf	0.163849104	0	1.393886708	0	0	0	0	0	0	5.376097353	1.170747937	1.816474957	0	0	0	0	0	0	0	0	14	5	5	0	0	low
315	hsa-miR-486-5p	TCCTGTACTGAGCTGCCCCGAG	down	0.486063693	-1.04078272	0.164908318	209.80498	101.9785834	210.5982737	85.92640839	88.57267264	344.912077	319.0154683	105.8948837	39.16870928	67.08385679	66.48298341	316.2726631	16.96840422	57.5	33.5	42	51	70.5	86.5	102	286.5	183	2128.5	68.5	middle
316	hsa-miR-429	TAATACTGTCTGGTAAAACCGT	down	0.444269721	-1.170492276	0.166403646	963.6245916	428.1092286	765.4789427	1757.002679	1619.614585	128.4966561	547.5300945	368.489711	238.0843113	564.066356	710.2417081	111.5906836	576.1826015	209	685	768	19	121	301	620	2409	1955	751	2326	high
319	hsa-miR-628-5p	ATGCTGACATATTTACTAGAGG	up	inf	inf	0.170047625	0	5.229171808	0	0	0	0	0	0	19.58435464	0	9.808964766	0	1.981711441	0	0	0	0	0	0	51	0	27	0	8	middle
323	hsa-miR-4802-5p_R+1	TATGGAGGTTCTAGACCATGTTT	up	inf	inf	0.174688257	0	1.091291524	0	0	0	0	0	0	0	3.278094223	3.269654922	0	0	0	0	0	0	0	0	0	14	9	0	0	low
324	hsa-miR-1292-5p_L-3R+2	GAACGGGTTCCGGCAGACGCTGAA	up	inf	inf	0.174688754	0	2.044200468	0	0	0	0	0	6.121091545	6.14411126	0	0	0	0	0	0	0	0	0	5	16	0	0	0	0	low
327	hsa-miR-618	AAACTCTACTTGTCCTTCTGAGT	up	inf	inf	0.174728485	0	1.264410489	0	0	0	0	0	0	3.840069538	3.746393398	0	0	0	0	0	0	0	0	0	10	16	0	0	0	low
329	hsa-miR-493-5p	TTGTACATGGTAGGCTTTCATT	up	inf	inf	0.174771266	0	4.039523442	0	0	0	0	0	0	11.90421557	0	0	12.33292508	0	0	0	0	0	0	0	31	0	0	83	0	middle
330	hsa-mir-636-p5_1ss1AG	GGCGCGCGGGCGGGGCCGG	up	inf	inf	0.174782617	0	3.743225519	0	0	0	0	0	11.01796478	0	0	0	11.44138833	0	0	0	0	0	0	9	0	0	0	77	0	middle
331	hsa-miR-136-5p_R-1	ACTCCATTTGTTTTGATGATGG	up	inf	inf	0.174844774	0	1.692484944	0	0	0	0	0	0	0	0	0	5.200631059	4.954278603	0	0	0	0	0	0	0	0	0	35	20	low
332	hsa-miR-214-5p	TGCCTGTCTACACTTGCTGTGC	up	inf	inf	0.174849852	0	0.609378368	0	0	0	0	0	0	0	1.873196699	0	1.783073506	0	0	0	0	0	0	0	0	8	0	12	0	low
339	hsa-mir-940-p3_1ss1TA	AGAGGAAGGAAGGCAGGGC	up	inf	inf	0.175536013	0	1.575156857	0	0	0	0	0	0	4.992090399	0	0	0	4.458850743	0	0	0	0	0	0	13	0	0	0	18	low
344	hsa-miR-369-3p	AATAATACATGGTTGATCTTT	up	inf	inf	0.176996002	0	2.537269088	0	0	0	0	0	0	0	0	6.902604835	8.321009695	0	0	0	0	0	0	0	0	0	19	56	0	low
348	hsa-miR-654-3p_R-2	TATGTCTGCTGACCATCACC	up	inf	inf	0.177133417	0	1.985593121	0	0	0	0	0	0	6.528118214	5.38544051	0	0	0	0	0	0	0	0	0	17	23	0	0	0	low
349	hsa-miR-548au-5p_L-1_1ss4AG	AAGGTAATTGCGGTTTTTGC	up	inf	inf	0.177185269	0	0.249035709	0	0	0	0	0	0	0	0.819523556	0.674690698	0	0	0	0	0	0	0	0	0	3.5	1.857142857	0	0	low
350	hsa-miR-6821-5p_R-1	GTGCGTGGTGGCTCGAGGCGGG	up	inf	inf	0.177204101	0	2.683009961	0	0	0	0	0	0	8.832159937	0	7.265899827	0	0	0	0	0	0	0	0	23	0	20	0	0	low
352	hsa-miR-664b-5p_R-1	TGGGCTAAGGGAGATGATTGGGT	up	inf	inf	0.177344069	0	1.100919513	0	0	0	0	0	0	0	0	3.632949913	0	2.972567162	0	0	0	0	0	0	0	0	10	0	12	low
353	hsa-miR-4516_L+1	GGGGAGAAGGGTCGGGGC	down	0.059817077	-4.063298772	0.177441934	83.15094391	4.973846429	161.1534616	0	231.9760474	0	22.62521052	7.345309854	9.21616689	1.639047112	0	0	11.64255472	44	0	110	0	5	6	24	7	0	0	47	middle
354	hsa-miR-1228-5p_R+1	GTGGGCGGGGGCAGGTGTGTGG	up	inf	inf	0.177455963	0	0.674316721	0	0	0	0	0	0	0	0	1.816474957	0	2.229425371	0	0	0	0	0	0	0	0	5	0	9	low
355	hsa-miR-4661-5p_R-1	AACTAGCTCTGTGGATCCTGA	up	inf	inf	0.177455963	0	1.348633443	0	0	0	0	0	0	0	0	3.632949913	0	4.458850743	0	0	0	0	0	0	0	0	10	0	18	low
357	hsa-miR-616-3p_L-1R+1	GTCATTGGAGGGTTTGAGCAGA	up	inf	inf	0.177584346	0	1.622606208	0	0	0	0	0	0	5.376097353	0	4.359539896	0	0	0	0	0	0	0	0	14	0	12	0	0	low
359	hsa-miR-128-3p	TCACAGTGAACCGGTCTCTTT	down	0.707054168	-0.50010735	0.177888277	179.3139872	126.784702	144.6718576	125.6834033	119.1513334	240.0858575	266.9774841	81.41051755	148.6106911	182.753753	129.8779594	122.4377141	95.61757704	39.5	49	56.5	35.5	59	66.5	387	780.5	357.5	824	386	middle
371	hsa-miR-3177-3p	TGCACGGCACTGGGGACACGT	up	inf	inf	0.179677012	0	2.016396823	0	0	0	0	0	0	0	2.107346287	1.816474957	0	8.174559695	0	0	0	0	0	0	0	9	5	0	33	low
372	hsa-mir-5684-p5_1ss7AG	AGCCTGGGCAACAGAGTGAG	down	-inf	-inf	0.179972809	14.82065498	0	40.28836541	0	0	33.8149095	0	0	0	0	0	0	0	11	0	0	5	0	0	0	0	0	0	0	middle
373	hsa-miR-505-5p	GGGAGCCAGGAAGTATTGATGT	up	inf	inf	0.180438968	0	3.98251193	0	0	0	0	0	0	16.12829206	3.043944636	4.722834887	0	0	0	0	0	0	0	0	42	13	13	0	0	middle
380	hsa-mir-3665-p5_1ss2CA	GAGGGCGGCGGCGGCGGC	down	0.154849898	-2.691057661	0.181453752	323.3292785	50.06750583	624.4696638	19.23725561	66.42950448	831.8467738	74.66319471	170.166345	18.04832683	37.81515836	8.537432296	17.53355614	48.30421638	170.5	7.5	31.5	123	16.5	139	47	161.5	23.5	118	195	high
383	hsa-miR-3679-5p_R-2	TGAGGATATGGCAGGGAAGGG	up	inf	inf	0.181686933	0	2.752043042	0	0	0	0	0	0	6.912125168	9.600133083	0	0	0	0	0	0	0	0	0	18	41	0	0	0	low
384	hsa-mir-10396b-p5	GGGGCTCGGAGCCGGGCT	down	0.014467238	-6.111066704	0.18176014	14.2686724	0.206428275	45.78223342	0	5.272182895	20.2889457	0	0	0	0	0	0	1.238569651	12.5	0	2.5	3	0	0	0	0	0	0	5	middle
385	hsa-mir-10396a-p5	GGGGCTCGGAGCCGGGCT	down	0.014467238	-6.111066704	0.18176014	14.2686724	0.206428275	45.78223342	0	5.272182895	20.2889457	0	0	0	0	0	0	1.238569651	12.5	0	2.5	3	0	0	0	0	0	0	5	middle
386	hsa-mir-3916-p5_1ss7AG	GAGAAGGAGGAAGAAGAGGAA	up	inf	inf	0.18245448	0	30.21460677	0	0	0	0	0	0	5.376097353	6.556188447	0	120.0602827	49.2950721	0	0	0	0	0	0	14	28	0	808	199	middle
391	hsa-miR-362-3p_1ss22AT	AACACACCTATTCAAGGATTCT	up	inf	inf	0.184112219	0	2.260326001	0	0	0	0	0	0	8.064146029	0	0	5.497809977	0	0	0	0	0	0	0	21	0	0	37	0	low
394	hsa-miR-7854-3p	TGAGGTGACCGCAGATGGGAA	up	inf	inf	0.185575576	0	1.372062138	0	0	0	0	0	0	0	3.278094223	0	0	4.954278603	0	0	0	0	0	0	0	14	0	0	20	low
400	hsa-miR-3912-3p_L-1R+2	AACGCATAATATGGACATGTTA	up	inf	inf	0.186935223	0	0.796592772	0	0	0	0	0	0	0	1.873196699	2.906359931	0	0	0	0	0	0	0	0	0	8	8	0	0	low
401	hsa-miR-6816-3p_L-1R+7	AAGGACCTGCACCTTCGCCCACAG	up	inf	inf	0.186935223	0	0.995740965	0	0	0	0	0	0	0	2.341495874	3.632949913	0	0	0	0	0	0	0	0	0	10	10	0	0	low
409	hsa-miR-1287-5p	TGCTGGATCAGTGGTTCGAGTC	up	inf	inf	0.188491414	0	18.817449	0	0	0	0	0	0	10.36818775	4.214692573	0	78.75241318	19.56940048	0	0	0	0	0	0	27	18	0	530	79	middle
410	hsa-miR-939-5p_R+1	TGGGGAGCTGAGGCTCTGGGGGTGT	up	inf	inf	0.18860901	0	1.180732188	0	0	0	0	0	0	0	0	4.359539896	0	2.724853232	0	0	0	0	0	0	0	0	12	0	11	low
411	hsa-miR-136-3p	CATCATCGTCTCAAATGAGTCT	up	5.145573835	2.363331976	0.188645191	2.53064779	13.02163505	0	0	12.65323895	0	0	13.4664014	4.608083445	5.619590097	0	45.02260603	9.413129346	0	0	6	0	0	11	12	24	0	303	38	middle
413	hsa-mir-1268b-p3	GGTGCCTGTAATTCCAGC	down	0.012434814	-6.329471272	0.188909064	39.84200036	0.49542786	84.23930948	0	0	114.9706923	0	0	0	0	0	0	2.972567162	23	0	0	17	0	0	0	0	0	0	12	middle
414	hsa-miR-4510_1ss13AT	TGAGGGAGTAGGTTGTATGGTT	up	inf	inf	0.189526443	0	0.252101463	0	0	0	0	0	0	0.576010431	0.93659835	0	0	0	0	0	0	0	0	0	1.5	4	0	0	0	low
417	hsa-miR-556-5p_R-1	GATGAGCTCATTGTAATATGA	up	inf	inf	0.190134274	0	3.214144473	0	0	0	0	0	0	7.296132121	0	11.98873471	0	0	0	0	0	0	0	0	19	0	33	0	0	middle
418	hsa-miR-212-5p	ACCTTGGCTCTAGACTGCTTACT	up	inf	inf	0.190175698	0	3.01238255	0	0	0	0	0	0	0	11.23918019	0	6.835115106	0	0	0	0	0	0	0	0	48	0	46	0	middle
421	hsa-mir-5100-p3_1ss17TC	ATCCCAGCGGTGCCTCCA	up	inf	inf	0.190258523	0	5.579192141	0	0	0	0	0	0	23.42442418	6.087889272	0	2.228841883	1.733997511	0	0	0	0	0	0	61	26	0	15	7	middle
423	hsa-miR-424-5p_R-1	CAGCAGCAATTCATGTTTTGA	up	2.035952982	1.025704245	0.190828122	162.2326052	330.2979564	21.97547204	423.2196234	194.0163305	0	171.9515999	243.6194435	296.0693614	392.9030076	730.9495226	62.85334109	255.393062	6	165	92	0	38	199	771	1678	2012	423	1031	middle
425	hsa-miR-216a-5p	TAATCTCAGCTGGCAACTGTGA	up	inf	inf	0.191253071	0	2.375352844	0	0	0	0	0	9.793746472	0	0	3.269654922	1.188715671	0	0	0	0	0	0	8	0	0	9	8	0	low
427	hsa-miR-1277-5p_L-3R+2	TATATATATATATGTACGTATGT	up	inf	inf	0.191480522	0	1.255438323	0	0	0	0	0	0	0	2.809795049	4.722834887	0	0	0	0	0	0	0	0	0	12	13	0	0	low
428	hsa-miR-5010-3p_R+1	TTTTGTGTCTCCCATTCCCCAGT	up	inf	inf	0.191625468	0	1.625673576	0	0	0	0	0	6.121091545	0	0	3.632949913	0	0	0	0	0	0	0	5	0	0	10	0	0	low
431	hsa-miR-1299	TTCTGGAATTCTGTGTGAGGGA	up	inf	inf	0.191983613	0	15.51108392	0	0	0	0	0	20.81171125	8.064146029	0	0	64.19064622	0	0	0	0	0	0	17	21	0	0	432	0	middle
433	hsa-miR-186-5p	CAAAGAATTCTCCTTTTGGGCT	up	1.56261838	0.643965489	0.192779617	564.0183193	881.3453923	282.0185578	864.3940188	586.2667379	236.7043665	850.7079155	1355.209668	502.2810955	659.5993877	1493.142414	823.0370125	454.8027758	77	337	278	35	188	1107	1308	2817	4110	5539	1836	high
437	hsa-miR-129-5p	CTTTTTGCGGTCTGGGCTTGC	down	0.411468726	-1.281145314	0.194519275	102.9120558	42.34509249	120.8650962	65.40666908	50.61295579	169.0745475	108.6010105	4.284764082	1.920034769	1.756121905	12.35202971	227.5647562	6.192848254	33	25.5	24	25	24	3.5	5	7.5	34	1531.5	25	middle
438	hsa-miR-4776-5p_L+1R-1	AGTGGACCAGGATGGCAAGGGC	down	-inf	-inf	0.195127642	11.08277208	0	38.45707607	6.412418537	10.54436579	0	0	0	0	0	0	0	0	10.5	2.5	5	0	0	0	0	0	0	0	0	middle
440	hsa-miR-10399-5p_R+2	AATTACAGATTGTCTCAGAGAAA	up	inf	inf	0.195405822	0	1.197288151	0	0	0	0	0	0	4.608083445	2.575645461	0	0	0	0	0	0	0	0	0	12	11	0	0	0	low
441	hsa-miR-502-5p_L+1R+2	AATCCTTGCTATCTGGGTGCTAGT	up	inf	inf	0.196174797	0	1.315987488	0	0	0	0	0	0	0	2.809795049	5.086129879	0	0	0	0	0	0	0	0	0	12	14	0	0	low
443	hsa-miR-660-3p_R-1	ACCTCCTGTGTGCATGGATT	up	inf	inf	0.196453836	0	1.512336796	0	0	0	0	0	0	0	5.853739685	0	0	3.220281092	0	0	0	0	0	0	0	25	0	0	13	low
446	hsa-miR-6757-5p_R+3	TAGGGATGGGAGGCCAGGATGAAGT	up	inf	inf	0.197239338	0	4.724575906	0	0	0	0	0	18.36327464	9.984180798	0	0	0	0	0	0	0	0	0	15	26	0	0	0	0	middle
453	hsa-let-7e-3p	CTATACGGCCTCCTAGCTTTCC	up	inf	inf	0.198806193	0	4.857673543	0	0	0	0	0	0	0	3.980542986	20.70781451	4.457683765	0	0	0	0	0	0	0	0	17	57	30	0	middle
454	hsa-mir-8072-p3_1ss18TG	CCGCCGCCACCGCCGCCGCCGC	up	inf	inf	0.199115518	0	0.596677587	0	0	0	0	0	0	0	2.341495874	0	0	1.238569651	0	0	0	0	0	0	0	10	0	0	5	low
455	hsa-miR-2116-3p_L+1R-1	TCCTCCCATGCCAAGAACTCC	up	inf	inf	0.199564705	0	4.666143531	0	0	0	0	0	0	19.58435464	1.873196699	6.539309844	0	0	0	0	0	0	0	0	51	8	18	0	0	middle
457	hsa-mir-8086-p3_1ss14AG	CCCAGGCTGGAGTGCAGTGG	down	0.331941206	-1.591000362	0.19966826	3230.182376	1072.230634	4730.220356	2300.775771	574.6679356	7861.96646	683.2813577	326.2541794	2044.645025	312.1214	104.6289575	2916.216719	729.5175243	1291.5	897	272.5	1162.5	151	266.5	5324.5	1333	288	19626	2945	high
460	hsa-miR-577_L+1	GTAGATAAAATATTGGTACCTG	up	6.00410484	2.585949169	0.200557155	3.077960898	18.48039992	0	15.38980449	0	0	0	14.69061971	15.7442851	2.107346287	67.93616338	0	10.40398507	0	6	0	0	0	12	41	9	187	0	42	middle
461	hsa-miR-873-3p_L-1R+1	GAGACTGATGAGTTCCCGGGAT	up	inf	inf	0.200847447	0	2.13461548	0	0	0	0	0	0	8.448152983	0	4.359539896	0	0	0	0	0	0	0	0	22	0	12	0	0	low
471	hsa-miR-548ab_R-1	AAAAGTAATTGTGGATTTTGC	up	inf	inf	0.204559111	0	0.92888423	0	0	0	0	0	0	0	0.390249312	1.219633185	0	3.963422882	0	0	0	0	0	0	0	1.666666667	3.357142857	0	16	low
472	hsa-miR-378a-5p	CTCCTGACTCCAGGTCCTGTGT	up	2.206528685	1.141778503	0.204612866	9.803775402	21.63231165	0	38.47451122	10.54436579	0	0	7.345309854	20.7363755	24.35155709	33.4231392	26.59751313	17.33997511	0	15	5	0	0	6	54	104	92	179	70	middle
473	hsa-miR-141-5p	CATCTTCCAGTACAGTGTTGGA	up	inf	inf	0.2049206	0	1.428316559	0	0	0	0	0	0	5.760104306	2.809795049	0	0	0	0	0	0	0	0	0	15	12	0	0	0	low
477	hsa-miR-6500-3p	ACACTTGTTGGGATGACCTGC	up	inf	inf	0.205595072	0	1.796357273	0	0	0	0	0	0	0	3.512243811	7.265899827	0	0	0	0	0	0	0	0	0	15	20	0	0	low
478	hsa-mir-1285-1-p5_1ss12AG	AGGCTGGTCTCGAACTCC	down	0.152565655	-2.712497866	0.205937474	2212.723121	337.5855533	2259.811041	828.484475	520.89167	7006.449249	447.9791683	334.2115984	653.9638423	229.9348948	66.8462784	412.3357483	328.2209574	617	323	247	1036	99	273	1703	982	184	2775	1325	high
482	hsa-miR-1269b_L-1R-3	TGGACTGAGCCATGCTAC	up	inf	inf	0.207360799	0	0.90110874	0	0	0	0	0	3.672654927	0	0	0	0	1.733997511	0	0	0	0	0	3	0	0	0	0	7	low
484	hsa-miR-3200-3p_R+1	CACCTTGCGCTACTCAGGTCTGC	up	inf	inf	0.208235869	0	2.575449347	0	0	0	0	0	0	0	4.917141335	10.53555475	0	0	0	0	0	0	0	0	0	21	29	0	0	middle
486	hsa-miR-132-5p	ACCGTGGCTTTCGATTGTTACT	up	2.947180159	1.559335254	0.209482552	2.108873158	6.215229129	0	0	10.54436579	0	0	7.345309854	0	2.107346287	5.44942487	15.45330372	6.935990044	0	0	5	0	0	6	0	9	15	104	28	middle
487	hsa-miR-3664-3p_R+1	TCTCAGGAGTAAAGACAGAGTTT	up	inf	inf	0.209504783	0	1.488481099	0	0	0	0	0	6.121091545	0	2.809795049	0	0	0	0	0	0	0	0	5	0	12	0	0	0	low
488	hsa-miR-143-5p_R+1	GGTGCAGTGCTGCATCTCTGGTC	up	2.683464439	1.42409677	0.210650428	7.694902244	20.64899654	0	38.47451122	0	0	0	23.26014787	16.51229901	20.3710141	0	42.19940631	21.55111192	0	15	0	0	0	19	43	87	0	284	87	middle
490	hsa-miR-192-3p_R+1	CTGCCAATTCCATAGGTCACAGA	up	inf	inf	0.211881044	0	1.474324129	0	0	0	0	0	6.121091545	0	0	0	0	2.724853232	0	0	0	0	0	5	0	0	0	0	11	low
491	hsa-miR-30e-3p_1ss22CT	CTTTCAGTCGGATGTTTACAGT	up	1.514997104	0.599315036	0.211917656	411.2449709	623.0349398	256.3805071	713.0609413	634.7708206	135.259638	316.7529473	463.9787391	744.7814868	685.5899919	978.7167066	182.319266	682.8234485	70	278	301	20	70	379	1939.5	2928	2694	1227	2756.5	high
493	hsa-miR-4716-3p_L-1R+2	AGGGGGAAGGAAACATGGAGACA	down	-inf	-inf	0.212454115	7.995017939	0	0	12.82483707	0	0	27.15025262	0	0	0	0	0	0	0	5	0	0	6	0	0	0	0	0	0	middle
494	hsa-miR-296-3p_R+1	GAGGGTTGGGTGGAGGCTCTCCA	up	3.986391341	1.995083345	0.212772088	6.335058945	25.25402412	0	0	0	0	31.67529473	56.31404221	0	8.429385146	0	69.68845619	17.09226118	0	0	0	0	7	46	0	36	0	469	69	middle
496	hsa-miR-411-5p	TAGTAGACCGTATAGCGTACG	up	inf	inf	0.214801029	0	5.364429743	0	0	0	0	0	0	0	4.44884216	0	23.77431341	3.963422882	0	0	0	0	0	0	0	19	0	160	16	middle
499	hsa-miR-4492_R+1	GGGGCTGGGCGCGCGCCG	down	0.018784466	-5.73431611	0.215819434	170.6415901	3.205411093	95.2270455	17.9547719	90.6815458	622.1943349	27.15025262	7.345309854	0	0	0	11.88715671	0	26	7	43	92	6	6	0	0	0	80	0	middle
508	hsa-miR-301a-5p_R-1	GCTCTGACTTTATTGCACTAC	up	inf	inf	0.218903046	0	5.855881474	0	0	0	0	0	0	0	0	10.17225976	24.96302908	0	0	0	0	0	0	0	0	0	28	168	0	middle
511	hsa-miR-484	TCAGGCTCAGTCCCCTCCCGAT	up	1.460993113	0.546949377	0.219576056	179.3623348	262.0471358	194.1166697	277.0164808	177.1453453	94.68174661	153.8514315	85.69528163	198.1475881	291.5162363	253.216609	490.0480352	253.6590645	53	108	84	14	34	70	516	1245	697	3298	1024	middle
513	hsa-miR-195-3p	CCAATATTGGCTGTGCTGCTCC	up	inf	inf	0.219834316	0	1.359035956	0	0	0	0	0	0	0	2.341495874	5.812719861	0	0	0	0	0	0	0	0	0	10	16	0	0	low
514	hsa-miR-222-5p_R-1	CTCAGTAGCCAGTGTAGATCC	up	inf	inf	0.219834316	0	0.679517978	0	0	0	0	0	0	0	1.170747937	2.906359931	0	0	0	0	0	0	0	0	0	5	8	0	0	low
520	hsa-miR-509-5p_R+1	TACTGCAGACAGTGGCAATCAT	up	inf	inf	0.220926968	0	5.537210375	0	0	0	0	0	0	0	4.331767367	3.996244905	0	24.89524998	0	0	0	0	0	0	0	18.5	11	0	100.5	middle
523	hsa-miR-375-3p	TTTGTTCGTTCGGCTCGCGTGA	up	16.9880735	4.08645035	0.222750935	66.58168572	1131.094571	21.97547204	69.2541202	31.63309737	101.4447285	108.6010105	40.3992042	1896.994352	4647.86931	20.70781451	138.4853756	42.11136813	6	27	15	15	24	33	4940	19850	57	932	170	high
524	hsa-miR-1275_R+1	GTGGGGGAGAGGCTGTCG	up	inf	inf	0.222876715	0	0.977187267	0	0	0	0	0	0	4.224076491	1.639047112	0	0	0	0	0	0	0	0	0	11	7	0	0	0	low
529	hsa-miR-641	AAAGACATAGGATAGAGTCACCTC	up	inf	inf	0.225629814	0	4.291126572	0	0	0	0	0	0	0	7.024487622	0	18.72227181	0	0	0	0	0	0	0	0	30	0	126	0	middle
533	hsa-miR-146b-3p_L+1	TGCCCTGTGGACTCAGTTCTGGT	up	inf	inf	0.226553623	0	10.13506902	0	0	0	0	0	0	0	10.53673143	4.359539896	45.91414278	0	0	0	0	0	0	0	0	45	12	309	0	middle
534	hsa-miR-3064-5p_R+1	TCTGGCTGTTGTGGTGTGCAAA	up	inf	inf	0.226802648	0	1.300794447	0	0	0	0	0	0	0	2.107346287	0	0	5.697420393	0	0	0	0	0	0	0	9	0	0	23	low
535	hsa-miR-3960_R-2_1ss12AC	GGCGGCGGCGGCGGCGGG	down	0.2390469	-2.064634399	0.22881166	1713.762601	409.6696371	5242.981371	242.3894207	1219.983122	1481.093036	382.3660578	1241.357365	173.5711431	304.9798376	85.19267547	407.4322961	245.4845048	1431.5	94.5	578.5	219	84.5	1014	452	1302.5	234.5	2742	991	high
537	hsa-mir-3648-1-p5	GGGGGAGCCGCGGGGATCGC	down	0.251894177	-1.989110321	0.229059087	6974.770741	1756.904138	16126.3339	433.4794931	1408.72727	15629.25117	1276.061873	3403.326899	120.5781835	1417.073303	100.2694176	51.70913167	5448.467894	4403	169	668	2311	282	2780	314	6052	276	348	21995	high
539	hsa-miR-651-5p_R-1	TTTAGGATAAGCTTGACTTTT	up	inf	inf	0.22962023	0	2.519457441	0	0	0	0	0	0	11.13620166	3.980542986	0	0	0	0	0	0	0	0	0	29	17	0	0	0	middle
540	hsa-miR-6863_R+1	TAGACGTGGTGAAGGATTGAGTGA	up	inf	inf	0.229928608	0	2.766953831	0	0	0	0	0	12.24218309	0	0	4.359539896	0	0	0	0	0	0	0	10	0	0	12	0	0	middle
541	hsa-miR-769-3p	CTGGGATCTCCGGGGTCTTGGTT	up	inf	inf	0.230138061	0	1.9355788	0	0	0	0	0	8.569528163	0	3.043944636	0	0	0	0	0	0	0	0	7	0	13	0	0	0	low
542	hsa-miR-3144-3p_L+1R-2_1ss4AG	TATGTACCTGTTCGGTCTCTT	up	inf	inf	0.230310138	0	0.894720068	0	0	0	0	0	0	0	1.404897524	0	0	3.963422882	0	0	0	0	0	0	0	6	0	0	16	low
543	hsa-miR-4662b	AAAGATGGACAATTGGCTAAAT	up	inf	inf	0.231150107	0	11.07697913	0	0	0	0	0	0	5.760104306	7.258637209	2.179769948	51.2633633	0	0	0	0	0	0	0	15	31	6	345	0	middle
546	hsa-mir-4512-p3_1ss6GC	TCACTCTATCGCCCAGGC	up	inf	inf	0.231314269	0	3.310274558	0	0	0	0	0	0	0	5.151290923	0	14.71035642	0	0	0	0	0	0	0	0	22	0	99	0	middle
547	hsa-miR-330-5p_R-1	TCTCTGGGCCTGTGTCTTAGG	up	inf	inf	0.23136721	0	4.164866559	0	0	0	0	0	0	0	3.278094223	2.543064939	19.16804019	0	0	0	0	0	0	0	0	14	7	129	0	middle
548	hsa-mir-5689-p5_1ss14AC	CCTGTAGTCCTAGCTACT	up	inf	inf	0.231728207	0	1.812323513	0	0	0	0	0	0	8.064146029	2.809795049	0	0	0	0	0	0	0	0	0	21	12	0	0	0	low
554	hsa-miR-489-3p_R-1	GTGACATCACATATACGGCAG	up	3.04401947	1.605977587	0.23303465	2.564967415	7.807810751	0	12.82483707	0	0	0	0	19.9683616	8.663534733	5.086129879	0	13.1288383	0	5	0	0	0	0	52	37	14	0	53	middle
555	hsa-miR-1277-3p_R-1	TACGTAGATATATATGTATTT	up	inf	inf	0.233457136	0	1.38056019	0	0	0	0	0	0	0	2.107346287	6.176014853	0	0	0	0	0	0	0	0	0	9	17	0	0	low
556	hsa-miR-625-5p_R-1	AGGGGGAAAGTTCTATAGTC	down	0.137980582	-2.857462846	0.233517479	21.80850706	3.009150492	54.9386801	0	0	54.10385521	0	12.24218309	0	0	5.812719861	0	0	15	0	0	8	0	10	0	0	16	0	0	middle
557	hsa-miR-4636	AACTCGTGTTCAAAGCCTTTAG	up	inf	inf	0.23374547	0	2.460726363	0	0	0	0	0	11.01796478	0	3.746393398	0	0	0	0	0	0	0	0	9	0	16	0	0	0	middle
558	hsa-miR-181b-5p	AACATTCATTGCTGTCGGTGGGT	down	0.636749627	-0.651201885	0.23375994	464.6625023	295.8736752	445.0033088	368.072824	322.6575932	689.8241539	497.7546314	240.5588977	149.378705	172.3340963	153.1288388	861.2987981	198.542715	121.5	143.5	153	102	110	196.5	389	736	421.5	5796.5	801.5	high
560	hsa-miR-33b-3p_R-1	CAGTGCCTCGGCAGTGCAGCC	up	inf	inf	0.236318293	0	3.148541506	0	0	0	0	0	0	14.20825729	4.682991748	0	0	0	0	0	0	0	0	0	37	20	0	0	0	middle
561	hsa-miR-196a-3p_L+1R+1_1ss18CT	TCGGCAACAAGAAACTGTCTGAGT	up	inf	inf	0.236330036	0	4.342244464	0	0	0	0	0	0	0	2.575645461	3.269654922	20.2081664	0	0	0	0	0	0	0	0	11	9	136	0	middle
564	hsa-miR-3620-5p_R-1	GTGGGCTGGGCTGGGCTGGGC	up	inf	inf	0.236434173	0	2.334121076	0	0	0	0	0	0	0	10.53673143	0	0	3.467995022	0	0	0	0	0	0	0	45	0	0	14	middle
570	hsa-miR-766-3p	ACTCCAGCCCCACAGCCTCAGC	up	inf	inf	0.238175444	0	0.800616308	0	0	0	0	0	0	0	1.170747937	3.632949913	0	0	0	0	0	0	0	0	0	5	10	0	0	low
573	hsa-miR-887-3p_R+3	GTGAACGGGCGCCATCCCGAGGCTT	up	3.015290753	1.592297122	0.240676017	2.53064779	7.630638878	0	0	12.65323895	0	0	18.36327464	0	5.853739685	15.62168463	0	5.945134324	0	0	6	0	0	15	0	25	43	0	24	middle
581	hsa-miR-26a-5p	TTCAAGTAATCCAGGATAGGCT	up	1.502091325	0.586972529	0.243597724	10194.52377	15313.10572	6225.773315	14956.75249	12390.33276	6060.758947	11339.00134	16951.75093	15088.59323	14435.55621	31042.28548	4852.485957	9507.962495	1699.833333	5831.166667	5875.333333	896.1666667	2505.833333	13847	39292.5	61651	85446.5	32657	38382.83333	high
583	hsa-miR-4498_R+1	TGGGCTGGCAGGGCAAGTGCTGC	up	inf	inf	0.243839939	0	1.181411997	0	0	0	0	0	0	0	1.639047112	5.44942487	0	0	0	0	0	0	0	0	0	7	15	0	0	low
584	hsa-mir-663a-p3	TGGCGGTGGGATCCCGCGGC	down	0.024135138	-5.372721112	0.244124534	16.97780959	0.409761778	62.26383745	0	0	0	22.62521052	0	0	2.458570668	0	0	0	17	0	0	0	5	0	0	10.5	0	0	0	middle
589	hsa-miR-3127-5p_R-1	ATCAGGGCTTGTGGAATGGGAA	up	inf	inf	0.247683104	0	1.57544269	0	0	0	0	0	7.345309854	0	2.107346287	0	0	0	0	0	0	0	0	6	0	9	0	0	0	low
591	hsa-mir-3648-1-p3	AGGGGTCCCCGTGGCGTCCC	down	0.202033647	-2.307332515	0.248836702	78.71903482	15.90389367	205.1044057	0	12.65323895	175.8375294	0	12.24218309	0	5.151290923	0	0	78.029888	56	0	6	26	0	10	0	22	0	0	315	middle
598	hsa-mir-3929-p5_1ss3AT	CCTGTAATCCCAGCACTTTGGGAGGC	down	0.372077941	-1.426323235	0.251726365	264.8702806	98.55238853	302.1627405	622.0045981	0	388.8714593	11.31260526	26.9328028	138.4345068	22.12713601	1.453179965	359.5121957	42.85450992	82.5	242.5	0	57.5	2.5	22	360.5	94.5	4	2419.5	173	middle
599	hsa-miR-9901	CGGTCGCCGCGGTTCGCCGCC	down	0.102032568	-3.29289837	0.251827941	42.32232294	4.318255301	69.58899479	0	0	142.0226199	0	19.58749294	0	6.32203886	0	0	0	19	0	0	21	0	16	0	27	0	0	0	middle
601	hsa-mir-1303-p3_1ss1GA	AGGTCTTGCTCTGTTGCC	down	0.201859053	-2.308579808	0.252706583	187.0804736	37.76388714	230.7424564	12.82483707	23.19760474	605.2868801	63.35058945	22.64803872	83.71351592	28.80039925	9.808964766	35.66147012	45.95093404	63	5	11	89.5	14	18.5	218	123	27	240	185.5	middle
602	hsa-miR-24-2-5p_L+1R-1	GTGCCTACTGAGCTGAAACACA	up	2.813275594	1.492250889	0.255472601	7.181908761	20.20468864	0	35.90954381	0	0	0	0	6.528118214	18.96611658	20.34451951	56.3154049	19.07397262	0	14	0	0	0	0	17	81	56	379	77	middle
603	hsa-miR-891a-5p_R-1	TGCAACGAACCTGAGCCACTG	up	3.089781586	1.627504859	0.255603518	3.374197053	10.42553192	0	0	16.87098526	0	0	0	20.35236855	10.30258185	0	27.93481826	3.963422882	0	0	8	0	0	0	53	44	0	188	16	middle
604	hsa-miR-4755-3p_R-4	AGCCAGGCTCTGAAGGGA	down	0.09557525	-3.387219125	0.255716175	11.77815695	1.125700292	18.31289337	0	0	40.57789141	0	0	0	0	2.543064939	0	4.211136813	5	0	0	6	0	0	0	0	7	0	17	middle
608	hsa-miR-2277-5p_R-1	AGCGCGGGCTGAGCGCTGCCAGT	up	inf	inf	0.257370158	0	1.926277127	0	0	0	0	0	0	9.21616689	2.341495874	0	0	0	0	0	0	0	0	0	24	10	0	0	0	low
615	hsa-miR-4449_L-2R+1	TCCCGGGGCTGCGCGAGGCAT	up	inf	inf	0.259498107	0	3.346991408	0	0	0	0	0	0	0	3.980542986	0	0	16.10140546	0	0	0	0	0	0	0	17	0	0	65	middle
616	hsa-mir-1827-p3_1ss15TG	AAAGGCTGAGGCAGGAGA	down	-inf	-inf	0.259700403	17.18854248	0	18.31289337	0	0	67.62981901	0	0	0	0	0	0	0	5	0	0	10	0	0	0	0	0	0	0	middle
617	hsa-mir-3135a-p3_1ss13CA	CTGCAGCCTTGAACTCCTGGGCTC	down	0.101574636	-3.299387901	0.259935011	23.41306532	2.378173587	0	35.90954381	0	81.15578281	0	3.060545773	0	7.492786797	0	0	3.715708952	0	14	0	12	0	2.5	0	32	0	0	15	middle
621	hsa-miR-374a-5p_R-1	TTATAATACAACCTGATAAGT	down	0.444667828	-1.169200067	0.26317082	242.8177641	107.9732478	84.23930948	630.981984	227.7583011	108.2077104	162.9015157	113.8523027	77.18539771	75.63031673	296.8120079	45.4683744	38.89108703	23	246	108	16	36	93	201	323	817	306	157	middle
629	hsa-miR-328-3p	CTGGCCCTCTCTGCCCTTCCGT	down	0.527151121	-0.92371149	0.266515687	60.33021017	31.80313791	29.30062939	35.90954381	40.06859	128.4966561	67.87563155	15.91483802	11.52020861	21.30761245	11.26214473	108.7674839	22.04653978	8	14	19	19	15	13	30	91	31	732	89	middle
631	hsa-miR-7704_R-1	CGGGGTCGGCGGCGACGT	down	0.238248856	-2.069458805	0.267298785	92.69473897	22.08441556	234.4050351	0	12.65323895	216.4154208	0	80.7984084	9.21616689	12.17577854	0	15.45330372	14.86283581	64	0	6	32	0	66	24	52	0	104	60	middle
632	hsa-mir-3196-p5_1ss4GT	GGGTCGGGGCGGCAGGGGC	up	inf	inf	0.26747479	0	1.99558607	0	0	0	0	0	9.793746472	0	0	2.179769948	0	0	0	0	0	0	0	8	0	0	6	0	0	low
633	hsa-miR-1285-3p_R-3	TCTGGGCAACAAAGTGAGA	down	0.02892953	-5.111313314	0.267555195	30.44735999	0.880827809	16.48160403	7.694902244	6.326619474	121.7336742	0	3.060545773	0	2.22442108	0	0	0	4.5	3	3	18	0	2.5	0	9.5	0	0	0	middle
634	hsa-miR-21-3p	CAACACCAGTCGATGGGCTGT	down	0.421182977	-1.247480966	0.268576032	54.03639897	22.7592114	0	94.90379434	14.76211211	33.8149095	126.7011789	18.36327464	29.18452849	25.05400585	13.07861969	21.39688207	29.47795769	0	37	7	5	28	15	76	107	36	144	119	middle
635	hsa-mir-1273c-p3_1ss21AG	GAGTCTCGTTCTGTTGCCCAGGC	down	0.257902988	-1.955099607	0.269186343	53.67095203	13.8418989	49.44481209	35.90954381	10.54436579	172.4560385	0	14.69061971	25.34445895	13.34652648	0	24.22008179	5.449706463	13.5	14	5	25.5	0	12	66	57	0	163	22	middle
636	hsa-miR-10400-5p_R-3_1ss12GA	CGGCGGCGGCGACTCTGG	down	0.399784978	-1.32270383	0.269237632	193.5097038	77.36227275	483.4603849	76.94902244	312.1132274	0	95.02588418	161.5968168	80.25745334	90.85003991	13.80520967	0	117.6641168	132	30	148	0	21	132	209	388	38	0	475	middle
637	hsa-mir-1273h-p5_1ss3CG	GGGAGGATTGCTTGAGCC	down	0.118687661	-3.074758138	0.269349249	318.626317	37.81701227	406.5462327	15.38980449	31.63309737	1139.56245	0	123.0339401	0	25.05400585	3.632949913	0	75.1811778	111	6	15	168.5	0	100.5	0	107	10	0	303.5	high
639	hsa-miR-6859-5p_1ss22CA	GAGAGGAACATGGGCTCAGGAAA	up	inf	inf	0.270488555	0	6.191456394	0	0	0	0	0	0	0	0	6.539309844	30.60942852	0	0	0	0	0	0	0	0	0	18	206	0	middle
643	hsa-miR-411-3p_R-1	TATGTAACACGGTCCACTAAC	up	inf	inf	0.271625244	0	1.393764967	0	0	0	0	0	0	0	0	1.453179965	6.909409836	0	0	0	0	0	0	0	0	0	4	46.5	0	low
649	hsa-miR-7-5p	TGGAAGACTAGTGATTTTGTTGTT	down	0.614349532	-0.70286839	0.273203308	83.39113803	51.23130661	61.04297789	80.36897899	62.56323702	123.9880015	88.99249471	24.89243895	25.21645663	34.96633838	20.22342118	173.3543686	28.7348159	16.66666667	31.33333333	29.66666667	18.33333333	19.66666667	20.33333333	65.66666667	149.3333333	55.66666667	1166.666667	116	middle
651	hsa-miR-483-5p_L-1R+1	AGACGGGAGGAAAGAAGGGAGT	up	inf	inf	0.274833805	0	14.26239771	0	0	0	0	0	0	0	0	3.996244905	71.91729808	9.660843276	0	0	0	0	0	0	0	0	11	484	39	middle
653	hsa-miR-486-3p	CGGGGCAGCTCAGTACAGGAT	down	0.105057649	-3.250746892	0.275330192	14.67926729	1.542169308	53.10739076	0	0	20.2889457	0	0	7.296132121	0	1.089884974	0	0.866998756	14.5	0	0	3	0	0	19	0	3	0	3.5	middle
654	hsa-miR-6124_L-2_1ss14GA	GAAAAGGAAGGAGGAGGA	up	inf	inf	0.275487617	0	2.583821397	0	0	0	0	0	0	0	2.575645461	0	12.92728292	0	0	0	0	0	0	0	0	11	0	87	0	middle
656	hsa-miR-3074-3p_R+1	GATATCAGCTCAGTAGGCACCGT	up	inf	inf	0.275816907	0	0.748223449	0	0	0	0	0	0	0	3.746393398	0	0.742947294	0	0	0	0	0	0	0	0	16	0	5	0	low
658	hsa-miR-16-2-3p_L+1R-1	ACCAATATTACTGTGCTGCTTT	up	1.97265275	0.980137018	0.276459357	9.021004905	17.79531014	0	17.9547719	0	0	27.15025262	9.793746472	20.7363755	25.9906042	34.14972919	0	16.10140546	0	7	0	0	6	8	54	111	94	0	65	middle
663	hsa-miR-625-3p	GACTATAGAACTTTCCCCCTCA	down	0.14649585	-2.771068304	0.277762505	17.22890063	2.523962435	0	58.99425054	0	0	27.15025262	0	7.296132121	4.214692573	3.632949913	0	0	0	23	0	0	6	0	19	18	10	0	0	middle
664	hsa-miR-676-3p_R+1	CTGTCCTAAGGTTGTTGAGTTG	up	inf	inf	0.278333138	0	2.916735793	0	0	0	0	0	14.69061971	0	2.809795049	0	0	0	0	0	0	0	0	12	0	12	0	0	0	middle
665	hsa-miR-338-3p_R-1	TCCAGCATCAGTGATTTTGTT	up	inf	inf	0.280291535	0	6.22133979	0	0	0	0	0	31.82967603	0	2.575645461	2.179769948	0.742947294	0	0	0	0	0	0	26	0	11	6	5	0	middle
668	hsa-miR-1-3p	TGGAATGTAAAGAAGTATGTAT	up	2.964873615	1.567970608	0.281251336	208.2245718	617.359539	184.960223	169.2878494	92.79041896	263.7562941	330.3280736	2257.458562	450.0561498	535.8513307	43.77704646	330.6858406	86.32830466	50.5	66	44	39	73	1844	1172	2288.5	120.5	2225.5	348.5	high
669	hsa-miR-34b-3p_L-2R+1	ATCACTAACTCCACTGCCATC	up	inf	inf	0.281959698	0	2.258930368	0	0	0	0	0	0	0	11.47332978	0	2.080252424	0	0	0	0	0	0	0	0	49	0	14	0	middle
675	hsa-miR-548av-5p_R+4	AAAAGTACTTGCGGATTTTGCT	down	0.414692489	-1.269886177	0.28393866	11.24921231	4.664963857	25.63805071	17.9547719	12.65323895	0	0	0	0	5.151290923	14.16850466	0	8.669987555	7	7	6	0	0	0	0	22	39	0	35	middle
676	hsa-miR-7-1-3p	CAACAAATCACAGTCTGCCATA	up	inf	inf	0.285296354	0	1.858128746	0	0	0	0	0	0	0	1.639047112	0	9.509725365	0	0	0	0	0	0	0	0	7	0	64	0	low
680	hsa-miR-203a-3p	GTGAAATGTTTAGGACCACTAG	down	0.363804909	-1.458763083	0.288624429	1208.052396	439.4953925	494.4481209	3531.96013	1425.598255	0	588.2554735	219.1350773	288.7732292	530.582965	431.9577447	231.6509663	934.8723724	135	1377	676	0	130	179	752	2266	1189	1559	3774	high
682	hsa-miR-214-3p_1ss22TA	ACAGCAGGCACAGACAGGCAGA	up	1.864538004	0.898818203	0.289902148	12.96053474	24.16540956	0	0	42.17746316	0	22.62521052	17.13905633	12.28822252	44.95672078	25.43064939	19.91098748	25.26682088	0	0	20	0	5	14	32	192	70	134	102	middle
684	hsa-miR-181a-3p	ACCATCGACCGTTGATTGTACC	up	1.522849547	0.606773415	0.290121265	36.85083624	56.11827928	21.97547204	61.55921795	12.65323895	47.34087331	40.72537893	78.34997178	32.25658412	37.2297844	46.86505388	117.9800303	24.02825122	6	24	6	7	9	64	84	159	129	794	97	middle
685	hsa-miR-9-3p_L-1R+1	TAAAGCTAGATAACCGAAAGTA	down	0.636021433	-0.652852712	0.292817922	54.64883152	34.75782814	40.28836541	50.44435916	47.80112492	78.90145551	55.80885261	58.35440606	14.9762712	12.72212758	6.418211514	105.3003965	10.77555596	11	19.66666667	22.66666667	11.66666667	12.33333333	47.66666667	39	54.33333333	17.66666667	708.6666667	43.5	middle
689	hsa-miR-10399-3p_R-1	CTCTCGGACAAGCTGTAGGT	up	inf	inf	0.29624232	0	2.787078028	0	0	0	0	0	0	0	2.107346287	0	0	14.61512188	0	0	0	0	0	0	0	9	0	0	59	middle
690	hsa-miR-138-1-3p_L+2R-2	CGGCTACTTCACAACACCAGGG	up	inf	inf	0.297062413	0	2.432528069	0	0	0	0	0	0	0	0	1.816474957	12.77869346	0	0	0	0	0	0	0	0	0	5	86	0	middle
694	hsa-miR-1296-5p	TTAGGGCCCTGGCTCCATCTCC	up	1.922651354	0.943097174	0.300593151	11.83615478	22.756799	18.31289337	28.21464156	12.65323895	0	0	13.4664014	6.14411126	8.663534733	32.33325423	59.58437299	16.34911939	5	11	6	0	0	11	16	37	89	401	66	middle
695	hsa-miR-196b-3p_R+1	TCGACAGCACGACACTGCCTTCA	up	inf	inf	0.30064079	0	1.990075379	0	0	0	0	0	0	0	1.404897524	10.53555475	0	0	0	0	0	0	0	0	0	6	29	0	0	middle
697	hsa-miR-585-3p_R+3_1ss4GA	TGGACGTATCTGTATGCTAGGG	up	inf	inf	0.303052481	0	2.760636068	0	0	0	0	0	14.69061971	0	1.873196699	0	0	0	0	0	0	0	0	12	0	8	0	0	0	middle
698	hsa-miR-744-3p_R-1	CTGTTGCCACTAACCTCAACC	up	inf	inf	0.303052481	0	3.450795085	0	0	0	0	0	18.36327464	0	2.341495874	0	0	0	0	0	0	0	0	15	0	10	0	0	0	middle
700	hsa-miR-181b-2-3p_R+2	CTCACTGATCAATGAATGCAAA	up	inf	inf	0.303975551	0	4.556386859	0	0	0	0	0	0	0	3.043944636	0	24.29437652	0	0	0	0	0	0	0	0	13	0	163.5	0	middle
704	hsa-mir-548ac-p5	AAAAGTTATTGTGGTTTTTGCT	up	inf	inf	0.307413558	0	1.072465834	0	0	0	0	0	0	5.760104306	0	0.674690698	0	0	0	0	0	0	0	0	15	0	1.857142857	0	0	low
709	hsa-miR-3065-5p	TCAACAAAATCACTGATGCTGGA	up	2.155359361	1.107928429	0.311052201	17.95011057	38.68893884	0	12.82483707	0	0	76.92571576	48.96873236	87.55358546	42.84937449	21.79769948	0	30.96424127	0	5	0	0	17	40	228	183	60	0	125	middle
712	hsa-miR-19a-3p	TGTGCAAATCTATGCAAAACTGA	up	2.236104003	1.16098729	0.312256922	3.077960898	6.882640683	0	15.38980449	0	0	0	8.569528163	10.75219471	6.087889272	9.445669775	0	6.440562184	0	6	0	0	0	7	28	26	26	0	26	middle
713	hsa-miR-183-5p	TATGGCACTGGTAGAATTCACT	down	0.492672358	-1.021299565	0.312614428	5038.641949	2482.39961	4699.088438	4091.123026	3336.237336	7899.16286	5167.598082	249.740535	129.7943504	133.4652648	584.1783461	13439.76796	357.4512012	1283	1595	1582	1168	1142	204	338	570	1608	90449	1443	high
720	hsa-miR-26b-5p_R+1	TTCAAGTAATTCAGGATAGGTT	up	1.382026892	0.466785689	0.317105259	3389.865967	4684.885927	2352.596368	5683.112802	4838.457982	937.8001569	3137.362525	3085.030139	6147.183316	6960.330635	6498.9841	1691.839578	3725.947795	642.3333333	2215.666667	2294.333333	138.6666667	693.3333333	2520	16008	29726	17889	11386	15041.33333	high
724	hsa-miR-663a_L-1R-3	GGCGGGGCGCCGCGGGAC	down	0.26958844	-1.891169462	0.32063184	65.48342638	17.65357474	124.5276749	0	0	202.889457	0	48.96873236	10.75219471	19.20026617	10.89884974	0	16.10140546	34	0	0	30	0	40	28	82	30	0	65	middle
725	hsa-miR-25-5p	AGGCGGAGACTTGGGCAATTG	up	2.287918004	1.194035349	0.321101967	6.762981901	15.47314805	0	0	0	33.8149095	0	6.121091545	23.04041723	7.024487622	2.906359931	28.23199718	25.51453481	0	0	0	5	0	5	60	30	8	190	103	middle
729	hsa-mir-1273h-p3_1ss9TC	CCCAGGCTCAAGCAATCCTCC	up	inf	inf	0.324079466	0	3.929441327	0	0	0	0	0	0	0	0	0	21.84265045	1.733997511	0	0	0	0	0	0	0	0	0	147	7	middle
730	hsa-miR-409-5p	AGGTTACCCGAGCAACTTTGCAT	down	0.408928856	-1.290078224	0.326400591	10.52566573	4.304248447	0	12.82483707	12.65323895	0	27.15025262	0	0	2.809795049	3.996244905	19.01945073	0	0	5	6	0	6	0	0	12	11	128	0	middle
731	hsa-miR-223-3p	TGTCAGTTTGTCAAATACCCCA	down	0.123777707	-3.014176598	0.326599348	136.5243407	16.89866979	18.31289337	107.7286314	0	0	556.5801787	0	20.35236855	5.619590097	3.996244905	64.48782513	6.935990044	5	42	0	0	123	0	53	24	11	434	28	middle
732	hsa-mir-663b-p3	CGGCCGTGCCTGAGGTTTC	up	inf	inf	0.326749682	0	1.992620869	0	0	0	0	0	0	11.13620166	0.819523556	0	0	0	0	0	0	0	0	0	29	3.5	0	0	0	middle
735	hsa-miR-576-3p_R-3	AAGATGTGGAAAAATTGGA	up	inf	inf	0.328839495	0	4.951043928	0	0	0	0	0	0	1.920034769	0	0	27.7862288	0	0	0	0	0	0	0	5	0	0	187	0	middle
737	hsa-miR-216b-5p	AAATCTCTGCAGGCAAATGTGA	up	inf	inf	0.329685767	0	11.52409066	0	0	0	0	0	0	0	0	4.359539896	64.78500405	0	0	0	0	0	0	0	0	0	12	436	0	middle
740	hsa-miR-93-3p_R+1	ACTGCTGAGCTAGCACTTCCCGA	up	1.989100603	0.992116246	0.333863363	8.718564523	17.34210195	25.63805071	17.9547719	0	0	0	0	30.33654935	25.9906042	10.17225976	0.891536753	36.66166166	7	7	0	0	0	0	79	111	28	6	148	middle
742	hsa-mir-4787-p5_1ss6GC	GGCGGCGGTGGCGGCGGC	down	0.142055018	-2.815478296	0.336100455	62.35327538	8.857595682	252.7179285	0	59.04844843	0	0	19.58749294	0	8.195235559	6.539309844	10.40126212	8.422273625	69	0	28	0	0	16	0	35	18	70	34	middle
744	hsa-miR-142-3p_R-1	TGTAGTGTTTCCTACTTTATGG	down	0.396484817	-1.334662476	0.338799049	45.89961641	18.19850099	43.95094408	123.1184359	12.65323895	0	49.77546314	0	0	7.258637209	0	101.9323688	0	12	48	6	0	11	0	0	31	0	686	0	middle
746	hsa-miR-144-3p_R+2	TACAGTATAGATGATGTACTCT	down	0.436910801	-1.194589324	0.340089543	50.62823756	22.12002382	146.5031469	48.73438088	12.65323895	0	45.25042104	13.4664014	16.51229901	34.41998935	2.543064939	55.12668923	10.651699	40	19	6	0	10	11	43	147	7	371	43	middle
748	hsa-miR-449a	TGGCAGTGTATTGTTAGCTGGT	down	0.327545449	-1.610232991	0.340822303	11.46266909	3.754545094	25.63805071	0	0	0	31.67529473	0	6.528118214	6.32203886	4.722834887	0	4.954278603	7	0	0	0	7	0	17	27	13	0	20	middle
749	hsa-mir-8485-p3_1ss20AT	CACACACACACACACACACTC	up	5.697806708	2.510406681	0.341267697	2.564967415	14.61468854	0	12.82483707	0	0	0	0	4.224076491	6.790338034	0	70.72858241	5.945134324	0	5	0	0	0	0	11	29	0	476	24	middle
750	hsa-miR-378i_R+1	ACTGGACTAGGAGTCAGAAGGC	up	13.04456077	3.705376462	0.341514387	33.00526423	430.5391751	40.28836541	15.38980449	5.272182895	0	104.0759684	109.5675387	41.28074753	44.72257119	8.719079792	2319.741484	59.20362931	11	6	2.5	0	23	89.5	107.5	191	24	15611.75	239	high
756	hsa-miR-4508_L+2R-1	AAGCGGGGCTGGGCGCGC	down	0.191246663	-2.38649352	0.348628656	185.1691275	35.41297772	146.5031469	0	42.17746316	737.1650272	0	124.8702675	38.40069538	7.492786797	13.07861969	0.891536753	27.74396018	40	0	20	109	0	102	100	32	36	6	112	middle
758	hsa-miR-210-3p	CTGTGCGTGTGACAGCGGCTGA	down	0.580490819	-0.784654845	0.350120302	118.4158158	68.73929386	164.8160403	146.2031426	113.8791505	67.62981901	99.55092628	22.03592956	9.21616689	29.97114719	13.80520967	298.5162228	38.89108703	45	57	54	10	22	18	24	128	38	2009	157	middle
765	hsa-miR-18a-3p_R+1	ACTGCCCTAAGTGCTCCTTCTGGC	up	inf	inf	0.363217468	0	0.546349037	0	0	0	0	0	0	0	3.278094223	0	0	0	0	0	0	0	0	0	0	14	0	0	0	low
766	hsa-miR-29a-5p_R+3	ACTGATTTCTTTTGGTGTTCAGAGT	up	inf	inf	0.363217468	0	0.195124656	0	0	0	0	0	0	0	1.170747937	0	0	0	0	0	0	0	0	0	0	5	0	0	0	low
767	hsa-mir-33a-p3	TGTTCTGGTGGTACCCATG	up	inf	inf	0.363217468	0	0.605491652	0	0	0	0	0	0	0	0	3.632949913	0	0	0	0	0	0	0	0	0	0	10	0	0	low
768	hsa-miR-92a-2-5p_R+1	GGGTGGGGATTTGTTGCATTACT	up	inf	inf	0.363217468	0	1.21602202	0	0	0	0	0	0	7.296132121	0	0	0	0	0	0	0	0	0	0	19	0	0	0	0	low
769	hsa-miR-96-3p_L+1R-1_1ss11CT	CAATCATGTGTAGTGCCAATAT	up	inf	inf	0.363217468	0	0.594357835	0	0	0	0	0	0	0	0	0	3.566147012	0	0	0	0	0	0	0	0	0	0	24	0	low
770	hsa-miR-122b-5p_R-1	TTTAGTGTGATAATGGCGTTTG	up	inf	inf	0.363217468	0	0.585373968	0	0	0	0	0	0	0	3.512243811	0	0	0	0	0	0	0	0	0	0	15	0	0	0	low
771	hsa-miR-127-5p_R+1	CTGAAGCTCAGAGGGCTCTGATT	up	inf	inf	0.363217468	0	4.556743404	0	0	0	0	0	0	0	0	0	27.34046043	0	0	0	0	0	0	0	0	0	0	184	0	middle
772	hsa-miR-147b-3p_L+1	AGTGTGCGGAAATGCTTCTGCT	up	inf	inf	0.363217468	0	9.163016628	0	0	0	0	0	0	0	0	0	54.97809977	0	0	0	0	0	0	0	0	0	0	370	0	middle
773	hsa-miR-154-5p	TAGGTTATCCGTGTTGCCTTCG	up	inf	inf	0.363217468	0	0.445768377	0	0	0	0	0	0	0	0	0	2.674610259	0	0	0	0	0	0	0	0	0	0	18	0	low
774	hsa-miR-154-3p	AATCATACACGGTTGACCTATT	up	inf	inf	0.363217468	0	0.247649098	0	0	0	0	0	0	0	0	0	1.485894588	0	0	0	0	0	0	0	0	0	0	10	0	low
775	hsa-miR-181b-3p_R+1	CTCACTGAACAATGAATGCAAA	up	inf	inf	0.363217468	0	0.507680651	0	0	0	0	0	0	0	0	0	3.046083906	0	0	0	0	0	0	0	0	0	0	20.5	0	low
776	hsa-miR-182-3p_R-1	TGGTTCTAGACTTGCCAACT	up	inf	inf	0.363217468	0	1.114420941	0	0	0	0	0	0	0	0	0	6.686525648	0	0	0	0	0	0	0	0	0	0	45	0	low
777	hsa-miR-186-3p_L-2R+1	CCAAAGGTGAATTTTTTGGGA	up	inf	inf	0.363217468	0	0.990855721	0	0	0	0	0	0	0	0	0	0	5.945134324	0	0	0	0	0	0	0	0	0	0	24	low
778	hsa-miR-187-5p_L-2R+1	CTACAACACAGGACCCGGGCG	up	inf	inf	0.363217468	0	0.468299175	0	0	0	0	0	0	0	2.809795049	0	0	0	0	0	0	0	0	0	0	12	0	0	0	low
779	hsa-miR-188-5p	CATCCCTTGCATGGTGGAGGG	up	inf	inf	0.363217468	0	1.428254694	0	0	0	0	0	8.569528163	0	0	0	0	0	0	0	0	0	0	7	0	0	0	0	0	low
780	hsa-miR-188-3p_R+1	CTCCCACATGCAGGGTTTGCAA	up	inf	inf	0.363217468	0	0.784427445	0	0	0	0	0	0	0	0	0	0	4.706564673	0	0	0	0	0	0	0	0	0	0	19	low
781	hsa-miR-210-5p_R+1_1ss5CA	AGCCACTGCCCACCGCACACTGC	up	inf	inf	0.363217468	0	0.520063106	0	0	0	0	0	0	0	0	0	3.120378636	0	0	0	0	0	0	0	0	0	0	21	0	low
782	hsa-miR-212-3p_R+1	TAACAGTCTCCAGTCACGGCCA	up	inf	inf	0.363217468	0	0.643887655	0	0	0	0	0	0	0	0	0	3.86332593	0	0	0	0	0	0	0	0	0	0	26	0	low
783	hsa-miR-223-5p_R+1	CGTGTATTTGACAAGCTGAGTTG	up	inf	inf	0.363217468	0	0.31219945	0	0	0	0	0	0	0	1.873196699	0	0	0	0	0	0	0	0	0	0	8	0	0	0	low
785	hsa-mir-325-p3_1ss10CG	AGCACTGTGGTAGGCTCT	up	inf	inf	0.363217468	0	0.371570895	0	0	0	0	0	0	0	0	0	0	2.229425371	0	0	0	0	0	0	0	0	0	0	9	low
786	hsa-miR-329-3p_R-2	AACACACCTGGTTAACCTCT	up	inf	inf	0.363217468	0	0.832015066	0	0	0	0	0	0	4.992090399	0	0	0	0	0	0	0	0	0	0	13	0	0	0	0	low
787	hsa-miR-345-3p_L-1R+1_1ss10GT	CCCTGAACTAGGGGTCTGGAGT	up	inf	inf	0.363217468	0	0.520063106	0	0	0	0	0	0	0	0	0	3.120378636	0	0	0	0	0	0	0	0	0	0	21	0	low
788	hsa-miR-363-5p_R+1	CGGGTGGATCACGATGCAATTTT	up	inf	inf	0.363217468	0	1.131723006	0	0	0	0	0	0	0	6.790338034	0	0	0	0	0	0	0	0	0	0	29	0	0	0	low
789	hsa-miR-369-5p	AGATCGACCGTGTTATATTCGC	up	inf	inf	0.363217468	0	0.965831482	0	0	0	0	0	0	0	0	0	5.794988895	0	0	0	0	0	0	0	0	0	0	39	0	low
790	hsa-miR-374c-5p_L-3R-1_1ss21CA	ATACAACCTGCTAAGTGA	up	inf	inf	0.363217468	0	0.272471243	0	0	0	0	0	0	0	0	1.634827461	0	0	0	0	0	0	0	0	0	0	4.5	0	0	low
791	hsa-miR-377-3p	ATCACACAAAGGCAACTTTTGT	up	inf	inf	0.363217468	0	0.173354369	0	0	0	0	0	0	0	0	0	1.040126212	0	0	0	0	0	0	0	0	0	0	7	0	low
792	hsa-miR-378b_R+2_1ss14GT	ACTGGACTTGGAGTCAGAAAG	up	inf	inf	0.363217468	0	0.078049862	0	0	0	0	0	0	0	0.468299175	0	0	0	0	0	0	0	0	0	0	2	0	0	0	low
793	hsa-miR-378f_R+2_1ss14CT	ACTGGACTTGGAGTCAGAAGTC	up	inf	inf	0.363217468	0	0.117074794	0	0	0	0	0	0	0	0.702448762	0	0	0	0	0	0	0	0	0	0	3	0	0	0	low
794	hsa-miR-382-3p_R+1	AATCATTCACGGACAACACTTT	up	inf	inf	0.363217468	0	1.461129679	0	0	0	0	0	0	0	0	0	8.766778071	0	0	0	0	0	0	0	0	0	0	59	0	low
795	hsa-miR-485-5p	AGAGGCTGGCCGTGATGAATTC	up	inf	inf	0.363217468	0	1.114420941	0	0	0	0	0	0	0	0	0	6.686525648	0	0	0	0	0	0	0	0	0	0	45	0	low
796	hsa-miR-490-3p_R+1	CAACCTGGAGGACTCCATGCTGT	up	inf	inf	0.363217468	0	0.718182384	0	0	0	0	0	0	0	0	0	4.309094306	0	0	0	0	0	0	0	0	0	0	29	0	low
797	hsa-miR-493-3p	TGAAGGTCTACTGTGTGCCAGG	up	inf	inf	0.363217468	0	0.31219945	0	0	0	0	0	0	0	1.873196699	0	0	0	0	0	0	0	0	0	0	8	0	0	0	low
798	hsa-miR-496_L-2R+1_1ss11AC	AGTATTACCTGGCCAATCTCC	up	inf	inf	0.363217468	0	0.148589459	0	0	0	0	0	0	0	0	0	0.891536753	0	0	0	0	0	0	0	0	0	0	6	0	low
799	hsa-miR-504-3p	GGGAGTGCAGGGCAGGGTTTC	up	inf	inf	0.363217468	0	0.990855721	0	0	0	0	0	0	0	0	0	0	5.945134324	0	0	0	0	0	0	0	0	0	0	24	low
800	hsa-miR-513b-5p	TTCACAAGGAGGTGTCATTTAT	up	inf	inf	0.363217468	0	0.516070688	0	0	0	0	0	0	0	0	0	0	3.096424127	0	0	0	0	0	0	0	0	0	0	12.5	low
801	hsa-miR-514b-5p	TTCTCAAGAGGGAGGCAATCAT	up	inf	inf	0.363217468	0	1.444997926	0	0	0	0	0	0	0	0	0	0	8.669987555	0	0	0	0	0	0	0	0	0	0	35	low
802	hsa-miR-514b-3p_2ss9CA19GA	ATTGACACATCTGTGAGTAGA	up	inf	inf	0.363217468	0	11.82524443	0	0	0	0	0	0	0	0	0	70.95146659	0	0	0	0	0	0	0	0	0	0	477.5	0	middle
803	hsa-miR-516a-5p_R-1	TTCTCGAGGAAAGAAGCACTTT	up	inf	inf	0.363217468	0	0.253662053	0	0	0	0	0	0	0	1.521972318	0	0	0	0	0	0	0	0	0	0	6.5	0	0	0	low
804	hsa-miR-522-3p	AAAATGGTTCCCTTTAGAGTGT	up	inf	inf	0.363217468	0	0.302745826	0	0	0	0	0	0	0	0	1.816474957	0	0	0	0	0	0	0	0	0	0	5	0	0	low
805	hsa-miR-542-5p_L-1	CGGGGATCATCATGTCACGAGA	up	inf	inf	0.363217468	0	0.726589983	0	0	0	0	0	0	0	0	4.359539896	0	0	0	0	0	0	0	0	0	0	12	0	0	low
806	hsa-miR-548aj-3p_1ss21AG	TAAAAACTGCAATTACTTTTG	up	inf	inf	0.363217468	0	0.058537397	0	0	0	0	0	0	0	0.351224381	0	0	0	0	0	0	0	0	0	0	1.5	0	0	0	low
807	hsa-miR-548h-5p_L+1R-1	CAAAAGTAATCGCGGTTTTTGT	up	inf	inf	0.363217468	0	0.049542786	0	0	0	0	0	0	0	0	0	0	0.297256716	0	0	0	0	0	0	0	0	0	0	1.2	low
808	hsa-miR-548az-3p_L+1R-3	CAAAAACTGCAATCACTTT	up	inf	inf	0.363217468	0	0.544942487	0	0	0	0	0	0	0	0	3.269654922	0	0	0	0	0	0	0	0	0	0	9	0	0	low
809	hsa-mir-548x-2-p5_1ss17TG	AAGTAATTGTGGCTTTGGC	up	inf	inf	0.363217468	0	0.816145539	0	0	0	0	0	4.896873236	0	0	0	0	0	0	0	0	0	0	4	0	0	0	0	0	low
810	hsa-miR-548x-3p_R+1_1ss20CT	TAAAAACTGCAATTACTTTTG	up	inf	inf	0.363217468	0	0.058537397	0	0	0	0	0	0	0	0.351224381	0	0	0	0	0	0	0	0	0	0	1.5	0	0	0	low
811	hsa-miR-548b-5p_L-2R-1_1ss15TC	AAGTAATTGTGGCTTTGGC	up	inf	inf	0.363217468	0	0.816145539	0	0	0	0	0	4.896873236	0	0	0	0	0	0	0	0	0	0	4	0	0	0	0	0	low
812	hsa-mir-548aa-1-p5_1ss12CT	TGCAAAAGAAATTGTGGTTTTT	up	inf	inf	0.363217468	0	0.173354369	0	0	0	0	0	0	0	0	0	1.040126212	0	0	0	0	0	0	0	0	0	0	7	0	low
813	hsa-miR-548aq-3p_R-1_1ss1CT	TAAAAACTGCAATTACTTTTG	up	inf	inf	0.363217468	0	0.058537397	0	0	0	0	0	0	0	0.351224381	0	0	0	0	0	0	0	0	0	0	1.5	0	0	0	low
814	hsa-mir-548y-p3_1ss2CT	GTAAAAACCGTGATTACTTTTG	up	inf	inf	0.363217468	0	1.27153247	0	0	0	0	0	0	0	0	7.629194818	0	0	0	0	0	0	0	0	0	0	21	0	0	low
815	hsa-miR-548ap-5p_L+1R+3	CAAAAGTAATTGCGGTCTTTGGT	up	inf	inf	0.363217468	0	0.234149587	0	0	0	0	0	0	0	1.404897524	0	0	0	0	0	0	0	0	0	0	6	0	0	0	low
816	hsa-miR-548w_R-1	AAAAGTAACTGCGGTTTTTGCC	up	inf	inf	0.363217468	0	0.605491652	0	0	0	0	0	0	0	0	3.632949913	0	0	0	0	0	0	0	0	0	0	10	0	0	low
817	hsa-miR-548f-3p_L+1R+2	CAAAAACTGTAATTACTTTTGC	up	inf	inf	0.363217468	0	0.333020409	0	0	0	0	0	0	0	0	1.998122452	0	0	0	0	0	0	0	0	0	0	5.5	0	0	low
818	hsa-mir-548h-1-p3_1ss10GC	TAAAAACTGCAATTACTTTTG	up	inf	inf	0.363217468	0	0.058537397	0	0	0	0	0	0	0	0.351224381	0	0	0	0	0	0	0	0	0	0	1.5	0	0	0	low
819	hsa-mir-548aa-2-p5_1ss12CT	TGCAAAAGAAATTGTGGTTTTT	up	inf	inf	0.363217468	0	0.173354369	0	0	0	0	0	0	0	0	0	1.040126212	0	0	0	0	0	0	0	0	0	0	7	0	low
820	hsa-miR-551a	GCGACCCACTCTTGGTTTCCA	up	inf	inf	0.363217468	0	0.390249312	0	0	0	0	0	0	0	2.341495874	0	0	0	0	0	0	0	0	0	0	10	0	0	0	low
821	hsa-mir-558-p3_1ss9TG	TCCTGAGCGGCTGTACCA	up	inf	inf	0.363217468	0	0.302745826	0	0	0	0	0	0	0	0	1.816474957	0	0	0	0	0	0	0	0	0	0	5	0	0	low
822	hsa-miR-579-5p_L+1R-1	ATCGCGGTTTGTGCCAGATGAC	up	inf	inf	0.363217468	0	0.507324106	0	0	0	0	0	0	0	3.043944636	0	0	0	0	0	0	0	0	0	0	13	0	0	0	low
823	hsa-miR-580-3p_R+1	TTGAGAATGATGAATCATTAGGA	up	inf	inf	0.363217468	0	0.832015066	0	0	0	0	0	0	4.992090399	0	0	0	0	0	0	0	0	0	0	13	0	0	0	0	low
824	hsa-miR-589-3p_1ss24AT	TCAGAACAAATGCCGGTTCCCAGT	up	inf	inf	0.363217468	0	0.363294991	0	0	0	0	0	0	0	0	2.179769948	0	0	0	0	0	0	0	0	0	0	6	0	0	low
825	hsa-miR-592	TTGTGTCAATATGCGATGATGT	up	inf	inf	0.363217468	0	0.544828016	0	0	0	0	0	0	0	0	0	3.268968094	0	0	0	0	0	0	0	0	0	0	22	0	low
826	hsa-miR-610_L+2	TGTGAGCTAAATGTGTGCTGGGA	up	inf	inf	0.363217468	0	0.454142205	0	0	0	0	0	0	0	0	0	0	2.724853232	0	0	0	0	0	0	0	0	0	0	11	low
827	hsa-miR-615-5p_R-1	GGGGGTCCCCGGTGCTCGGAT	up	inf	inf	0.363217468	0	0.544942487	0	0	0	0	0	0	0	0	3.269654922	0	0	0	0	0	0	0	0	0	0	9	0	0	low
828	hsa-miR-616-5p	ACTCAAAACCCTTCAGTGACTT	up	inf	inf	0.363217468	0	0.234149587	0	0	0	0	0	0	0	1.404897524	0	0	0	0	0	0	0	0	0	0	6	0	0	0	low
829	hsa-miR-624-5p_R-1	TAGTACCAGTACCTTGTGTTC	up	inf	inf	0.363217468	0	0.468299175	0	0	0	0	0	0	0	2.809795049	0	0	0	0	0	0	0	0	0	0	12	0	0	0	low
830	hsa-miR-627-5p_R-4	GTGAGTCTCTAAGAAAAG	up	inf	inf	0.363217468	0	2.040363848	0	0	0	0	0	12.24218309	0	0	0	0	0	0	0	0	0	0	10	0	0	0	0	0	middle
831	hsa-mir-638-p5_1ss14AG	CGGGTGGCGGCCTGGGGC	up	inf	inf	0.363217468	0	1.632291079	0	0	0	0	0	9.793746472	0	0	0	0	0	0	0	0	0	0	8	0	0	0	0	0	low
832	hsa-mir-641-p3	TGACTGTCCTATGTCTTTCCT	up	inf	inf	0.363217468	0	0.546349037	0	0	0	0	0	0	0	3.278094223	0	0	0	0	0	0	0	0	0	0	14	0	0	0	low
833	hsa-mir-645-p3_1ss12AG	CCTGGGGGTTGGGGACCCC	up	inf	inf	0.363217468	0	1.024018543	0	0	0	0	0	0	6.14411126	0	0	0	0	0	0	0	0	0	0	16	0	0	0	0	low
834	hsa-miR-656-3p	AATATTATACAGTCAACCTCT	up	inf	inf	0.363217468	0	0.666040817	0	0	0	0	0	0	0	0	3.996244905	0	0	0	0	0	0	0	0	0	0	11	0	0	low
835	hsa-mir-661-p5_1ss10TG	GAGAGGCTGGGCTGTGGG	up	inf	inf	0.363217468	0	1.536027815	0	0	0	0	0	0	9.21616689	0	0	0	0	0	0	0	0	0	0	24	0	0	0	0	low
836	hsa-miR-664b-3p	TTCATTTGCCTCCCAGCCTACA	up	inf	inf	0.363217468	0	0.371570895	0	0	0	0	0	0	0	0	0	0	2.229425371	0	0	0	0	0	0	0	0	0	0	9	low
837	hsa-miR-668-3p_R-2	TGTCACTCGGCTCGGCCCACT	up	inf	inf	0.363217468	0	2.352666432	0	0	0	0	0	0	0	0	0	14.11599859	0	0	0	0	0	0	0	0	0	0	95	0	middle
838	hsa-mir-675-p5_1ss14TC	CTTGGTGACGCTGCATGCCCT	up	inf	inf	0.363217468	0	2.228841883	0	0	0	0	0	0	0	0	0	13.3730513	0	0	0	0	0	0	0	0	0	0	90	0	middle
839	hsa-miR-711_L+1R-5	GGGGACCCAGGGAGAGAC	up	inf	inf	0.363217468	0	0.351224381	0	0	0	0	0	0	0	2.107346287	0	0	0	0	0	0	0	0	0	0	9	0	0	0	low
840	hsa-miR-766-5p_R+1	AGGAGGAATTGGTGCTGGTCTTT	up	inf	inf	0.363217468	0	0.31219945	0	0	0	0	0	0	0	1.873196699	0	0	0	0	0	0	0	0	0	0	8	0	0	0	low
841	hsa-miR-873-5p_L+1R-3	TGCAGGAACTTGTGAGTCT	up	inf	inf	0.363217468	0	0.272414008	0	0	0	0	0	0	0	0	0	1.634484047	0	0	0	0	0	0	0	0	0	0	11	0	low
842	hsa-miR-874-5p_R-2	CGGCCCCACGCACCAGGGTAA	up	inf	inf	0.363217468	0	0.423844157	0	0	0	0	0	0	0	0	2.543064939	0	0	0	0	0	0	0	0	0	0	7	0	0	low
843	hsa-miR-877-3p_L+2_1ss23GT	TGTCCTCTTCTCCCTCCTCCCAT	up	inf	inf	0.363217468	0	0.619122745	0	0	0	0	0	0	0	0	0	3.714736471	0	0	0	0	0	0	0	0	0	0	25	0	low
844	hsa-mir-887-p5	CCTGTTAGACTCTGGATTTTACACT	up	inf	inf	0.363217468	0	0.858548487	0	0	0	0	0	0	0	5.151290923	0	0	0	0	0	0	0	0	0	0	22	0	0	0	low
845	hsa-miR-891b	TGCAACTTACCTGAGTCATTGA	up	inf	inf	0.363217468	0	0.429274244	0	0	0	0	0	0	0	2.575645461	0	0	0	0	0	0	0	0	0	0	11	0	0	0	low
846	hsa-mir-892a-p5	TACTCAGAAAGGTGCCAGTCA	up	inf	inf	0.363217468	0	0.31219945	0	0	0	0	0	0	0	1.873196699	0	0	0	0	0	0	0	0	0	0	8	0	0	0	low
848	hsa-miR-935_L-1	CAGTTACCGCTTCCGCTACCGC	up	inf	inf	0.363217468	0	1.428254694	0	0	0	0	0	8.569528163	0	0	0	0	0	0	0	0	0	0	7	0	0	0	0	0	low
849	hsa-miR-1179	AAGCATTCTTTCATTGGTTGG	up	inf	inf	0.363217468	0	0.351224381	0	0	0	0	0	0	0	2.107346287	0	0	0	0	0	0	0	0	0	0	9	0	0	0	low
850	hsa-miR-1185-1-3p_R-1	ATATACAGGGGGAGACTCTTA	up	inf	inf	0.363217468	0	0.544942487	0	0	0	0	0	0	0	0	3.269654922	0	0	0	0	0	0	0	0	0	0	9	0	0	low
851	hsa-mir-1207-p5_1ss18GC	TGGGAGGGGCTGGCTGGC	up	inf	inf	0.363217468	0	0.351224381	0	0	0	0	0	0	0	2.107346287	0	0	0	0	0	0	0	0	0	0	9	0	0	0	low
852	hsa-miR-1226-5p	GTGAGGGCATGCAGGCCTGGATGGGG	up	inf	inf	0.363217468	0	0.302745826	0	0	0	0	0	0	0	0	1.816474957	0	0	0	0	0	0	0	0	0	0	5	0	0	low
853	hsa-miR-1226-3p	TCACCAGCCCTGTGTTCCCTAG	up	inf	inf	0.363217468	0	0.363294991	0	0	0	0	0	0	0	0	2.179769948	0	0	0	0	0	0	0	0	0	0	6	0	0	low
854	hsa-miR-1229-3p_L+1R-1	CCTCTCACCACTGCCCTCCCACA	up	inf	inf	0.363217468	0	1.536027815	0	0	0	0	0	0	9.21616689	0	0	0	0	0	0	0	0	0	0	24	0	0	0	0	low
855	hsa-miR-1247-5p	ACCCGTCCCGTTCGTCCCCGGA	up	inf	inf	0.363217468	0	0.520063106	0	0	0	0	0	0	0	0	0	3.120378636	0	0	0	0	0	0	0	0	0	0	21	0	low
856	hsa-miR-1255a	AGGATGAGCAAAGAAAGTAGATT	up	inf	inf	0.363217468	0	0.288999585	0	0	0	0	0	0	0	0	0	0	1.733997511	0	0	0	0	0	0	0	0	0	0	7	low
857	hsa-miR-1257_L+5	TGGGGAGTGAATGATGGGTTCTGACC	up	inf	inf	0.363217468	0	0.234149587	0	0	0	0	0	0	0	1.404897524	0	0	0	0	0	0	0	0	0	0	6	0	0	0	low
858	hsa-mir-1260b-p3_1ss3CG	TGGTGCTGGTGGTGATGGT	up	inf	inf	0.363217468	0	0.41285655	0	0	0	0	0	0	0	0	0	0	2.477139301	0	0	0	0	0	0	0	0	0	0	10	low
859	hsa-miR-1262_L+1_1ss23TA	GATGGGTGAATTTGTAGAAGGAA	up	inf	inf	0.363217468	0	0.363294991	0	0	0	0	0	0	0	0	2.179769948	0	0	0	0	0	0	0	0	0	0	6	0	0	low
860	hsa-miR-1263	ATGGTACCCTGGCATACTGAGT	up	inf	inf	0.363217468	0	0.8257131	0	0	0	0	0	0	0	0	0	0	4.954278603	0	0	0	0	0	0	0	0	0	0	20	low
861	hsa-miR-1284_R-2	TCTATACAGACCCTGGCTTT	up	inf	inf	0.363217468	0	0.484393322	0	0	0	0	0	0	0	0	2.906359931	0	0	0	0	0	0	0	0	0	0	8	0	0	low
862	hsa-miR-1291_R+2	TGGCCCTGACTGAAGACCAGCAGTTG	up	inf	inf	0.363217468	0	1.651426201	0	0	0	0	0	0	0	0	0	0	9.908557206	0	0	0	0	0	0	0	0	0	0	40	low
863	hsa-miR-1294	TGTGAGGTTGGCATTGTTGTCT	up	inf	inf	0.363217468	0	0.605491652	0	0	0	0	0	0	0	0	3.632949913	0	0	0	0	0	0	0	0	0	0	10	0	0	low
864	hsa-miR-1298-5p	TTCATTCGGCTGTCCAGATGTA	up	inf	inf	0.363217468	0	0.123824549	0	0	0	0	0	0	0	0	0	0.742947294	0	0	0	0	0	0	0	0	0	0	5	0	low
865	hsa-miR-1306-5p_R-1	CCACCTCCCCTGCAAACGTCC	up	inf	inf	0.363217468	0	0.396238557	0	0	0	0	0	0	0	0	0	2.377431341	0	0	0	0	0	0	0	0	0	0	16	0	low
866	hsa-miR-1306-3p_R+2	ACGTTGGCTCTGGTGGTGAT	up	inf	inf	0.363217468	0	3.76426629	0	0	0	0	0	0	0	0	0	22.58559774	0	0	0	0	0	0	0	0	0	0	152	0	middle
867	hsa-miR-1323	TCAAAACTGAGGGGCATTTTCT	up	inf	inf	0.363217468	0	0.234149587	0	0	0	0	0	0	0	1.404897524	0	0	0	0	0	0	0	0	0	0	6	0	0	0	low
868	hsa-miR-1910-3p_R+1	GAGGCAGAAGCAGGATGACAA	up	inf	inf	0.363217468	0	1.408025497	0	0	0	0	0	0	8.448152983	0	0	0	0	0	0	0	0	0	0	22	0	0	0	0	low
869	hsa-mir-2110-p3_1ss15CA	CACCGCGGTCTTTTACTCCCACT	up	inf	inf	0.363217468	0	0.423844157	0	0	0	0	0	0	0	0	2.543064939	0	0	0	0	0	0	0	0	0	0	7	0	0	low
870	hsa-miR-2116-5p_R+2	GGTTCTTAGCATAGGAGGTCTTT	up	inf	inf	0.363217468	0	0.768013908	0	0	0	0	0	0	4.608083445	0	0	0	0	0	0	0	0	0	0	12	0	0	0	0	low
871	hsa-miR-2278_R+1	GAGAGCAGTGTGTGTTGCCTGGA	up	inf	inf	0.363217468	0	0.273174519	0	0	0	0	0	0	0	1.639047112	0	0	0	0	0	0	0	0	0	0	7	0	0	0	low
872	hsa-miR-3059-5p_R-3	TTTCCTCTCTGCCCCATAGGG	up	inf	inf	0.363217468	0	0.123824549	0	0	0	0	0	0	0	0	0	0.742947294	0	0	0	0	0	0	0	0	0	0	5	0	low
873	hsa-miR-3074-5p_L-1R+1	TTCCTGCTGAACTGAGCCAGT	up	inf	inf	0.363217468	0	0.423844157	0	0	0	0	0	0	0	0	2.543064939	0	0	0	0	0	0	0	0	0	0	7	0	0	low
874	hsa-miR-3085-5p_L+1_1ss25GT	AAGGTGCCATTCTGAGGGCCAGGATT	up	inf	inf	0.363217468	0	0.536713515	0	0	0	0	0	0	0	0	0	0	3.220281092	0	0	0	0	0	0	0	0	0	0	13	low
875	hsa-miR-3085-3p_R+1	TCTGGCTGCTATGGCCCCCTCT	up	inf	inf	0.363217468	0	0.842006933	0	0	0	0	0	0	0	0	0	5.0520416	0	0	0	0	0	0	0	0	0	0	34	0	low
876	hsa-miR-3117-3p_L-1R+2_1ss4GA	TAAGACTCATATAGTGCCAGGT	up	inf	inf	0.363217468	0	0.605491652	0	0	0	0	0	0	0	0	3.632949913	0	0	0	0	0	0	0	0	0	0	10	0	0	low
877	hsa-miR-3120-3p_R-1_1ss20CT	CACAGCAAGTGTAGACAGGT	up	inf	inf	0.363217468	0	0.302745826	0	0	0	0	0	0	0	0	1.816474957	0	0	0	0	0	0	0	0	0	0	5	0	0	low
878	hsa-miR-3125_R+2	TAGAGGAAGCTGTGGAGAGAAC	up	inf	inf	0.363217468	0	0.484393322	0	0	0	0	0	0	0	0	2.906359931	0	0	0	0	0	0	0	0	0	0	8	0	0	low
879	hsa-miR-3141_R+4	GAGGGCGGGTGGAGGAGGAGGGC	up	inf	inf	0.363217468	0	0.351224381	0	0	0	0	0	0	0	2.107346287	0	0	0	0	0	0	0	0	0	0	9	0	0	0	low
880	hsa-miR-3165_R-2	AGGTGGATGCAATGTGACCT	up	inf	inf	0.363217468	0	0.429274244	0	0	0	0	0	0	0	2.575645461	0	0	0	0	0	0	0	0	0	0	11	0	0	0	low
881	hsa-miR-3168_R+1_1ss14AC	GAGTTCTACAGTCCGACA	up	inf	inf	0.363217468	0	1.015361302	0	0	0	0	0	0	0	0	0	6.092167812	0	0	0	0	0	0	0	0	0	0	41	0	low
882	hsa-miR-3174_R+1	TAGTGAGTTAGAGATGCAGAGCCT	up	inf	inf	0.363217468	0	0.195124656	0	0	0	0	0	0	0	1.170747937	0	0	0	0	0	0	0	0	0	0	5	0	0	0	low
883	hsa-miR-3176_R+3	ACTGGCCTGGGACTACCGGGGA	up	inf	inf	0.363217468	0	1.632291079	0	0	0	0	0	9.793746472	0	0	0	0	0	0	0	0	0	0	8	0	0	0	0	0	low
884	hsa-miR-3181_R+3	ATCGGGCCCTCGGCGCCGGCCC	up	inf	inf	0.363217468	0	0.546349037	0	0	0	0	0	0	0	3.278094223	0	0	0	0	0	0	0	0	0	0	14	0	0	0	low
885	hsa-miR-3187-3p_R+2	TTGGCCATGGGGCTGCGCGGGG	up	inf	inf	0.363217468	0	0.663423831	0	0	0	0	0	0	0	3.980542986	0	0	0	0	0	0	0	0	0	0	17	0	0	0	low
886	hsa-mir-3199-1-p3	TTTCTCCTAAGGCAGTCCCTGG	up	inf	inf	0.363217468	0	0.433499378	0	0	0	0	0	0	0	0	0	0	2.600996267	0	0	0	0	0	0	0	0	0	0	10.5	low
887	hsa-mir-3199-2-p3	TTTCTCCTAAGGCAGTCCCTGG	up	inf	inf	0.363217468	0	0.433499378	0	0	0	0	0	0	0	0	0	0	2.600996267	0	0	0	0	0	0	0	0	0	0	10.5	low
888	hsa-miR-3659_R-1	TGAGTGTTGTCTACGAGGGC	up	inf	inf	0.363217468	0	0.484393322	0	0	0	0	0	0	0	0	2.906359931	0	0	0	0	0	0	0	0	0	0	8	0	0	low
889	hsa-miR-3677-3p_R-1	CTCGTGGGCTCTGGCCACGGC	up	inf	inf	0.363217468	0	1.073427031	0	0	0	0	0	0	0	0	0	0	6.440562184	0	0	0	0	0	0	0	0	0	0	26	low
890	hsa-miR-3688-3p	TATGGAAAGACTTTGCCACTCT	up	inf	inf	0.363217468	0	0.288999585	0	0	0	0	0	0	0	0	0	0	1.733997511	0	0	0	0	0	0	0	0	0	0	7	low
891	hsa-mir-3909-p5_1ss22GT	GAGCAGGCTCCGGGGGACAGGTA	up	inf	inf	0.363217468	0	0.585373968	0	0	0	0	0	0	0	3.512243811	0	0	0	0	0	0	0	0	0	0	15	0	0	0	low
892	hsa-miR-3910_L+1	AAAAGGCATAAAACCAAGACA	up	inf	inf	0.363217468	0	0.273174519	0	0	0	0	0	0	0	1.639047112	0	0	0	0	0	0	0	0	0	0	7	0	0	0	low
893	hsa-mir-3911-p5_1ss9CA	GGAGGAGGAAGAGAAGAC	up	inf	inf	0.363217468	0	1.224218309	0	0	0	0	0	7.345309854	0	0	0	0	0	0	0	0	0	0	6	0	0	0	0	0	low
894	hsa-miR-3913-5p_L-1	TTGGGACTGATCTTGATGTCT	up	inf	inf	0.363217468	0	0.612109155	0	0	0	0	0	3.672654927	0	0	0	0	0	0	0	0	0	0	3	0	0	0	0	0	low
895	hsa-miR-3918_L+1_1ss22TA	GACAGGGCCGCAGATGGAGACA	up	inf	inf	0.363217468	0	0.351224381	0	0	0	0	0	0	0	2.107346287	0	0	0	0	0	0	0	0	0	0	9	0	0	0	low
896	hsa-mir-3919-p5	TACTGAGTCCTTTGTTCTCTACT	up	inf	inf	0.363217468	0	0.507324106	0	0	0	0	0	0	0	3.043944636	0	0	0	0	0	0	0	0	0	0	13	0	0	0	low
897	hsa-miR-3925-5p_R-1	AAGAGAACTGAAAGTGGAGCC	up	inf	inf	0.363217468	0	0.605491652	0	0	0	0	0	0	0	0	3.632949913	0	0	0	0	0	0	0	0	0	0	10	0	0	low
898	hsa-miR-3934-5p_R+1	TCAGGTGTGGAAACTGAGGCAGG	up	inf	inf	0.363217468	0	0.546349037	0	0	0	0	0	0	0	3.278094223	0	0	0	0	0	0	0	0	0	0	14	0	0	0	low
899	hsa-miR-3942-3p_R+1	TTTCAGATAACAGTATTACATC	up	inf	inf	0.363217468	0	0.726589983	0	0	0	0	0	0	0	0	4.359539896	0	0	0	0	0	0	0	0	0	0	12	0	0	low
900	hsa-mir-4258-p5_1ss16AC	GCCCCCCGCCCCGCCCCC	up	inf	inf	0.363217468	0	1.073427031	0	0	0	0	0	0	0	0	0	0	6.440562184	0	0	0	0	0	0	0	0	0	0	26	low
901	hsa-mir-4285-p5_1ss16TC	AGGCGGGGCGGCGAGCCC	up	inf	inf	0.363217468	0	17.31067195	0	0	0	0	0	0	0	0	0	103.8640317	0	0	0	0	0	0	0	0	0	0	699	0	middle
902	hsa-mir-4313-p3_1ss4CT	ATGTTGGGCTTGGGTGGGG	up	inf	inf	0.363217468	0	0.507324106	0	0	0	0	0	0	0	3.043944636	0	0	0	0	0	0	0	0	0	0	13	0	0	0	low
903	hsa-mir-4418-p5_1ss6GA	TGACCATGGTGGTTGTGG	up	inf	inf	0.363217468	0	0.273174519	0	0	0	0	0	0	0	1.639047112	0	0	0	0	0	0	0	0	0	0	7	0	0	0	low
904	hsa-miR-4423-3p_L+1R-1	CATAGGCACCAAAAAGCAACA	up	inf	inf	0.363217468	0	1.088019702	0	0	0	0	0	0	6.528118214	0	0	0	0	0	0	0	0	0	0	17	0	0	0	0	low
905	hsa-mir-4430-p5_1ss4GC	AGCCGAGATCGTACCACTGC	up	inf	inf	0.363217468	0	1.224218309	0	0	0	0	0	7.345309854	0	0	0	0	0	0	0	0	0	0	6	0	0	0	0	0	low
906	hsa-miR-4443_R+1	TTGGAGGCGTGGGTTTTT	up	inf	inf	0.363217468	0	0.605491652	0	0	0	0	0	0	0	0	3.632949913	0	0	0	0	0	0	0	0	0	0	10	0	0	low
907	hsa-mir-4444-1-p5_1ss11GT	GACTGGCCCCTCCTCTTCC	up	inf	inf	0.363217468	0	2.426961161	0	0	0	0	0	0	0	0	0	14.56176697	0	0	0	0	0	0	0	0	0	0	98	0	middle
908	hsa-mir-4485-p3_1ss20TC	ACGGCCGCGGTACCCTAACCGTG	up	inf	inf	0.363217468	0	0.866998756	0	0	0	0	0	0	0	0	0	0	5.201992533	0	0	0	0	0	0	0	0	0	0	21	low
909	hsa-miR-4489	TGGGGCTAGTGATGCAGGACG	up	inf	inf	0.363217468	0	0.429274244	0	0	0	0	0	0	0	2.575645461	0	0	0	0	0	0	0	0	0	0	11	0	0	0	low
910	hsa-mir-4507-p3_1ss17GA	AGCTGGGTTGGGCTGGAC	up	inf	inf	0.363217468	0	0.351224381	0	0	0	0	0	0	0	2.107346287	0	0	0	0	0	0	0	0	0	0	9	0	0	0	low
911	hsa-miR-4525_L-1R+2	GGGGGATGTGCATGCTGGTTGA	up	inf	inf	0.363217468	0	1.053673143	0	0	0	0	0	0	0	6.32203886	0	0	0	0	0	0	0	0	0	0	27	0	0	0	low
912	hsa-miR-4535_L+2	AGGTGGACCTGGCTGGGAC	up	inf	inf	0.363217468	0	0.363294991	0	0	0	0	0	0	0	0	2.179769948	0	0	0	0	0	0	0	0	0	0	6	0	0	low
913	hsa-miR-4536-5p_L-2R+2	TGGTAGATATATGCACGATAT	up	inf	inf	0.363217468	0	0.253662053	0	0	0	0	0	0	0	1.521972318	0	0	0	0	0	0	0	0	0	0	6.5	0	0	0	low
914	hsa-mir-4537-p3	GGCTGGGCTGAGCTGGGC	up	inf	inf	0.363217468	0	1.836327464	0	0	0	0	0	11.01796478	0	0	0	0	0	0	0	0	0	0	9	0	0	0	0	0	middle
915	hsa-miR-4644_L-2R+1	GAGAGAGAAAAGAGACAGAAGT	up	inf	inf	0.363217468	0	0.351224381	0	0	0	0	0	0	0	2.107346287	0	0	0	0	0	0	0	0	0	0	9	0	0	0	low
916	hsa-miR-4649-5p_L-5R+2	GAGGGGTGGGCTCTCAGAGGG	up	inf	inf	0.363217468	0	0.741473693	0	0	0	0	0	0	0	4.44884216	0	0	0	0	0	0	0	0	0	0	19	0	0	0	low
917	hsa-mir-4655-p5_1ss11CG	AAGGGCACACGGGGGATG	up	inf	inf	0.363217468	0	1.280023179	0	0	0	0	0	0	7.680139075	0	0	0	0	0	0	0	0	0	0	20	0	0	0	0	low
918	hsa-miR-4667-5p	ACTGGGGAGCAGAAGGAGAACC	up	inf	inf	0.363217468	0	1.280023179	0	0	0	0	0	0	7.680139075	0	0	0	0	0	0	0	0	0	0	20	0	0	0	0	low
919	hsa-miR-4671-3p_L+1_1ss22TA	ATTAGTGCATAGTCTTTGGTCA	up	inf	inf	0.363217468	0	0.507324106	0	0	0	0	0	0	0	3.043944636	0	0	0	0	0	0	0	0	0	0	13	0	0	0	low
920	hsa-miR-4709-5p	ACAACAGTGACTTGCTCTCCAA	up	inf	inf	0.363217468	0	0.693417475	0	0	0	0	0	0	0	0	0	4.160504847	0	0	0	0	0	0	0	0	0	0	28	0	low
921	hsa-miR-4723-3p	CCCTCTCTGGCTCCTCCCCAAA	up	inf	inf	0.363217468	0	0.546349037	0	0	0	0	0	0	0	3.278094223	0	0	0	0	0	0	0	0	0	0	14	0	0	0	low
922	hsa-miR-4728-5p_R-1_1ss22CA	TGGGAGGGGAGAGGCAGCAAGA	up	inf	inf	0.363217468	0	0.784427445	0	0	0	0	0	0	0	0	0	0	4.706564673	0	0	0	0	0	0	0	0	0	0	19	low
923	hsa-miR-4732-5p_R-2	TGTAGAGCAGGGAGCAGGAAG	up	inf	inf	0.363217468	0	2.368042882	0	0	0	0	0	0	14.20825729	0	0	0	0	0	0	0	0	0	0	37	0	0	0	0	middle
924	hsa-mir-4734-p5_1ss5GC	GACCCCGCCGGCCCGCACC	up	inf	inf	0.363217468	0	0.468299175	0	0	0	0	0	0	0	2.809795049	0	0	0	0	0	0	0	0	0	0	12	0	0	0	low
925	hsa-miR-4742-3p_R-2_1ss21CA	TCTGTATTCTCCTTTGCCTGA	up	inf	inf	0.363217468	0	1.020181924	0	0	0	0	0	6.121091545	0	0	0	0	0	0	0	0	0	0	5	0	0	0	0	0	low
926	hsa-mir-4757-p5	CCCGAGGCCTCTGTGACGTCA	up	inf	inf	0.363217468	0	0.780498625	0	0	0	0	0	0	0	4.682991748	0	0	0	0	0	0	0	0	0	0	20	0	0	0	low
927	hsa-mir-4758-p5	TGGGAGCCGGTGGGGCTGGA	up	inf	inf	0.363217468	0	0.468299175	0	0	0	0	0	0	0	2.809795049	0	0	0	0	0	0	0	0	0	0	12	0	0	0	low
928	hsa-miR-4763-3p_L-6	GGGCTGGTGCTGGGCGGG	up	inf	inf	0.363217468	0	0.234149587	0	0	0	0	0	0	0	1.404897524	0	0	0	0	0	0	0	0	0	0	6	0	0	0	low
929	hsa-miR-4768-5p	ATTCTCTCTGGATCCCATGGAT	up	inf	inf	0.363217468	0	1.224218309	0	0	0	0	0	7.345309854	0	0	0	0	0	0	0	0	0	0	6	0	0	0	0	0	low
930	hsa-miR-4768-3p_L+1_1ss21TA	TCCAGGAGATCCAGAGAGAAA	up	inf	inf	0.363217468	0	0.351224381	0	0	0	0	0	0	0	2.107346287	0	0	0	0	0	0	0	0	0	0	9	0	0	0	low
931	hsa-miR-4779_L-4	AGGGAATAGTAAAAGCAG	up	inf	inf	0.363217468	0	0.544942487	0	0	0	0	0	0	0	0	3.269654922	0	0	0	0	0	0	0	0	0	0	9	0	0	low
932	hsa-miR-4781-3p_R+1	AATGTTGGAATCCTCGCTAGAGC	up	inf	inf	0.363217468	0	0.363294991	0	0	0	0	0	0	0	0	2.179769948	0	0	0	0	0	0	0	0	0	0	6	0	0	low
933	hsa-mir-4784-p5_1ss19GT	TGACTGGGCTGAGGAGATTC	up	inf	inf	0.363217468	0	0.31219945	0	0	0	0	0	0	0	1.873196699	0	0	0	0	0	0	0	0	0	0	8	0	0	0	low
934	hsa-mir-4785-p5_1ss4TG	TCCGCCGCTGCCGCCGGG	up	inf	inf	0.363217468	0	0.41285655	0	0	0	0	0	0	0	0	0	0	2.477139301	0	0	0	0	0	0	0	0	0	0	10	low
935	hsa-miR-4798-5p	TTCGGTATACTTTGTGAATTGG	up	inf	inf	0.363217468	0	1.279855306	0	0	0	0	0	0	0	0	0	0	7.679131835	0	0	0	0	0	0	0	0	0	0	31	low
936	hsa-mir-5006-p5	GCAGGAGGTGGAAGGGAGCCC	up	inf	inf	0.363217468	0	0.8257131	0	0	0	0	0	0	0	0	0	0	4.954278603	0	0	0	0	0	0	0	0	0	0	20	low
937	hsa-miR-5006-3p_R+1	TTTCCCTTTCCATCCTGGCAGT	up	inf	inf	0.363217468	0	0.663423831	0	0	0	0	0	0	0	3.980542986	0	0	0	0	0	0	0	0	0	0	17	0	0	0	low
938	hsa-miR-5010-5p	AGGGGGATGGCAGAGCAAAATT	up	inf	inf	0.363217468	0	1.984035928	0	0	0	0	0	0	11.90421557	0	0	0	0	0	0	0	0	0	0	31	0	0	0	0	middle
939	hsa-miR-5090_R-1	CCGGGGCAGATTGGTGTAGGGT	up	inf	inf	0.363217468	0	1.152020861	0	0	0	0	0	0	6.912125168	0	0	0	0	0	0	0	0	0	0	18	0	0	0	0	low
940	hsa-miR-5587-3p	GCCCCGGGCAGTGTGATCATC	up	inf	inf	0.363217468	0	0.585373968	0	0	0	0	0	0	0	3.512243811	0	0	0	0	0	0	0	0	0	0	15	0	0	0	low
941	hsa-miR-5588-5p	ACTGGCATTAGTGGGACTTTT	up	inf	inf	0.363217468	0	0.702448762	0	0	0	0	0	0	0	4.214692573	0	0	0	0	0	0	0	0	0	0	18	0	0	0	low
942	hsa-miR-5590-3p_L-1R-1	ATAAAGTTCATGTATGGCA	up	inf	inf	0.363217468	0	0.544942487	0	0	0	0	0	0	0	0	3.269654922	0	0	0	0	0	0	0	0	0	0	9	0	0	low
943	hsa-miR-5680	GAGAAATGCTGGACTAATCTGC	up	inf	inf	0.363217468	0	0.546349037	0	0	0	0	0	0	0	3.278094223	0	0	0	0	0	0	0	0	0	0	14	0	0	0	low
944	hsa-mir-5685-p3_1ss3AT	GCTGGGCTGTGATGTAGA	up	inf	inf	0.363217468	0	1.836327464	0	0	0	0	0	11.01796478	0	0	0	0	0	0	0	0	0	0	9	0	0	0	0	0	middle
945	hsa-mir-5694-p3	AGGCTGAGAAGTCCCATGA	up	inf	inf	0.363217468	0	0.768013908	0	0	0	0	0	0	4.608083445	0	0	0	0	0	0	0	0	0	0	12	0	0	0	0	low
946	hsa-miR-5708_L+1_1ss8GC	CATGAGCCACTGTGCCTGACC	up	inf	inf	0.363217468	0	0.206428275	0	0	0	0	0	0	0	0	0	0	1.238569651	0	0	0	0	0	0	0	0	0	0	5	low
947	hsa-mir-6068-p5_1ss7GA	TCCGGCAGTGGCTTGTGG	up	inf	inf	0.363217468	0	1.224218309	0	0	0	0	0	7.345309854	0	0	0	0	0	0	0	0	0	0	6	0	0	0	0	0	low
948	hsa-mir-6124-p5_2ss9GA21TA	AAGGAAGGAGGAGGAGAAGGAG	up	inf	inf	0.363217468	0	0.520063106	0	0	0	0	0	0	0	0	0	3.120378636	0	0	0	0	0	0	0	0	0	0	21	0	low
949	hsa-miR-6125_R+1	GCGGAAGGCGGAGCGGCGGAT	up	inf	inf	0.363217468	0	0.619284825	0	0	0	0	0	0	0	0	0	0	3.715708952	0	0	0	0	0	0	0	0	0	0	15	low
950	hsa-miR-6499-5p	TCGGGCGCAAGAGCACTGCAGT	up	inf	inf	0.363217468	0	0.429274244	0	0	0	0	0	0	0	2.575645461	0	0	0	0	0	0	0	0	0	0	11	0	0	0	low
951	hsa-miR-6505-5p_R-1	TTGGAATAGGGGATATCTCAG	up	inf	inf	0.363217468	0	0.741473693	0	0	0	0	0	0	0	4.44884216	0	0	0	0	0	0	0	0	0	0	19	0	0	0	low
952	hsa-miR-6510-3p_R+1	CACCGACTCTGTCTCCTGCAGT	up	inf	inf	0.363217468	0	1.920034769	0	0	0	0	0	0	11.52020861	0	0	0	0	0	0	0	0	0	0	30	0	0	0	0	middle
953	hsa-miR-6511a-3p	CCTCACCATCCCTTCTGCCTGC	up	inf	inf	0.363217468	0	1.088019702	0	0	0	0	0	0	6.528118214	0	0	0	0	0	0	0	0	0	0	17	0	0	0	0	low
954	hsa-miR-6516-5p_R+1	TTTGCAGTAACAGGTGTGAGCAT	up	inf	inf	0.363217468	0	0.819523556	0	0	0	0	0	0	0	4.917141335	0	0	0	0	0	0	0	0	0	0	21	0	0	0	low
955	hsa-miR-6516-3p	ATCATGTATGATACTGCAAACA	up	inf	inf	0.363217468	0	0.585373968	0	0	0	0	0	0	0	3.512243811	0	0	0	0	0	0	0	0	0	0	15	0	0	0	low
956	hsa-miR-6724-5p_L-6R+1	CCGCGGCGGGCGTGGGGA	up	inf	inf	0.363217468	0	1.536027815	0	0	0	0	0	0	9.21616689	0	0	0	0	0	0	0	0	0	0	24	0	0	0	0	low
957	hsa-mir-6724-2-p3	GACCAGCGCGCCGTAGCTCCC	up	inf	inf	0.363217468	0	0.74314179	0	0	0	0	0	0	0	0	0	0	4.458850743	0	0	0	0	0	0	0	0	0	0	18	low
958	hsa-miR-6732-3p_R-2	TAACCCTGTCCTCTCCCTCCC	up	inf	inf	0.363217468	0	0.484393322	0	0	0	0	0	0	0	0	2.906359931	0	0	0	0	0	0	0	0	0	0	8	0	0	low
959	hsa-miR-6734-5p_L+2R-2	ACTTGAGGGGAGAATGAGGTGGA	up	inf	inf	0.363217468	0	1.238569651	0	0	0	0	0	0	0	0	0	0	7.431417904	0	0	0	0	0	0	0	0	0	0	30	low
960	hsa-miR-6735-5p_R-2	CAGGGCAGAGGGCACAGGAATCT	up	inf	inf	0.363217468	0	1.014648212	0	0	0	0	0	0	0	6.087889272	0	0	0	0	0	0	0	0	0	0	26	0	0	0	low
961	hsa-mir-6748-p5_1ss15GA	TGGTGTGTGGGTGGAAAG	up	inf	inf	0.363217468	0	0.666040817	0	0	0	0	0	0	0	0	3.996244905	0	0	0	0	0	0	0	0	0	0	11	0	0	low
962	hsa-miR-6761-5p_R+1	TCTGAGAGAGCTCGATGGCAGA	up	inf	inf	0.363217468	0	0.975623281	0	0	0	0	0	0	0	5.853739685	0	0	0	0	0	0	0	0	0	0	25	0	0	0	low
963	hsa-miR-6763-5p_L+1R+3	CCTGGGGAGTGGCTGGGGAGCAT	up	inf	inf	0.363217468	0	0.320005795	0	0	0	0	0	0	1.920034769	0	0	0	0	0	0	0	0	0	0	5	0	0	0	0	low
964	hsa-miR-6773-5p_R-3	TTGGGCCCAGGAGTAAACAG	up	inf	inf	0.363217468	0	0.351224381	0	0	0	0	0	0	0	2.107346287	0	0	0	0	0	0	0	0	0	0	9	0	0	0	low
965	hsa-miR-6793-5p_L+1	CTGTGGGTTCTGGGTTGGGGTGA	up	inf	inf	0.363217468	0	0.546349037	0	0	0	0	0	0	0	3.278094223	0	0	0	0	0	0	0	0	0	0	14	0	0	0	low
966	hsa-mir-6800-p5_1ss4GA	GGTAGGGCTGGGGCTGGC	up	inf	inf	0.363217468	0	1.428254694	0	0	0	0	0	8.569528163	0	0	0	0	0	0	0	0	0	0	7	0	0	0	0	0	low
967	hsa-miR-6810-5p_1ss23CA	ATGGGGACAGGGATCAGCATGGA	up	inf	inf	0.363217468	0	1.032141376	0	0	0	0	0	0	0	0	0	0	6.192848254	0	0	0	0	0	0	0	0	0	0	25	low
968	hsa-mir-6824-p5	GGGAGGTTGGGCCAGGGATGC	up	inf	inf	0.363217468	0	1.428254694	0	0	0	0	0	8.569528163	0	0	0	0	0	0	0	0	0	0	7	0	0	0	0	0	low
969	hsa-miR-6839-5p_L-2R+3	TGGATTGAAGAGACGACCCAAGC	up	inf	inf	0.363217468	0	0.66057048	0	0	0	0	0	0	0	0	0	0	3.963422882	0	0	0	0	0	0	0	0	0	0	16	low
970	hsa-miR-6852-5p_R+1	CCCTGGGGTTCTGAGGACATGA	up	inf	inf	0.363217468	0	0.6243989	0	0	0	0	0	0	0	3.746393398	0	0	0	0	0	0	0	0	0	0	16	0	0	0	low
971	hsa-miR-6876-5p	CAGGAAGGAGACAGGCAGTTCA	up	inf	inf	0.363217468	0	0.666040817	0	0	0	0	0	0	0	0	3.996244905	0	0	0	0	0	0	0	0	0	0	11	0	0	low
972	hsa-miR-6891-5p_L+1R+1	GTAAGGAGGGGGATGAGGGGT	up	inf	inf	0.363217468	0	0.819523556	0	0	0	0	0	0	0	4.917141335	0	0	0	0	0	0	0	0	0	0	21	0	0	0	low
973	hsa-mir-7108-p3_1ss4GT	CCCTCCCCGCCCCGCGCCC	up	inf	inf	0.363217468	0	0.866998756	0	0	0	0	0	0	0	0	0	0	5.201992533	0	0	0	0	0	0	0	0	0	0	21	low
974	hsa-miR-7113-5p_L-1R+4	CCAGGGAGACAGTGTGTGAGGCAT	up	inf	inf	0.363217468	0	1.428254694	0	0	0	0	0	8.569528163	0	0	0	0	0	0	0	0	0	0	7	0	0	0	0	0	low
975	hsa-miR-7161-5p_R-4_1ss17AG	TAAAGACTGTAGAGGCGAC	up	inf	inf	0.363217468	0	0.31219945	0	0	0	0	0	0	0	1.873196699	0	0	0	0	0	0	0	0	0	0	8	0	0	0	low
976	hsa-mir-7515-p3_1ss11AG	AGAGGCTGAGGAGGGAAGAT	up	inf	inf	0.363217468	0	1.428254694	0	0	0	0	0	8.569528163	0	0	0	0	0	0	0	0	0	0	7	0	0	0	0	0	low
977	hsa-mir-7703-p5_1ss3GA	GGAGAGGTGGATGAGTGG	up	inf	inf	0.363217468	0	1.428254694	0	0	0	0	0	8.569528163	0	0	0	0	0	0	0	0	0	0	7	0	0	0	0	0	low
978	hsa-miR-7705_R-1	AATAGCTCAGAATGTCAGTTCT	up	inf	inf	0.363217468	0	0.57799917	0	0	0	0	0	0	0	0	0	0	3.467995022	0	0	0	0	0	0	0	0	0	0	14	low
979	hsa-mir-8485-p5_1ss12GA	CGTGTGTGTGTATGTGTA	up	inf	inf	0.363217468	0	0.663423831	0	0	0	0	0	0	0	3.980542986	0	0	0	0	0	0	0	0	0	0	17	0	0	0	low
980	hsa-mir-9902-1-p3_1ss13GC	CTCTCTCTCTCTCTCTCT	up	inf	inf	0.363217468	0	0.512009272	0	0	0	0	0	0	3.07205563	0	0	0	0	0	0	0	0	0	0	8	0	0	0	0	low
981	hsa-miR-10394-3p_R-2	TGGGCGCGCCGGGACTGTGAG	up	inf	inf	0.363217468	0	2.652473003	0	0	0	0	0	15.91483802	0	0	0	0	0	0	0	0	0	0	13	0	0	0	0	0	middle
982	hsa-mir-12124-p5_1ss10CT	CCCCTTCCTTGGCCAGGC	up	inf	inf	0.363217468	0	0.195124656	0	0	0	0	0	0	0	1.170747937	0	0	0	0	0	0	0	0	0	0	5	0	0	0	low
983	hsa-mir-12125-p5_1ss1GT	TTTGCTTATGTCAGGTGAGAGG	up	inf	inf	0.363217468	0	0.576010431	0	0	0	0	0	0	3.456062584	0	0	0	0	0	0	0	0	0	0	9	0	0	0	0	low
2105	hsa-miR-362-5p	AATCCTTGGAACCTAGGTGTGAGT	up	1.576283695	0.65652721	0.366373054	69.50772198	109.5638889	47.61352275	192.3725561	107.5525311	0	0	145.6819788	71.4252934	60.64474313	178.0145458	85.43893883	116.1778332	13	75	51	0	0	119	186	259	490	575	469	middle
2107	hsa-miR-4488_L+2R-1	GGAGGGGGCGGGCTCCGGC	down	0.402096508	-1.314386287	0.36915275	868.0957653	349.0582761	1278.239957	64.12418537	204.5606963	2671.377851	122.1761368	1017.325415	190.4674491	232.9788395	73.74888324	264.4892367	315.3398331	349	25	97	395	27	831	496	995	203	1780	1273	high
2110	hsa-miR-34c-3p	AATCACTAACCACACGGCCAGG	down	-inf	-inf	0.373900966	2.564967415	0	0	12.82483707	0	0	0	0	0	0	0	0	0	0	5	0	0	0	0	0	0	0	0	0	middle
2111	hsa-miR-135b-3p_R+1	ATGTAGGGCTAAAAGCCATGGGT	down	-inf	-inf	0.373900966	2.564967415	0	0	12.82483707	0	0	0	0	0	0	0	0	0	0	5	0	0	0	0	0	0	0	0	0	middle
2112	hsa-miR-202-5p_R-1	TTCCTATGCATATACTTCTTT	down	-inf	-inf	0.373900966	21.7202021	0	0	0	0	0	108.6010105	0	0	0	0	0	0	0	0	0	0	24	0	0	0	0	0	0	middle
2113	hsa-miR-346	TGTCTGCCCGCATGCCTGCCTCT	down	-inf	-inf	0.373900966	2.108873158	0	0	0	10.54436579	0	0	0	0	0	0	0	0	0	0	5	0	0	0	0	0	0	0	0	middle
2114	hsa-miR-491-5p_R+1	AGTGGGGAACCCTTCCATGAGGA	down	-inf	-inf	0.373900966	2.564967415	0	0	12.82483707	0	0	0	0	0	0	0	0	0	0	5	0	0	0	0	0	0	0	0	0	middle
2115	hsa-mir-497-p3_1ss5CA	AGAGAGAGGGTGGGGGAG	down	-inf	-inf	0.373900966	2.564967415	0	0	12.82483707	0	0	0	0	0	0	0	0	0	0	5	0	0	0	0	0	0	0	0	0	middle
2116	hsa-miR-548ar-3p_1ss21CT	TAAAACTGCAGTTATTTTTGT	down	-inf	-inf	0.373900966	3.590954381	0	0	17.9547719	0	0	0	0	0	0	0	0	0	0	7	0	0	0	0	0	0	0	0	0	middle
2117	hsa-miR-548av-3p_L+1R-2	CAAAACTGCAGTTACTTTT	down	-inf	-inf	0.373900966	0.854989138	0	0	4.274945691	0	0	0	0	0	0	0	0	0	0	1.666666667	0	0	0	0	0	0	0	0	0	low
2118	hsa-miR-548q_L+2R-3	AGGCTGGTGCAAAAGTAATGG	down	-inf	-inf	0.373900966	2.564967415	0	0	12.82483707	0	0	0	0	0	0	0	0	0	0	5	0	0	0	0	0	0	0	0	0	middle
2119	hsa-miR-548y	AAAAGTAATCACTGTTTTTGCC	down	-inf	-inf	0.373900966	3.077960898	0	0	15.38980449	0	0	0	0	0	0	0	0	0	0	6	0	0	0	0	0	0	0	0	0	middle
2120	hsa-miR-548bc_R+1	AAAAACTGTGATTACTTTTGCA	down	-inf	-inf	0.373900966	10.82077104	0	0	0	0	54.10385521	0	0	0	0	0	0	0	0	0	0	8	0	0	0	0	0	0	0	middle
2121	hsa-miR-642a-3p_L+1R-1	AAGACACATTTGGAGAGGGAAC	down	-inf	-inf	0.373900966	14.87856018	0	0	0	0	74.39280091	0	0	0	0	0	0	0	0	0	0	11	0	0	0	0	0	0	0	middle
2122	hsa-mir-1972-2-p5	AGGCATGTGCCACCACACC	down	-inf	-inf	0.373900966	4.395094408	0	21.97547204	0	0	0	0	0	0	0	0	0	0	6	0	0	0	0	0	0	0	0	0	0	middle
2123	hsa-mir-3116-1-p3	GGTGCCTGGAACATAGTAGG	down	-inf	-inf	0.373900966	8.115578281	0	0	0	0	40.57789141	0	0	0	0	0	0	0	0	0	0	6	0	0	0	0	0	0	0	middle
2124	hsa-mir-3155a-p5	CCCACTGCAGAGCCTGGGGA	down	-inf	-inf	0.373900966	5.430050524	0	0	0	0	0	27.15025262	0	0	0	0	0	0	0	0	0	0	6	0	0	0	0	0	0	middle
2125	hsa-miR-3155b_R+3	CCAGGCTCTGCAGTGGGAACT	down	-inf	-inf	0.373900966	3.662578673	0	18.31289337	0	0	0	0	0	0	0	0	0	0	5	0	0	0	0	0	0	0	0	0	0	middle
2126	hsa-mir-3166-p5	GGCCAGTAGGCATTGTCTGC	down	-inf	-inf	0.373900966	4.525042104	0	0	0	0	0	22.62521052	0	0	0	0	0	0	0	0	0	0	5	0	0	0	0	0	0	middle
2127	hsa-mir-3168-p3_1ss13CT	TGCTGTGTGACCTTGGGC	down	-inf	-inf	0.373900966	8.115578281	0	0	0	0	40.57789141	0	0	0	0	0	0	0	0	0	0	6	0	0	0	0	0	0	0	middle
2128	hsa-mir-3942-p5_1ss10TC	AAGAAGCAACACTGTTAC	down	-inf	-inf	0.373900966	7.325157346	0	36.62578673	0	0	0	0	0	0	0	0	0	0	10	0	0	0	0	0	0	0	0	0	0	middle
2129	hsa-mir-4262-p5_1ss7AT	AGCTGCTGGTGCTGATGT	down	-inf	-inf	0.373900966	12.31184359	0	0	61.55921795	0	0	0	0	0	0	0	0	0	0	24	0	0	0	0	0	0	0	0	0	middle
2130	hsa-miR-4433b-5p_R+1	ATGTCCCACCCCCACTCCTGTT	down	-inf	-inf	0.373900966	4.525042104	0	0	0	0	0	22.62521052	0	0	0	0	0	0	0	0	0	0	5	0	0	0	0	0	0	middle
2131	hsa-miR-4436b-3p_L-1R-1	AGGGCAGGAAGAAGTGGACA	down	-inf	-inf	0.373900966	13.91779896	0	69.58899479	0	0	0	0	0	0	0	0	0	0	19	0	0	0	0	0	0	0	0	0	0	middle
2132	hsa-mir-4472-1-p3_1ss2GA	GAGGGGTGTTGTTTTTGTT	down	-inf	-inf	0.373900966	1.831289337	0	9.156446683	0	0	0	0	0	0	0	0	0	0	2.5	0	0	0	0	0	0	0	0	0	0	low
2133	hsa-mir-4538-p5_1ss3TG	GGGTGAGCTGGGCTGGGCT	down	-inf	-inf	0.373900966	8.115578281	0	0	0	0	40.57789141	0	0	0	0	0	0	0	0	0	0	6	0	0	0	0	0	0	0	middle
2134	hsa-miR-4670-5p_L-2R-1	GCGACCATGATGTAACTTC	down	-inf	-inf	0.373900966	3.662578673	0	18.31289337	0	0	0	0	0	0	0	0	0	0	5	0	0	0	0	0	0	0	0	0	0	middle
2135	hsa-mir-4672-p5_1ss9GA	GCTGTGTGACCTTGGACAAG	down	-inf	-inf	0.373900966	9.468174661	0	0	0	0	47.34087331	0	0	0	0	0	0	0	0	0	0	7	0	0	0	0	0	0	0	middle
2136	hsa-mir-4676-p5	AAAGAGCCAGTGGTGAGA	down	-inf	-inf	0.373900966	6.762981901	0	0	0	0	33.8149095	0	0	0	0	0	0	0	0	0	0	5	0	0	0	0	0	0	0	middle
2137	hsa-mir-4698-p3	AGGAAGACCCCAGAAGGAGC	down	-inf	-inf	0.373900966	10.82077104	0	0	0	0	54.10385521	0	0	0	0	0	0	0	0	0	0	8	0	0	0	0	0	0	0	middle
2138	hsa-miR-4703-3p	TGTAGTTGTATTGTATTGCCAC	down	-inf	-inf	0.373900966	2.108873158	0	0	0	10.54436579	0	0	0	0	0	0	0	0	0	0	5	0	0	0	0	0	0	0	0	middle
2139	hsa-mir-6132-p5_1ss2CT	CTGCTGTTGCTGCTGCTC	down	-inf	-inf	0.373900966	7.694902244	0	0	38.47451122	0	0	0	0	0	0	0	0	0	0	15	0	0	0	0	0	0	0	0	0	middle
2140	hsa-miR-6858-5p_R-4	GTGAGGAGGGGCTGGCAG	down	-inf	-inf	0.373900966	20.2889457	0	0	0	0	101.4447285	0	0	0	0	0	0	0	0	0	0	15	0	0	0	0	0	0	0	middle
2141	hsa-mir-7161-p3_1ss18AC	AGGGTGTGGGAGACTAGC	down	-inf	-inf	0.373900966	37.10534525	0	0	0	0	0	185.5267262	0	0	0	0	0	0	0	0	0	0	41	0	0	0	0	0	0	middle
2142	hsa-mir-12129-p3	GGGGGATGTACTGAACTGG	down	-inf	-inf	0.373900966	5.127610143	0	25.63805071	0	0	0	0	0	0	0	0	0	0	7	0	0	0	0	0	0	0	0	0	0	middle
2143	hsa-mir-12136-p3	GGGGTTCGATTCCTTCCT	down	-inf	-inf	0.373900966	8.115578281	0	0	0	0	40.57789141	0	0	0	0	0	0	0	0	0	0	6	0	0	0	0	0	0	0	middle
3046	hsa-miR-365b-3p	TAATGCCCCTAAAAATCCTTAT	down	0.57257466	-0.804464271	0.377291434	13.58646681	7.77926662	0	21.80222303	18.97985842	0	27.15025262	15.91483802	6.720121691	5.736664891	8.719079792	6.240757271	3.344138057	0	8.5	9	0	6	13	17.5	24.5	24	42	13.5	middle
3047	hsa-mir-3195-p5_1ss3CG	CGGCGCGCCGGGCCCGGG	down	0.092093035	-3.440764142	0.377358008	36.37987692	3.350333274	0	12.82483707	0	169.0745475	0	0	4.224076491	12.40992813	0	0	3.467995022	0	5	0	25	0	0	11	53	0	0	14	middle
3053	hsa-miR-655-3p_1ss21TC	ATAATACATGGTTAACCTCTCT	down	0.020123166	-5.634998894	0.382672634	13.57512631	0.273174519	0	0	0	0	67.87563155	0	0	1.639047112	0	0	0	0	0	0	0	15	0	0	7	0	0	0	middle
3062	hsa-miR-27a-5p	AGGGCTTAGCTGCTTGTGAGCA	down	0.474285512	-1.076172296	0.391133897	45.65064409	21.65143911	18.31289337	43.60444605	139.1856284	0	27.15025262	50.19295067	28.41651458	24.1174075	13.80520967	0	13.37655223	5	17	66	0	6	41	74	103	38	0	54	middle
3067	hsa-miR-584-5p_R-1	TTATGGTTTGCCTGGGACTGA	up	2.137255148	1.095759149	0.392117597	12.17336742	26.01759219	0	0	0	60.86683711	0	57.53826052	9.21616689	12.64407772	27.61041934	1.040126212	48.05650245	0	0	0	9	0	47	24	54	76	7	194	middle
3068	hsa-mir-7110-p3_1ss18AC	CTCTCTCTCTCTCTCCCCC	down	0.233037716	-2.101364626	0.392314021	11.63157771	2.710596307	47.61352275	0	10.54436579	0	0	0	8.832159937	0	0	0	7.431417904	13	0	5	0	0	0	23	0	0	0	30	middle
3075	hsa-miR-885-5p	TCCATTACACTACCCTGCCTCT	down	0.044765139	-4.481480518	0.39378038	6.762981901	0.302745826	0	0	0	33.8149095	0	0	0	0	1.816474957	0	0	0	0	0	5	0	0	0	0	5	0	0	middle
3080	hsa-mir-4472-2-p3_1ss8CT	CTTGCTCTGTCGCCCAGGC	down	0.483519341	-1.048354495	0.397392975	266.0358043	128.6334569	113.5399389	579.6826357	14.76211211	622.1943349	0	0	336.3900915	58.77154644	8.355784801	257.0597638	111.2235546	31	226	7	92	0	0	876	251	23	1730	449	middle
3086	hsa-miR-653-3p_R-1	TTCACTGGAGTTTGTTTCAAT	up	1.757098948	0.813195437	0.40011444	5.095615204	8.953500117	0	12.82483707	12.65323895	0	0	0	9.600173844	14.04897524	11.98873471	0	18.0831169	0	5	6	0	0	0	25	60	33	0	73	middle
3088	hsa-miR-550a-3-5p	AGTGCCTGAGGGAGTAAGAG	down	0.355196041	-1.493312592	0.400877371	5.889078477	2.091777363	9.156446683	0	0	20.2889457	0	0	2.688048676	3.200044361	0	3.566147012	3.096424127	2.5	0	0	3	0	0	7	13.66666667	0	24	12.5	middle
3089	hsa-miR-550a-5p_R-3	AGTGCCTGAGGGAGTAAGAG	down	0.355196041	-1.493312592	0.400877371	5.889078477	2.091777363	9.156446683	0	0	20.2889457	0	0	2.688048676	3.200044361	0	3.566147012	3.096424127	2.5	0	0	3	0	0	7	13.66666667	0	24	12.5	middle
3098	hsa-miR-224-3p_L-1	AAATGGTGCCCTAGTGACTACA	down	0.071033616	-3.815354255	0.40607683	4.395094408	0.31219945	21.97547204	0	0	0	0	0	0	1.873196699	0	0	0	6	0	0	0	0	0	0	8	0	0	0	middle
3099	hsa-miR-323a-3p	CACATTACACGGTCGACCTCT	down	0.390932069	-1.355010159	0.408037582	8.082357251	3.159652641	0	25.64967415	14.76211211	0	0	0	0	5.38544051	4.359539896	7.726651859	1.486283581	0	10	7	0	0	0	0	23	12	52	6	middle
3100	hsa-mir-3922-p3	TGTGGGACTTCTGGCCTTGACT	down	0.078862105	-3.664523963	0.409833872	8.115578281	0.64001159	0	0	0	40.57789141	0	0	3.840069538	0	0	0	0	0	0	0	6	0	0	10	0	0	0	0	middle
3102	hsa-miR-335-5p_R-2	TCAAGAGCAATAACGAAAAAT	down	0.831941169	-0.265446584	0.412143695	189.0309141	157.2625995	131.8528322	264.1916437	219.3228084	148.7856018	181.0016841	40.3992042	214.6598872	107.240511	204.8983751	185.1424657	191.2351541	36	103	104	22	40	33	559	458	564	1246	772	middle
3104	hsa-miR-181c-3p_L-1R+1	ACCATCGACCGTTGAGTGGACC	up	2.046222715	1.032963179	0.413361253	3.077960898	6.298193504	0	15.38980449	0	0	0	14.69061971	0	6.32203886	8.355784801	5.943578353	2.477139301	0	6	0	0	0	12	0	27	23	40	10	middle
3107	hsa-miR-876-3p_R-1	TGGTGGTTTACAAAGTAATTC	down	0.091033369	-3.457460709	0.415760714	8.145075787	0.741473693	0	0	0	0	40.72537893	0	0	4.44884216	0	0	0	0	0	0	0	9	0	0	19	0	0	0	middle
3110	hsa-miR-339-5p	TCCCTGTCCTCCAGGAGCTCACG	down	0.680436599	-0.555467352	0.418288567	97.02693733	66.02067928	205.1044057	143.6381752	50.61295579	54.10385521	31.67529473	48.96873236	49.15289008	39.57128027	88.28068289	110.6991468	59.45134324	56	56	24	8	7	40	128	169	243	745	240	middle
3111	hsa-miR-15b-5p	TAGCAGCACATCATGGTTTACA	down	0.37493077	-1.415303863	0.418623144	61.73545259	23.1465208	230.7424564	12.82483707	37.95971685	0	27.15025262	22.03592956	29.56853544	23.64910833	36.32949913	7.726651859	19.56940048	63	5	18	0	6	18	77	101	100	52	79	middle
3117	hsa-mir-10401-p5	GGAAGGCGTGGGGTGCGGACCC	down	0.107917894	-3.211993993	0.423113972	18.31289337	1.976288888	91.56446683	0	0	0	0	0	0	3.980542986	2.179769948	0	5.697420393	25	0	0	0	0	0	0	17	6	0	23	middle
3118	hsa-miR-381-3p	TATACAAGGGCAAGCTCTCTGT	down	0.536520944	-0.898293604	0.423170106	14.95060268	8.021311465	18.31289337	0	0	33.8149095	22.62521052	0	0	6.32203886	2.179769948	31.20378636	8.422273625	5	0	0	5	5	0	0	27	6	210	34	middle
3129	hsa-let-7d-3p	CTATACGACCTGCTGCCTTTCT	down	0.87662162	-0.189973835	0.429340052	161.5711622	141.636774	150.1657256	184.6776539	145.5122479	155.5485837	171.9515999	128.5429224	137.8584964	99.98187382	191.0931654	219.0208623	73.32332332	41	72	69	23	38	105	359	427	526	1474	296	middle
3132	hsa-miR-6827-5p	TGGGAGCCATGAGGGTCTGTGC	down	0.125875718	-2.989928083	0.433309555	4.525042104	0.569592926	0	0	0	0	22.62521052	0	0	0	0	3.417557553	0	0	0	0	0	5	0	0	0	0	23	0	middle
3135	hsa-mir-1303-p5	GCGAGACCTCAACTCTACAATTT	down	0.133188031	-2.908463659	0.437103201	4.395094408	0.585373968	21.97547204	0	0	0	0	0	0	3.512243811	0	0	0	6	0	0	0	0	0	0	15	0	0	0	middle
3140	hsa-mir-1304-p3_1ss7CT	TCGAACTCCTGGGCTCAAGT	down	0.300132171	-1.736330125	0.441661727	27.38923287	8.220389929	21.97547204	0	0	114.9706923	0	19.58749294	0	3.746393398	1.816474957	18.72227181	5.449706463	6	0	0	17	0	16	0	16	5	126	22	middle
3143	hsa-miR-1273c	GGCGACAAAACGAGACCCTGTC	down	0.149170594	-2.744964927	0.445529136	3.662578673	0.546349037	18.31289337	0	0	0	0	0	0	3.278094223	0	0	0	5	0	0	0	0	0	0	14	0	0	0	middle
3144	hsa-miR-99a-3p_R+1	CAAGCTCGCTTCTATGGGTCTGT	up	2.157966133	1.109672224	0.448349902	2.952422421	6.371227597	0	0	14.76211211	0	0	14.69061971	6.912125168	16.6246207	0	0	0	0	0	7	0	0	12	18	71	0	0	0	middle
3145	hsa-miR-10a-3p_R-1	CAAATTCGTATCTAGGGGAAT	up	1.263461279	0.337381451	0.448367132	85.42637572	107.9329179	73.25157346	148.7681101	132.859009	40.57789141	31.67529473	101.6101196	136.7064755	91.31833908	107.1720224	53.49220518	157.2983456	20	58	63	6	7	83	356	390	295	360	635	middle
3149	hsa-miR-138-5p_R+1	AGCTGGTGTTGTGAATCAGGCCGA	up	2.129195592	1.090308484	0.451412628	4.45001318	9.474948445	0	6.412418537	0	0	15.83764736	0	0	11.82455416	1.089884974	35.14140701	8.79384452	0	2.5	0	0	3.5	0	0	50.5	3	236.5	35.5	middle
3153	hsa-miR-890_R+1	TACTTGGAAAGGCATCAGTTGC	down	0.164489873	-2.603929331	0.453778844	3.795971685	0.6243989	0	0	18.97985842	0	0	0	0	3.746393398	0	0	0	0	0	9	0	0	0	0	16	0	0	0	middle
3155	hsa-miR-365b-5p_R+1	AGGGACTTTCAGGGGCAGCTGTG	down	0.165010661	-2.599368859	0.454062383	5.430050524	0.896016225	0	0	0	0	27.15025262	0	5.376097353	0	0	0	0	0	0	0	0	6	0	14	0	0	0	0	middle
3161	hsa-miR-374b-3p	CTTAGCAGGTTGTATTATCATT	up	1.748581299	0.806184875	0.459334582	5.699827539	9.966611844	0	17.9547719	10.54436579	0	0	9.793746472	16.12829206	3.278094223	26.88382936	0	3.715708952	0	7	5	0	0	8	42	14	74	0	15	middle
3163	hsa-miR-15a-5p	TAGCAGCACATAATGGTTTGTG	up	2.007408359	1.005334129	0.45950722	15.71593101	31.54829129	65.92641612	0	12.65323895	0	0	7.345309854	6.912125168	30.90774554	5.086129879	107.5787682	31.45966913	18	0	6	0	0	6	18	132	14	724	127	middle
3164	hsa-miR-944_R+1	AAATTATTGTACATCGGATGAGA	down	0.177046592	-2.497799022	0.460667345	4.103947864	0.726589983	0	20.51973932	0	0	0	0	0	0	4.359539896	0	0	0	8	0	0	0	0	0	0	12	0	0	middle
3165	hsa-mir-3908-p3_1ss5CG	TCTCGCTCTGTCGCCAGGC	down	0.371769881	-1.427518199	0.46110369	45.45818904	16.89998554	29.30062939	15.38980449	0	182.6005113	0	11.01796478	43.39278578	8.897684321	0	26.44892367	11.64255472	8	6	0	27	0	9	113	38	0	178	47	middle
3166	hsa-mir-1972-2-p3_1ss1GT	TCCAGGCACAGTGGCTCATGCC	up	2.326509243	1.218166919	0.463992237	9.378293622	21.8186868	23.80676138	23.08470673	0	0	0	0	26.88048676	7.844011178	0	93.46276961	2.724853232	6.5	9	0	0	0	0	70	33.5	0	629	11	middle
3167	hsa-mir-5708-p3_1ss1GT	TCCAGGCACAGTGGCTCATGCC	up	2.326509243	1.218166919	0.463992237	9.378293622	21.8186868	23.80676138	23.08470673	0	0	0	0	26.88048676	7.844011178	0	93.46276961	2.724853232	6.5	9	0	0	0	0	70	33.5	0	629	11	middle
3168	hsa-miR-19b-3p	TGTGCAAATCCATGCAAAACTGA	down	0.689833048	-0.535680848	0.464018377	54.03255262	37.27344048	36.62578673	121.8359522	50.61295579	0	61.0880684	37.95076758	7.296132121	39.92250465	29.2452468	60.55020448	48.67578727	10	47.5	24	0	13.5	31	19	170.5	80.5	407.5	196.5	middle
3171	hsa-miR-1260b_R-1	ATCCCACCACTGCCACCA	down	0.384907988	-1.377414485	0.467159469	14.06569692	5.413999093	54.9386801	15.38980449	0	0	0	0	8.448152983	13.11237689	0	2.748904988	8.174559695	15	6	0	0	0	0	22	56	0	18.5	33	middle
3174	hsa-miR-342-3p	TCTCACACAGAAATCGCACCCGT	up	1.177353545	0.235547609	0.47069394	134.4852987	158.3367431	91.56446683	159.0279797	103.3347847	142.0226199	176.476642	115.076521	141.6985659	279.1063082	134.4191468	184.1023395	95.61757704	25	62	49	21	39	94	369	1192	370	1239	386	middle
3178	hsa-mir-3976-p3_1ss16AT	AACCTTTACTGCAGCTTG	down	0.205665727	-2.281626696	0.473576709	3.077960898	0.633031066	0	15.38980449	0	0	0	0	0	0	1.816474957	0	1.981711441	0	6	0	0	0	0	0	0	5	0	8	middle
3179	hsa-miR-4454_L-2	ATCCGAGTCACGGCACCA	down	0.508881886	-0.974597256	0.474074714	11.2901764	5.745366263	29.30062939	0	0	0	27.15025262	9.793746472	3.07205563	11.00503061	3.269654922	2.377431341	4.954278603	8	0	0	0	6	8	8	47	9	16	20	middle
3186	hsa-miR-95-3p_R-1	TTCAACGGGTATTTATTGAGC	up	1.512716261	0.597141408	0.482053266	563.3310505	852.1600404	58.60125877	1741.612875	364.8350563	0	651.6060629	678.2169432	897.040244	859.3289857	1884.41112	226.4503353	567.512614	16	679	173	0	144	554	2336	3670	5187	1524	2291	high
3187	hsa-miR-93-5p	CAAAGTGCTGTTCGTGCAGGTAG	up	1.197920772	0.260532495	0.482899977	231.4131271	277.2145919	282.0185578	346.270601	158.1654869	121.7336742	248.8773157	139.5608872	446.2160803	280.2770561	174.7448908	252.1563116	370.3323256	77	135	75	18	55	114	1162	1197	481	1697	1495	middle
3189	hsa-mir-6512-p5_1ss9TG	AAGAAGGCGGAGGGAGAT	down	0.219889496	-2.185149404	0.485020689	4.639520948	1.020181924	0	0	23.19760474	0	0	6.121091545	0	0	0	0	0	0	0	11	0	0	5	0	0	0	0	0	middle
3190	hsa-let-7a-3p_R+1_1ss8AG	CTATACAGTCTACTGTCTTTCT	down	0.793111565	-0.334404275	0.48610039	20.32424067	16.11939032	10.98773602	23.5122013	29.87570307	23.67043665	13.57512631	21.83189318	19.58435464	3.395169017	31.12227092	2.080252424	18.70240173	3	9.166666667	14.16666667	3.5	3	17.83333333	51	14.5	85.66666667	14	75.5	middle
3191	hsa-let-7f-2-3p_1ss22CT	CTATACAGTCTACTGTCTTTCT	down	0.793111565	-0.334404275	0.48610039	20.32424067	16.11939032	10.98773602	23.5122013	29.87570307	23.67043665	13.57512631	21.83189318	19.58435464	3.395169017	31.12227092	2.080252424	18.70240173	3	9.166666667	14.16666667	3.5	3	17.83333333	51	14.5	85.66666667	14	75.5	middle
3193	hsa-mir-6803-p5_1ss19AC	GGGGGCTGGGCGTGGTGGC	down	0.225452471	-2.149104772	0.488278234	4.525042104	1.020181924	0	0	0	0	22.62521052	6.121091545	0	0	0	0	0	0	0	0	0	5	5	0	0	0	0	0	middle
3195	hsa-miR-590-3p	TAATTTTATGTATAAGCTAGT	down	0.228726996	-2.128301445	0.490205761	3.077960898	0.704012749	0	15.38980449	0	0	0	0	4.224076491	0	0	0	0	0	6	0	0	0	0	11	0	0	0	0	middle
3197	hsa-miR-4448_R-2_1ss6CG	GGCTCGTTGGTCTAGGGG	down	0.240157003	-2.057950218	0.491468621	9.52270455	2.286944183	47.61352275	0	0	0	0	0	4.608083445	2.575645461	0	6.537936189	0	13	0	0	0	0	0	12	11	0	44	0	middle
3201	hsa-miR-769-5p	TGAGACCTCTGGGTTCTGAGCT	down	0.70562271	-0.503031101	0.498514518	311.0420177	219.4783115	54.9386801	241.106937	111.7702774	541.0385521	606.3556419	411.3373518	79.48943943	155.475326	86.46420794	401.0429494	183.0605944	15	94	53	80	134	336	207	664	238	2699	739	middle
3203	hsa-miR-101-3p_R+1	TACAGTACTGTGATAACTGAAG	down	0.625676015	-0.676512294	0.500154437	694.2193914	434.3564226	278.3559792	2054.538899	580.9945551	138.641129	418.5663946	205.0565668	450.2481533	478.367607	339.6808169	607.5080024	525.2773889	76	801	275.5	20.5	92.5	167.5	1172.5	2043	935	4088.5	2120.5	high
3205	hsa-mir-548n-p5	AGGTTGGTGCAAAAGTAATTGTGG	down	0.267091602	-1.904593482	0.508171988	0.905008421	0.241720149	0	0	0	0	4.525042104	0	0	0.905378405	0.544942487	0	0	0	0	0	0	1	0	0	3.866666667	1.5	0	0	low
3206	hsa-miR-500b-5p_L+1R+6	TAATCCTTGCTACCTGGGTGAGAGA	up	1.81398938	0.85916601	0.509036098	2.197547204	3.986327291	10.98773602	0	0	0	0	4.284764082	1.344024338	4.097617779	0	9.361135907	4.830421638	3	0	0	0	0	3.5	3.5	17.5	0	63	19.5	middle
3209	hsa-miR-200a-3p_R+1	TAACACTGTCTGGTAACGATGTT	up	1.24047576	0.310893544	0.516803704	3622.05146	4493.067037	3391.547851	5832.735901	6284.442011	723.6390634	1877.892473	4989.913828	4724.437552	5586.340856	4099.420682	1448.672929	6109.616373	926	2274	2980	107	415	4076	12303	23858	11284	9749.5	24664	high
3215	hsa-miR-21-5p	TAGCTTATCAGACTGATGTTGA	up	1.258679953	0.331911492	0.521696769	5488.197601	6907.884297	3677.228988	12704.28361	4129.173644	1812.479149	5117.822619	4102.355554	9074.468324	8648.54916	4303.955762	7980.442655	7337.534325	1004	4953	1958	268	1131	3351	23631	36936	11847	53708	29621	high
3216	hsa-miR-485-3p	GTCATACACGGCTCTCCTCTCT	down	0.288634826	-1.792682714	0.522071433	4.395094408	1.268577309	21.97547204	0	0	0	0	0	0	0	1.816474957	5.794988895	0	6	0	0	0	0	0	0	0	5	39	0	middle
3217	hsa-miR-30b-5p	TGTAAACATCCTACACTCAGCT	up	1.196138237	0.25838413	0.522319294	1454.973241	1740.349127	1344.166373	1990.414714	2271.256391	818.32081	850.7079155	1481.304154	1547.932031	1679.242791	3140.927397	824.6714965	1768.016891	367	776	1077	121	188	1210	4031	7171.666667	8645.666667	5550	7137.333333	high
3220	hsa-miR-10b-5p_R-1	TACCCTGTAGAACCGAATTTGT	up	1.201556044	0.264903941	0.526985754	16973.43932	20394.5386	16455.96598	25562.46526	22892.87257	8588.987014	11366.90576	16303.52733	24062.06773	13299.81364	38524.70912	11323.11112	18854.00265	4493	9966	10855.5	1270	2512	13317.5	62660.5	56800.5	106042.5	76204	76112	high
3221	hsa-miR-301a-3p	CAGTGCAATAGTATTGTCAAAGC	down	0.305343082	-1.711496935	0.527989708	4.103947864	1.25311209	0	20.51973932	0	0	0	0	0	3.043944636	2.543064939	1.931662965	0	0	8	0	0	0	0	0	13	7	13	0	middle
3223	hsa-miR-425-3p	ATCGGGAATGTCGTGTCCGCCC	down	0.737764959	-0.438766826	0.531611068	41.84703198	30.87327384	18.31289337	71.81908761	42.17746316	0	76.92571576	6.121091545	38.01668842	44.25427202	53.40436373	22.13982937	21.30339799	5	28	20	0	17	5	99	189	147	149	86	middle
3226	hsa-miR-18a-5p	TAAGGTGCATCTAGTGCAGATAG	down	0.314715035	-1.66788199	0.537793526	5.129934829	1.614467621	0	25.64967415	0	0	0	7.345309854	0	2.341495874	0	0	0	0	10	0	0	0	6	0	10	0	0	0	middle
3227	hsa-miR-95-5p	TCAATAAATGTCTGTTGAATT	down	0.544607962	-0.876710021	0.540190637	5.186834056	2.824791124	0	15.38980449	10.54436579	0	0	0	0	3.043944636	3.996244905	0	9.908557206	0	6	5	0	0	0	0	13	11	0	40	middle
3228	hsa-miR-15b-3p_R-1	CGAATCATTATTTGCTGCTCT	down	0.518855468	-0.946595377	0.54145212	12.71266288	6.596034644	18.31289337	0	0	0	45.25042104	14.69061971	0	11.70747937	0	1.040126212	12.13798258	5	0	0	0	10	12	0	50	0	7	49	middle
3229	hsa-miR-34c-5p	AGGCAGTGTAGTTAGCTGATTGC	down	0.534784874	-0.902969436	0.547687411	149.3279578	79.85833302	0	94.90379434	23.19760474	121.7336742	506.8047156	15.91483802	1.920034769	7.258637209	70.84252331	376.5256887	6.688276114	0	37	11	18	112	13	5	31	195	2534	27	middle
3230	hsa-miR-3158-3p_1ss22CA	AAGGGCTTCCTCTCTGCAGGAA	down	0.523750898	-0.933047283	0.547974997	9.094531936	4.763269266	0	21.80222303	0	23.67043665	0	0	0	0	1.089884974	24.88873435	2.600996267	0	8.5	0	3.5	0	0	0	0	3	167.5	10.5	middle
3232	hsa-miR-942-5p	TCTTCTCTGTTTTGGCCATGTG	up	1.800621097	0.848494628	0.548733919	3.590954381	6.465948215	0	17.9547719	0	0	0	18.36327464	9.984180798	3.512243811	0	0	6.935990044	0	7	0	0	0	15	26	15	0	0	28	middle
3236	hsa-miR-548e-3p	AAAAACTGAGACTACTTTTGCA	down	0.336894524	-1.569631115	0.557813324	3.590954381	1.209772868	0	17.9547719	0	0	0	0	0	7.258637209	0	0	0	0	7	0	0	0	0	0	31	0	0	0	middle
3239	hsa-miR-888-5p_R+1	TACTCAAAAAGCTGTCAGTCAC	down	0.360456022	-1.472104842	0.559621288	15.18388674	5.473123417	0	0	75.91943369	0	0	6.121091545	12.67222947	9.83428267	0	0	4.211136813	0	0	36	0	0	5	33	42	0	0	17	middle
3240	hsa-miR-296-5p	AGGGCCCCCCCTCAATCCTGT	up	1.726952855	0.788228699	0.559803534	2.952422421	5.09869433	0	0	14.76211211	0	0	7.345309854	6.528118214	4.682991748	0	12.03574617	0	0	0	7	0	0	6	17	20	0	81	0	middle
3241	hsa-miR-20b-5p	CAAAGTGCTCATAGTGCAGGTAG	up	1.436625478	0.522684006	0.564863749	29.74418664	42.73125634	18.31289337	48.73438088	59.04844843	0	22.62521052	0	105.6019123	84.76215064	10.53555475	0	55.48792035	5	19	28	0	5	0	275	362	29	0	224	middle
3242	hsa-let-7b-3p_1ss22CT	CTATACAACCTACTGCCTTCCT	up	1.533961428	0.617262206	0.56700883	6.452157951	9.897361424	0	15.38980449	16.87098526	0	0	0	9.600173844	4.917141335	29.06359931	3.417557553	12.38569651	0	6	8	0	0	0	25	21	80	23	50	middle
3243	hsa-miR-184_1ss22TC	TGGACGGAGAACTGATAAGGGC	down	0.557928025	-0.841849074	0.569640018	26.33033418	14.69043135	36.62578673	0	0	0	95.02588418	28.15702111	9.984180798	10.53673143	22.52428946	12.48151454	4.458850743	10	0	0	0	21	23	26	45	62	84	18	middle
3244	hsa-miR-17-5p	CAAAGTGCTTACAGTGCAGGTAG	up	1.286140707	0.363048486	0.570043665	132.3138036	170.1741689	91.56446683	330.8807965	132.859009	20.2889457	85.97579997	98.54957388	286.0851806	210.3834043	74.47547322	110.7734416	240.7779401	25	129	63	3	19	80.5	745	898.5	205	745.5	972	middle
3245	hsa-miR-106a-5p_1ss1AC	CAAAGTGCTTACAGTGCAGGTAG	up	1.286140707	0.363048486	0.570043665	132.3138036	170.1741689	91.56446683	330.8807965	132.859009	20.2889457	85.97579997	98.54957388	286.0851806	210.3834043	74.47547322	110.7734416	240.7779401	25	129	63	3	19	80.5	745	898.5	205	745.5	972	middle
3247	hsa-miR-338-5p_R-1	AACAATATCCTGGTGCTGAGT	down	0.683475635	-0.549038185	0.570881616	11.34043116	7.750908396	25.63805071	20.51973932	10.54436579	0	0	19.58749294	0	9.365983496	9.082374783	8.469599154	0	7	8	5	0	0	16	0	40	25	57	0	middle
3249	hsa-miR-1260a_R+3_1ss9TG	ATCCCACCGCTGCCACCAAAA	up	1.774461848	0.827381556	0.57241352	3.662578673	6.499106122	18.31289337	0	0	0	0	0	19.58435464	11.70747937	4.359539896	3.343262824	0	5	0	0	0	0	0	51	50	12	22.5	0	middle
3254	hsa-miR-934	TGTCTACTACTGGAGACACTGG	down	0.742384399	-0.429761703	0.580338369	63.10070314	46.84497755	76.91415214	138.5082404	54.83070211	0	45.25042104	37.95076758	16.89630597	24.35155709	20.70781451	55.5724576	125.5909626	21	54	26	0	10	31	44	104	57	374	507	middle
3255	hsa-miR-130b-5p_R+1	ACTCTTTCCCTGTTGCACTACT	down	0.39043531	-1.356844562	0.58095315	10.86010105	4.240166922	0	0	0	0	54.30050524	15.91483802	1.920034769	2.107346287	0	1.783073506	3.715708952	0	0	0	0	12	13	5	9	0	12	15	middle
3258	hsa-miR-499a-5p	TTAAGACTTGCAGTGATGTTT	down	0.885001583	-0.176248059	0.585902382	45.3425859	40.12826031	40.28836541	51.29934829	37.95971685	33.8149095	63.35058945	67.332007	40.32073015	47.29821665	19.98122452	19.01945073	46.8179328	11	20	18	5	14	55	105	202	55	128	189	middle
3259	hsa-mir-3199-1-p5_1ss21GA	TTAGGAGAAAGTTTCTGGAAA	down	0.379261267	-1.398736053	0.586124407	4.734087331	1.795455961	0	0	0	23.67043665	0	0	0	0	0	10.77273577	0	0	0	0	3.5	0	0	0	0	0	72.5	0	middle
3260	hsa-mir-3199-2-p5_1ss21TA	TTAGGAGAAAGTTTCTGGAAA	down	0.379261267	-1.398736053	0.586124407	4.734087331	1.795455961	0	0	0	23.67043665	0	0	0	0	0	10.77273577	0	0	0	0	3.5	0	0	0	0	0	72.5	0	middle
3263	hsa-miR-20a-5p	TAAAGTGCTTATAGTGCAGGTAG	down	0.597587517	-0.742778083	0.590905875	336.9508285	201.357609	95.2270455	1256.834033	151.8388674	40.57789141	140.2763052	217.910859	351.3663627	145.4068938	124.610182	168.9462147	199.9051416	26	490	72	6	31	178	915	621	343	1137	807	high
3264	hsa-miR-451a_R-1	AAACCGTTACCATTACTGAGT	down	0.696499273	-0.521806248	0.592727607	529.3842037	368.715713	963.2581911	220.5871977	183.4719648	270.519276	1009.084389	198.3233661	65.28118214	369.0197497	53.04106873	1447.11274	79.51617158	263	86	87	40	223	162	170	1576	146	9739	321	high
3266	hsa-mir-7851-p5_1ss5TG	CTCAGCCTCCCAAGTAGC	up	1.678825756	0.747452502	0.595584542	477.8196749	802.1759768	29.30062939	2051.973932	145.5122479	162.3115656	0	3.672654927	1441.946111	150.0898855	4.359539896	2690.063563	522.9241065	8	800	69	24	0	3	3755	641	12	18104	2111	high
3267	hsa-miR-340-5p	TTATAAAGCAATGAGACTGATT	down	0.846149825	-0.241014955	0.597421289	134.9465071	114.1849634	106.2147815	223.1521651	191.9074574	108.2077104	45.25042104	83.24684501	122.4982183	104.6648656	196.9058853	57.65271003	120.1412561	29	87	91	16	10	68	319	447	542	388	485	middle
3268	hsa-miR-4466_L-1R+2	GGTGCGGGCCGGCGGGGTC	down	0.416414319	-1.263908415	0.599157625	5.860125877	2.440240329	29.30062939	0	0	0	0	7.345309854	7.296132121	0	0	0	0	8	0	0	0	0	6	19	0	0	0	0	middle
3269	hsa-miR-199b-5p_1ss17TC	CCCAGTGTTTAGACTACCTGTTC	up	1.75358139	0.810304393	0.599876012	9.050084207	15.87005924	0	0	0	0	45.25042104	6.121091545	7.296132121	14.98557359	8.719079792	58.0984784	0	0	0	0	0	10	5	19	64	24	391	0	middle
3270	hsa-miR-27a-3p_R+1_1ss19CT	TTCACAGTGGCTAAGTTCTGCT	up	1.137422391	0.18576811	0.603299366	792.4657745	901.3683157	694.0586586	1258.116517	872.0190509	287.4267308	850.7079155	822.0625945	846.0313203	890.8611302	1496.957012	588.8847903	763.4130471	189.5	490.5	413.5	42.5	188	671.5	2203.166667	3804.666667	4120.5	3963.166667	3081.833333	high
3272	hsa-miR-193b-5p	CGGGGTTTTGAGGGCGAGATGA	up	1.434244243	0.520290727	0.615254637	25.32106569	36.3165927	0	0	92.79041896	33.8149095	0	36.72654927	23.04041723	25.9906042	7.265899827	81.27843398	43.59765171	0	0	44	5	0	30	60	111	20	547	176	middle
3275	hsa-miR-450b-5p_R-1	TTTTGCAATATGTTCCTGAAT	up	1.364776837	0.448665066	0.618523715	120.1760219	164.013451	0	300.1011875	183.4719648	94.68174661	22.62521052	172.6147816	140.5465451	88.50854403	470.1037188	24.36867125	87.9384452	0	117	87	14	5	141	366	378	1294	164	355	middle
3276	hsa-miR-125b-1-3p_R-2	ACGGGTTAGGCTCTTGGGAG	down	0.464145813	-1.107349989	0.62503665	9.955092628	4.620614565	0	0	0	0	49.77546314	0	6.14411126	12.87822731	2.906359931	5.794988895	0	0	0	0	0	11	0	16	55	8	39	0	middle
3277	hsa-miR-130a-3p	CAGTGCAATGTTAAAAGGGCAT	down	0.729129166	-0.455753683	0.625387382	45.6167634	33.26051264	0	38.47451122	0	121.7336742	67.87563155	14.69061971	23.80843113	50.57631088	45.04857892	26.30033421	39.13880096	0	15	0	18	15	12	62	216	124	177	158	middle
3278	hsa-miR-374b-5p_R-1	ATATAATACAACCTGCTAAGT	down	0.697388381	-0.519965766	0.628064751	40.21251892	28.04374347	21.97547204	82.07895727	97.00816527	0	0	0	21.12038246	25.52230503	85.55597046	12.77869346	23.28510943	6	32	46	0	0	0	55	109	235.5	86	94	middle
3280	hsa-mir-10396b-p3	GCCGGGCCCCGGGCCCTCGACC	down	0.475180157	-1.073453503	0.633992468	3.662578673	1.740384709	18.31289337	0	0	0	0	3.060545773	0	0	2.179769948	0	5.201992533	5	0	0	0	0	2.5	0	0	6	0	21	middle
3281	hsa-mir-10396a-p3	GCCGGGCCCCGGGCCCTCGACC	down	0.475180157	-1.073453503	0.633992468	3.662578673	1.740384709	18.31289337	0	0	0	0	3.060545773	0	0	2.179769948	0	5.201992533	5	0	0	0	0	2.5	0	0	6	0	21	middle
3282	hsa-miR-181c-5p	AACATTCAACCTGTCGGTGAGT	down	0.559629183	-0.837456899	0.63757774	19.06776858	10.67087975	80.57673081	0	14.76211211	0	0	0	8.448152983	0	0	37.74172254	17.83540297	22	0	7	0	0	0	22	0	0	254	72	middle
3288	hsa-miR-20a-3p_R+1	ACTGCATTATGAGCACTTAAAGT	down	0.485754494	-1.041700752	0.644917168	2.564967415	1.245944449	0	12.82483707	0	0	0	0	0	3.512243811	0	0	3.963422882	0	5	0	0	0	0	0	15	0	0	16	middle
3290	hsa-miR-98-3p_1ss22CT	CTATACAACTTACTACTTTCCT	up	1.702753018	0.76786919	0.646090164	2.53064779	4.309068162	0	0	12.65323895	0	0	0	14.59226424	0	11.26214473	0	0	0	0	6	0	0	0	38	0	31	0	0	middle
3291	hsa-miR-664a-3p	TATTCATTTATCCCCAGCCTACA	down	0.629821527	-0.666985026	0.647967669	10.55610581	6.648462684	0	35.90954381	16.87098526	0	0	0	5.376097353	1.404897524	25.43064939	0	7.679131835	0	14	8	0	0	0	14	6	70	0	31	middle
3293	hsa-miR-92a-1-5p	AGGTTGGGATCGGTTGCAATGCT	down	0.68054641	-0.555234544	0.651231328	10.98072822	7.47289517	0	0	21.08873158	33.8149095	0	0	9.984180798	10.06843226	11.26214473	9.806904283	3.715708952	0	0	10	5	0	0	26	43	31	66	15	middle
3294	hsa-miR-7847-3p_L-3_1ss10CG	GGAGGAGGAGGAGGAGGC	down	0.497689319	-1.006682669	0.6520824	2.53064779	1.259476376	0	0	12.65323895	0	0	0	0	2.107346287	0	0.742947294	4.706564673	0	0	6	0	0	0	0	9	0	5	19	middle
3296	hsa-miR-760_R+2	CGGCTCTGGGTCTGTGGGGAGT	up	1.533187885	0.616534503	0.65337949	4.525042104	6.937739731	0	0	0	0	22.62521052	0	9.984180798	3.043944636	3.632949913	16.04766155	8.917701485	0	0	0	0	5	0	26	13	10	108	36	middle
3298	hsa-miR-487b-3p	AATCGTACAGGGTCATCCACTT	down	0.503537396	-0.989829167	0.663463703	3.374197053	1.699034399	0	0	16.87098526	0	0	0	0	1.873196699	0	8.321009695	0	0	0	8	0	0	0	0	8	0	56	0	middle
3300	hsa-miR-124-5p	CGTGTTCACAGCGGACCTTGAT	down	0.711790212	-0.490476	0.665581652	15.70600521	11.17938078	20.75461248	15.38980449	7.029577194	24.7976003	10.55843158	3.672654927	0.768013908	0.546349037	2.058671618	58.29659768	1.733997511	5.666666667	6	3.333333333	3.666666667	2.333333333	3	2	2.333333333	5.666666667	392.3333333	7	middle
3301	hsa-miR-34a-5p	TGGCAGTGTCTTAGCTGGTTGT	down	0.717596349	-0.478755545	0.668465026	31.60816697	22.68190522	21.97547204	41.03947864	0	0	95.02588418	0	7.680139075	26.69305296	6.902604835	35.3642912	59.45134324	6	16	0	0	21	0	20	114	19	238	240	middle
3302	hsa-miR-138-5p	AGCTGGTGTTGTGAATCAGGCCG	up	1.413183933	0.498949252	0.668491398	4.45001318	6.288687129	0	6.412418537	0	0	15.83764736	0	0	9.248908702	1.089884974	14.6360617	12.7572674	0	2.5	0	0	3.5	0	0	39.5	3	98.5	51.5	middle
3305	hsa-miR-200b-3p	TAATACTGCCTGGTAATGATGA	up	1.159860073	0.213950767	0.681750967	4929.285941	5717.281952	4292.542205	9258.249883	7734.292307	831.8467738	2529.498536	4891.976363	5966.892051	7446.308103	5457.962302	1880.473896	8660.078998	1172	3609.5	3667.5	123	559	3996	15538.5	31801.5	15023.5	12655.5	34960	high
3306	hsa-miR-30d-5p_R+2	TGTAAACATCCCCGACTGGAAGCT	up	1.115331474	0.15747254	0.682962968	7647.282796	8529.255194	6596.304191	11896.31887	10065.65158	5234.547991	4443.591346	5009.501321	9074.276321	5210.647843	15279.09745	8146.417081	8455.591149	1801	4638	4773	774	982	4092	23630.5	22253.5	42057	54825	34134.5	high
3307	hsa-miR-4662a-5p	TTAGCCAATTGTCCATCTTTAG	down	0.706613646	-0.501006484	0.683003656	10.28244926	7.265718965	0	28.21464156	23.19760474	0	0	6.121091545	11.13620166	19.43441575	6.902604835	0	0	0	11	11	0	0	5	29	83	19	0	0	middle
3308	hsa-miR-144-5p_R-2	GGATATCATCATATACTGTA	down	0.532097405	-0.910237728	0.686115449	5.430050524	2.889315792	0	0	0	0	27.15025262	0	0	0	2.179769948	15.1561248	0	0	0	0	0	6	0	0	0	6	102	0	middle
3309	hsa-miR-32-5p_R-1	TATTGCACATTACTAAGTTGC	down	0.76367399	-0.388971208	0.686889659	18.0950295	13.81870337	0	35.90954381	27.41535106	0	27.15025262	6.121091545	13.82425034	10.53673143	47.22834887	0.742947294	4.458850743	0	14	13	0	6	5	36	45	130	5	18	middle
3310	hsa-miR-598-3p	TACGTCATCGTTGTCATCGTCA	up	1.257196963	0.330210692	0.686909841	33.0766698	41.58388883	21.97547204	94.90379434	48.50408264	0	0	77.12575347	9.984180798	48.70311418	50.1347088	29.86648123	33.6890945	6	37	23	0	0	63	26	208	138	201	136	middle
3312	hsa-miR-106a-3p_L+1R-1	ACTGCAATGTAAGCACTTCTTA	down	0.562872288	-0.829120474	0.691552924	2.564967415	1.443749077	0	12.82483707	0	0	0	0	2.688048676	2.341495874	3.632949913	0	0	0	5	0	0	0	0	7	10	10	0	0	middle
3313	hsa-mir-1268a-p3_1ss6GA	CCTGTAGTCCCAGCTACT	up	1.418950494	0.504824256	0.693641635	6.925742198	9.827285314	21.97547204	0	12.65323895	0	0	0	13.05623643	1.873196699	0	35.3642912	8.669987555	6	0	6	0	0	0	34	8	0	238	35	middle
3314	hsa-mir-4484-p3_1ss3GA	GGAAAAAAGGCGGGAGAA	up	1.216208063	0.282390059	0.693977489	67.07512717	81.57731051	131.8528322	12.82483707	14.76211211	148.7856018	27.15025262	133.4397957	75.64936989	79.37671013	1.816474957	114.7110622	84.47045018	36	5	7	22	6	109	197	339	5	772	341	middle
3317	hsa-miR-129-1-3p	AAGCCCTTACCCCAAAAAGTAT	down	0.654851466	-0.610760385	0.70044048	10.04699187	6.579287353	0	23.08470673	0	0	27.15025262	0	0	0	2.179769948	37.29595417	0	0	9	0	0	6	0	0	0	6	251	0	middle
3320	hsa-mir-3135b-p3_1ss14GA	TCACTGCAGCCTCAAACTCC	down	0.749234675	-0.416510425	0.701011648	29.12181736	21.81907537	0	84.64392469	0	33.8149095	27.15025262	3.060545773	33.02459802	8.195235559	0	62.11039379	24.52367908	0	33	0	5	6	2.5	86	35	0	418	99	middle
3321	hsa-miR-365a-5p_L-1R-3	GGGACTTTTGGGGGCAGAT	up	1.6990308	0.764712006	0.707820056	3.077960898	5.229550367	0	15.38980449	0	0	0	28.15702111	0	0	0	0	3.220281092	0	6	0	0	0	23	0	0	0	0	13	middle
3322	hsa-miR-122-3p_R-1	AACGCCATTATCACACTAAAT	up	1.800570059	0.848453735	0.708093313	4.525042104	8.147655326	0	0	0	0	22.62521052	0	0	0	0	48.88593196	0	0	0	0	0	5	0	0	0	0	329	0	middle
3323	hsa-miR-140-5p	CAGTGGTTTTACCCTATGGTAG	up	1.29434571	0.372223002	0.708712083	37.40246461	48.41171962	0	138.5082404	48.50408264	0	0	22.03592956	52.99295962	55.96175139	46.1384639	48.44016358	64.9010497	0	54	23	0	0	18	138	239	127	326	262	middle
3324	hsa-miR-495-3p	AAACAAACATGGTGCACTTCTT	down	0.590138968	-0.760873369	0.709367138	4.525042104	2.670403679	0	0	0	0	22.62521052	0	3.07205563	3.043944636	2.179769948	7.726651859	0	0	0	0	0	5	0	8	13	6	52	0	middle
3325	hsa-mir-4472-2-p5	TTGTTTTTGTTTTTGAGA	down	0.559179002	-0.838617909	0.712897229	1.831289337	1.024018543	9.156446683	0	0	0	0	0	6.14411126	0	0	0	0	2.5	0	0	0	0	0	16	0	0	0	0	low
3327	hsa-miR-215-5p_L-1R+2_1ss20AC	TGACCTATGAATTGACAGCCAA	down	0.646310225	-0.62970128	0.715432533	116.4812956	75.28305235	534.7364863	20.51973932	0	0	27.15025262	59.37458799	83.71351592	98.92820067	33.24149171	117.9800303	58.46048751	146	8	0	0	6	48.5	218	422.5	91.5	794	236	middle
3328	hsa-miR-106b-5p	TAAAGTGCTGACAGTGCAGAT	down	0.769655347	-0.377715547	0.717671578	45.57371602	35.0760542	25.63805071	141.0732078	61.15732158	0	0	13.4664014	42.24076491	30.43944636	28.70030432	31.20378636	64.40562184	7	55	29	0	0	11	110	130	79	210	260	middle
3329	hsa-miR-224-5p_L-1R-2	CAAGTCACTAGTGGTTCCGTTT	up	1.266892625	0.341294255	0.718780031	40.03905631	50.72518516	18.31289337	133.3783056	48.50408264	0	0	31.82967603	77.95341161	90.38174073	42.50551399	0	61.68076861	5	52	23	0	0	26	203	386	117	0	249	middle
3330	hsa-miR-199a-5p_R-1	CCCAGTGTTCAGACTACCTGTT	up	1.131862683	0.178698942	0.720104028	130.5353047	147.7480402	108.0460709	52.581832	85.4093629	169.0745475	237.5647104	216.0745315	94.84971758	167.0657306	21.97934698	242.3494074	144.1695073	29.5	20.5	40.5	25	52.5	176.5	247	713.5	60.5	1631	582	middle
3331	hsa-miR-708-5p_R-1	AAGGAGCTTACAATCTAGCTGG	down	0.87494692	-0.192732599	0.727456394	36.01543698	31.51159564	29.30062939	35.90954381	35.85084369	47.34087331	31.67529473	0	23.04041723	27.62965131	15.25838964	84.99317045	38.14794524	8	14	17	7	7	0	60	118	42	572	154	middle
3332	hsa-miR-504-5p	AGACCCTGGTCTGCACTCTATC	up	1.244794284	0.315907341	0.727911152	17.52584774	21.8160751	40.28836541	0	0	47.34087331	0	24.48436618	13.82425034	24.58570668	38.87256407	6.092167812	23.0373955	11	0	0	7	0	20	36	105	107	41	93	middle
3334	hsa-mir-10401-p3	CGGCCCGACCTCGCCGTCCCGC	down	0.746709451	-0.421381104	0.733680566	29.41643979	21.96553361	65.92641612	0	0	81.15578281	0	71.00466192	23.42442418	4.682991748	11.62543972	0	21.05568406	18	0	0	12	0	58	61	20	32	0	85	middle
3335	hsa-miR-374a-3p	CTTATCAGATTGTATTGTAATT	down	0.833537815	-0.262680443	0.740202146	55.36034027	46.14493708	32.96320806	94.90379434	67.48394106	0	81.45075787	46.52029574	30.33654935	28.80039925	144.9547015	0	26.2576766	9	37	32	0	18	38	79	123	399	0	106	middle
3340	hsa-mir-558-p5	TGTGTGTGTGTGTGTGTG	up	1.262087631	0.335812085	0.757590954	8.938086775	11.28064876	29.30062939	15.38980449	0	0	0	0	19.58435464	3.980542986	2.906359931	26.59751313	14.61512188	8	6	0	0	0	0	51	17	8	179	59	middle
3341	hsa-miR-548o-5p_1ss21CA	AAAAGTAATTGCGGTTTTTGAC	down	0.672710734	-0.571941817	0.762595934	1.880976104	1.265352815	0	9.404880521	0	0	0	2.448436618	1.792032451	0.819523556	1.210983304	0	1.321140961	0	3.666666667	0	0	0	2	4.666666667	3.5	3.333333333	0	5.333333333	low
3345	hsa-miR-582-3p_1ss22CA	TAACTGGTTGAACAACTGAACA	down	0.659058088	-0.601522467	0.769646968	2.53064779	1.667843894	0	0	12.65323895	0	0	0	0	2.575645461	0	0	7.431417904	0	0	6	0	0	0	0	11	0	0	30	middle
3346	hsa-miR-320b_R-2	AAAAGCTGGGTTGAGAGGGC	down	0.865985552	-0.207585139	0.780929356	120.2662282	104.148816	46.5670717	42.44410365	31.23140725	275.3499774	205.738581	196.720223	70.30070161	57.34490645	69.79761772	147.0292695	83.70017782	12.71428571	16.54761905	14.80952381	40.71428571	45.46666667	160.6904762	183.0714286	244.9071429	192.1238095	989.5	337.8904762	middle
3347	hsa-miR-671-5p_R+1	AGGAAGCCCTGGAGGGGCTGGAGG	down	0.680959622	-0.55435884	0.784134073	16.92878494	11.52781899	0	84.64392469	0	0	0	0	0	7.024487622	9.082374783	1.040126212	52.01992533	0	33	0	0	0	0	0	30	25	7	210	middle
3348	hsa-miR-26a-2-3p	CCTATTCTTGATTACTTGTTTC	down	0.660367265	-0.598659488	0.784880369	2.108873158	1.3926308	0	0	10.54436579	0	0	0	0	0	8.355784801	0	0	0	0	5	0	0	0	0	0	23	0	0	middle
3349	hsa-miR-548ae-5p_L+3R-1	TGCAAAAGTAATTGTGGTTTTT	up	1.342439751	0.424857341	0.792621224	0.905008421	1.214919279	0	0	0	0	4.525042104	0	0	3.059554609	0.544942487	3.685018579	0	0	0	0	0	1	0	0	13.06666667	1.5	24.8	0	low
3350	hsa-miR-133a-5p	AGCTGGTAAAATGGAACCAAAT	up	1.377554682	0.462109588	0.793461436	2.197547204	3.027241441	10.98773602	0	0	0	0	13.4664014	1.536027815	3.16101943	0	0	0	3	0	0	0	0	11	4	13.5	0	0	0	middle
3352	hsa-miR-183-3p_L-1	TGAATTACCGAAGGGCCATAA	up	1.34650349	0.429217969	0.7971057	29.08749774	39.16641723	0	71.81908761	12.65323895	33.8149095	27.15025262	0	0	3.278094223	11.26214473	216.4948415	3.963422882	0	28	6	5	6	0	0	14	31	1457	16	middle
3354	hsa-miR-660-5p_R+1	TACCCATTGCATATCGGAGTTGT	up	1.103185833	0.141675835	0.799040413	485.9760993	536.1219479	487.1229635	928.5182041	795.0451806	74.39280091	144.8013473	381.9561124	349.062321	618.8573595	733.8558825	355.4259855	777.5740267	133	362	377	11	32	312	909	2643	2020	2392	3139	high
3355	hsa-miR-494-3p_R+1	TGAAACATACACGGGAAACCTCT	down	0.724844019	-0.464257524	0.806360678	9.050084207	6.559899408	0	0	0	0	45.25042104	0	6.14411126	1.873196699	22.52428946	3.120378636	5.697420393	0	0	0	0	10	0	16	8	62	21	23	middle
3356	hsa-miR-148a-5p	AAAGTTCTGAGACACTCCGACT	down	0.85567686	-0.224862019	0.806481964	33.16044831	28.37462827	80.57673081	12.82483707	0	0	72.40067366	46.52029574	32.25658412	26.69305296	26.88382936	23.77431341	14.11969402	22	5	0	0	16	38	84	114	74	160	57	middle
3358	hsa-miR-135b-5p_R-1	TATGGCTTTTCATTCCTATGTG	down	0.881023032	-0.182748359	0.807138563	10.11473662	8.911315933	18.31289337	15.38980449	16.87098526	0	0	12.24218309	0	9.83428267	8.355784801	6.686525648	16.34911939	5	6	8	0	0	10	0	42	23	45	66	middle
3360	hsa-miR-133a-3p_L-1R+1	TTGGTCCCCTTCAACCAGCTGT	up	1.168527467	0.224691646	0.818103606	103.0287006	120.3918665	95.2270455	92.33882693	61.15732158	153.2942564	113.1260526	465.8150666	73.02532237	87.53292075	15.07674214	71.57058934	9.330558036	26	36	29	22.66666667	25	380.5	190.1666667	373.8333333	41.5	481.6666667	37.66666667	middle
3363	hsa-miR-543	AAACATTCGCGGTGCACTTCTT	down	0.817374145	-0.290931485	0.822510525	7.960698314	6.50686898	0	0	12.65323895	0	27.15025262	0	0	1.873196699	7.992489809	19.76239802	9.413129346	0	0	6	0	6	0	0	8	22	133	38	middle
3365	hsa-miR-221-5p	ACCTGGCATACAATGTAGATTT	down	0.868486109	-0.203425322	0.825306017	16.50999535	14.33870161	18.31289337	41.03947864	23.19760474	0	0	36.72654927	18.43233378	4.682991748	20.34451951	0.891536753	4.954278603	5	16	11	0	0	30	48	20	56	6	20	middle
3366	hsa-miR-16-5p	TAGCAGCACGTAAATATTGGCG	down	0.907506977	-0.14001936	0.825925687	133.5603626	121.206961	157.4908829	91.05634322	93.84485553	108.2077104	217.202021	56.31404221	91.00964804	105.0160899	68.84440086	359.7350798	46.32250494	43	35.5	44.5	16	48	46	237	448.5	189.5	2421	187	middle
3367	hsa-miR-92a-3p	TATTGCACTTGTCCCGGCCTGT	up	1.034238437	0.048568828	0.827202035	464.6824379	480.5924382	461.4849128	443.7393627	402.7947732	442.9753145	572.4178261	372.1623659	748.2375494	432.7084375	564.5604165	458.1013016	307.7845582	126	173	191	65.5	126.5	304	1948.5	1848	1554	3083	1242.5	middle
3369	hsa-miR-150-5p	TCTCCCAACCCTTGTACCAGTG	down	0.746080366	-0.422597053	0.834986575	16.29015157	12.15376224	0	0	0	0	81.45075787	0	8.448152983	2.809795049	0	61.66462542	0	0	0	0	0	18	0	22	12	0	415	0	middle
3370	hsa-miR-4742-5p	TCAGGCAAAGGGATATTTACAGA	down	0.767057277	-0.382593785	0.839908726	2.108873158	1.617626503	0	0	10.54436579	0	0	6.121091545	0	1.404897524	2.179769948	0	0	0	0	5	0	0	5	0	6	6	0	0	middle
3371	hsa-miR-30e-5p_R+2	TGTAAACATCCTTGACTGGAAGCT	down	0.938242241	-0.091967641	0.8459728	4148.13241	3891.953046	3028.952563	6904.89228	5786.747946	1372.885326	3647.183936	3964.018885	3032.31091	2738.379425	7807.572659	2461.087207	3348.349194	827	2692	2744	203	806	3238	7896.5	11695	21491	16563	13517	high
3373	hsa-miR-452-5p_R+1	AACTGTTTGCAGAGGAAACTGAG	down	0.851316017	-0.23223332	0.85256237	15.59802094	13.27884506	0	28.21464156	0	0	49.77546314	0	8.064146029	9.83428267	0	19.91098748	41.86365419	0	11	0	0	11	0	21	42	0	134	169	middle
3374	hsa-miR-200c-3p	TAATACTGCCGGGTAATGATGGA	down	0.930547205	-0.103848757	0.853752112	2176.570548	2025.401641	1508.982413	4056.495966	3377.360363	338.149095	1601.864905	1482.528372	2391.019298	3260.41593	2182.857955	352.008428	2483.579864	412	1581.5	1601.5	50	354	1211	6226.5	13924.5	6008.5	2369	10026	high
3376	hsa-miR-1249-3p	ACGCCCTTCCCCCCCTTCTTCA	up	1.293777806	0.371589869	0.861478442	2.564967415	3.318497914	0	12.82483707	0	0	0	0	0	0	0	19.91098748	0	0	5	0	0	0	0	0	0	0	134	0	middle
3378	hsa-miR-1307-5p_R+1	TCGACCGGACCTCGACCGGCTC	down	0.814770391	-0.295534542	0.868584885	10.86010105	8.848488777	0	0	0	0	54.30050524	0	17.66431987	5.619590097	23.61417444	0	6.192848254	0	0	0	0	12	0	46	24	65	0	25	middle
3379	hsa-miR-149-5p	TCTGGCTCCGTGTCTTCACTCCC	down	0.964275777	-0.052482287	0.874078229	140.5672649	135.5456086	146.5031469	125.6834033	73.81056053	175.8375294	181.0016841	77.12575347	125.5702739	188.0221187	211.07439	65.08218297	146.3989327	40	49	35	26	40	63	327	803	581	438	591	middle
3380	hsa-let-7a-3p_R+1	CTATACAATCTACTGTCTTTCT	down	0.926223561	-0.110567639	0.87615973	82.20810125	76.14308026	10.98773602	151.760572	150.0814731	57.48534616	40.72537893	68.35218892	56.06501525	20.01978972	188.6106497	81.5756129	42.23522509	3	59.16666667	71.16666667	8.5	9	55.83333333	146	85.5	519.1666667	549	170.5	middle
3382	hsa-miR-324-3p_L-3R+1	ACTGCCCCAGGTGCTGCTGGT	up	1.102853547	0.141241222	0.880857614	13.46402939	14.84885257	43.95094408	12.82483707	10.54436579	0	0	13.4664014	19.58435464	17.09291988	9.082374783	27.63763934	2.229425371	12	5	5	0	0	11	51	73	25	186	9	middle
3383	hsa-miR-190b-5p	TGATATGTTTGATATTGGGTTG	down	0.88981648	-0.168420277	0.881131487	25.52915082	22.71625911	0	20.51973932	16.87098526	67.62981901	22.62521052	22.03592956	9.600173844	11.94162896	0	92.71982231	0	0	8	8	10	5	18	25	51	0	624	0	middle
3384	hsa-miR-335-3p	TTTTTCATTATTGCTCCTGACC	down	0.839019537	-0.25322369	0.884171658	8.115578281	6.809128733	0	0	0	40.57789141	0	0	15.36027815	0	7.265899827	12.03574617	6.192848254	0	0	0	6	0	0	40	0	20	81	25	middle
3385	hsa-miR-1290_R-1_1ss13TG	TGGATTTTTGGAGCAGGG	up	1.092103136	0.127109108	0.884195668	42.35245185	46.25324548	0	21.80222303	10.54436579	125.1151652	54.30050524	75.289426	73.53733165	9.83428267	39.78080155	66.56807756	12.50955347	0	8.5	5	18.5	12	61.5	191.5	42	109.5	448	50.5	middle
3387	hsa-mir-3614-p5	GGATCTGAAGGCTGCCCCT	up	1.193210391	0.254848447	0.903971337	3.077960898	3.672654927	0	15.38980449	0	0	0	22.03592956	0	0	0	0	0	0	6	0	0	0	18	0	0	0	0	0	middle
3388	hsa-miR-200a-5p	CATCTTACCGGACAGTGCTGGA	up	1.062380085	0.087300007	0.912084887	24.01058259	25.50836477	0	46.16941347	40.06859	33.8149095	0	29.38123942	15.7442851	28.09795049	62.48673851	0	17.33997511	0	18	19	5	0	24	41	120	172	0	70	middle
3389	hsa-miR-582-5p_R-1	TTACAGTTGTTCAACCAGTTAC	down	0.9129285	-0.131426221	0.914948952	16.58648913	15.14227864	0	51.29934829	31.63309737	0	0	0	0	30.90774554	16.34827461	0	43.59765171	0	20	15	0	0	0	0	132	45	0	176	middle
3390	hsa-miR-10a-5p_R-1	TACCCTGTAGATCCGAATTTGT	down	0.974817249	-0.036796315	0.917488466	9736.290596	9491.104016	9724.146377	15384.67455	12042.72017	3706.114082	7823.797797	9300.998603	11009.67137	6213.744675	13652.44413	6517.876612	10251.88871	2655	5998	5710.5	548	1729	7597.5	28670.5	26537.5	37579.5	43865	41386	high
3393	hsa-miR-3130-3p	GCTGCACCGGAGACTGGGTAA	up	1.12209574	0.166195775	0.925052752	2.262521052	2.538765234	0	0	0	0	11.31260526	3.672654927	0	0	0.908237478	0	10.651699	0	0	0	0	2.5	3	0	0	2.5	0	43	middle
3395	hsa-miR-127-3p	TCGGATCCGTCTGAGCTTGGCT	down	0.945392416	-0.081014804	0.932207945	304.8277837	288.1818748	249.0553498	184.6776539	189.7985842	588.3794254	312.2279052	40.3992042	65.66518909	105.6014639	87.9173879	1133.737571	295.7704326	68	72	90	87	69	33	171	451	242	7630	1194	high
3396	hsa-miR-29c-3p_R-1	TAGCACCATTTGAAATCGGTT	down	0.980315095	-0.028682557	0.935815169	70.18668113	68.805063	51.27610143	80.79647356	68.53837764	37.19640046	113.1260526	80.18629924	22.4644068	81.05478217	57.85472737	91.75399083	79.51617158	14	31.5	32.5	5.5	25	65.5	58.5	346.1666667	159.25	617.5	321	middle
3397	hsa-let-7i-3p	CTGCGCAAGCTACTGCCTTGCT	up	1.090419546	0.124883329	0.937067417	4.103947864	4.475024968	0	20.51973932	0	0	0	0	6.14411126	7.726936384	10.89884974	2.080252424	0	0	8	0	0	0	0	16	33	30	14	0	middle
3398	hsa-miR-1270	CTGGAGATATGGAAGAGCTGTGT	down	0.924408992	-0.113396801	0.946464485	6.335058945	5.856185456	0	0	0	0	31.67529473	0	15.7442851	9.600133083	5.086129879	0	4.706564673	0	0	0	0	7	0	41	41	14	0	19	middle
3399	hsa-mir-8078-p5_1ss9CT	CCCTCCACTGGGCTGACCGGCC	down	0.918311451	-0.122944559	0.947231618	2.564967415	2.35543895	0	12.82483707	0	0	0	0	4.224076491	0	0	0	9.908557206	0	5	0	0	0	0	11	0	0	0	40	middle
3401	hsa-miR-1268b_R-2	CGGGCGTGGTGGTGGGGG	down	0.952873399	-0.069643548	0.953173622	13.06064066	12.44513706	18.31289337	6.412418537	0	40.57789141	0	13.4664014	2.112038246	7.844011178	2.906359931	44.87401657	3.467995022	5	2.5	0	6	0	11	5.5	33.5	8	302	14	middle
3402	hsa-miR-1268a	CGGGCGTGGTGGTGGGGG	down	0.952873399	-0.069643548	0.953173622	13.06064066	12.44513706	18.31289337	6.412418537	0	40.57789141	0	13.4664014	2.112038246	7.844011178	2.906359931	44.87401657	3.467995022	5	2.5	0	6	0	11	5.5	33.5	8	302	14	middle
3403	hsa-miR-326_R+1	CCTCTGGGCCCTTCCTCCAGT	up	1.04783544	0.067412163	0.954310584	6.634595653	6.951964454	0	20.51973932	12.65323895	0	0	0	0	0	15.25838964	9.361135907	17.09226118	0	8	6	0	0	0	0	0	42	63	69	middle
3404	hsa-miR-193b-3p	AACTGGCCCTCAAAGTCCCGCT	up	1.030777251	0.043732603	0.95850543	20.08165814	20.69971637	47.61352275	0	18.97985842	33.8149095	0	24.48436618	0	39.57128027	33.78643419	2.080252424	24.27596515	13	0	9	5	0	20	0	169	93	14	98	middle
3406	hsa-miR-122-5p_R+1	TGGAGTGTGACAATGGTGTTTGT	down	0.968641303	-0.045965574	0.972147432	453.4309358	439.2119323	347.944974	53.86431571	44.28633632	74.39280091	1746.666252	866.7465628	268.0368537	128.5481235	33.78643419	1313.382227	24.77139301	95	21	21	11	386	708	698	549	93	8839	100	high
3407	hsa-miR-133b_R-1	TTTGGTCCCCTTCAACCAGCT	down	0.977803119	-0.032384087	0.979553465	8.037480958	7.859073951	0	15.38980449	0	24.7976003	0	29.38123942	3.71206722	4.995191198	6.176014853	0.247649098	2.642281922	0	6	0	3.666666667	0	24	9.666666667	21.33333333	17	1.666666667	10.66666667	middle
3408	hsa-miR-1843_L+1	ATATGGAGGTCTCTGTCTGGC	up	1.020955948	0.029920619	0.984698172	6.335058945	6.467816112	0	0	0	0	31.67529473	0	5.760104306	8.195235559	12.7153247	6.686525648	5.449706463	0	0	0	0	7	0	15	35	35	45	22	middle
3413	hsa-mir-548p-p3	CAAAAACTGCAGTTACTTTTGC	down	0.999200782	-0.001153489	0.999498033	0.854989138	0.854305815	0	4.274945691	0	0	0	3.672654927	0	0	1.453179965	0	0	0	1.666666667	0	0	0	3	0	0	4	0	0	low
3414	hsa-miR-548av-3p_L+2_1	CAAAAACTGCAGTTACTTTTGC	down	0.999200782	-0.001153489	0.999498033	0.854989138	0.854305815	0	4.274945691	0	0	0	3.672654927	0	0	1.453179965	0	0	0	1.666666667	0	0	0	3	0	0	4	0	0	low
3415	hsa-miR-548av-3p_L+2_2	CCAAAACTGCAGTTACTTTTGC	down	0.999200782	-0.001153489	0.999498033	0.854989138	0.854305815	0	4.274945691	0	0	0	3.672654927	0	0	1.453179965	0	0	0	1.666666667	0	0	0	3	0	0	4	0	0	low
